# Supplementary material for: Pac-Man bacteria eat nanoprobes for aggregation-enhanced imaging and killing diverse microorganisms
Source: Research Square preprint supplement (doi:10.21203/rs.3.rs-272302/v1), 2021-04-09
Supplement: Supplementary file 1 [file 07328d3689351016e5798fb9.xlsx]

## Sheet: Figure S1b
S 1b
	Size	Mean		Size	Mean
AuNPs	nm	Number %	GP-AuNPs@Ce6	nm	Number %
	0.4	0		0.4	0
	0.4632	0		0.4632	0
	0.5365	0		0.5365	0
	0.6213	0		0.6213	0
	0.7195	0		0.7195	0
	0.8332	0		0.8332	0
	0.9649	0		0.9649	0
	1.117	0		1.117	0
	1.294	0		1.294	0
	1.499	0		1.499	0
	1.736	0		1.736	0
	2.01	0		2.01	0
	2.328	0		2.328	0
	2.696	0		2.696	0
	3.122	0		3.122	0
	3.615	0		3.615	0
	4.187	0		4.187	0
	4.849	0		4.849	0
	5.615	0		5.615	0
	6.503	0		6.503	0
	7.531	0		7.531	0
	8.721	8.5		8.721	0
	10.1	38.2		10.1	0
	11.7	33.4		11.7	7.8
	13.54	14.3		13.54	39.6
	15.69	4.3		15.69	34.4
	18.17	1.3		18.17	18.2
	21.04	0		21.04	0
	24.36	0		24.36	0
	28.21	0		28.21	0

## Sheet: Figure S1c
S 1c
		Zeta Potential(mV)
	AuNPs	16.5	16.7	16.2
	GP	-4.34	-4.37	-5.03
	GP-AuNPs	12.1	10.98	11.4
	Ce6	-2.8	-2.34	-1.99
	GP-AuNPs@Ce6	8.97	9.05	8.86

## Sheet: Figure S1d
S 1d
	Wavelength(nm)	Absorbance		Wavelength(nm)	Absorbance		Wavelength(nm)	Absorbance
AuNPs	200	0.6039	Ce6	200	1.4043	GP-AuNPs@Ce6	200	0.9052
	202	0.5915		202	0.9376		202	0.742
	204	0.5819		204	0.7047		204	0.668
	206	0.5722		206	0.5683		206	0.6203
	208	0.5652		208	0.5088		208	0.5907
	210	0.5557		210	0.4781		210	0.5694
	212	0.5471		212	0.4554		212	0.5478
	214	0.5363		214	0.4398		214	0.5282
	216	0.5281		216	0.4243		216	0.5121
	218	0.5169		218	0.4108		218	0.494
	220	0.5075		220	0.3995		220	0.4768
	222	0.5027		222	0.3876		222	0.4668
	224	0.4931		224	0.3752		224	0.4499
	226	0.4856		226	0.3615		226	0.4361
	228	0.478		228	0.3498		228	0.4237
	230	0.4758		230	0.3372		230	0.413
	232	0.4719		232	0.3257		232	0.4078
	234	0.4663		234	0.318		234	0.3961
	236	0.4667		236	0.3072		236	0.3913
	238	0.4614		238	0.2979		238	0.3813
	240	0.4604		240	0.2882		240	0.3776
	242	0.4589		242	0.2793		242	0.3711
	244	0.4554		244	0.2704		244	0.3649
	246	0.4551		246	0.2644		246	0.3614
	248	0.453		248	0.2562		248	0.3582
	250	0.4497		250	0.2502		250	0.3514
	252	0.4497		252	0.2458		252	0.3545
	254	0.4494		254	0.2385		254	0.3526
	256	0.4472		256	0.2372		256	0.3501
	258	0.4448		258	0.2367		258	0.3471
	260	0.442		260	0.2338		260	0.3458
	262	0.4393		262	0.2325		262	0.3431
	264	0.4362		264	0.2338		264	0.3432
	266	0.4344		266	0.2366		266	0.3421
	268	0.4314		268	0.2396		268	0.3417
	270	0.428		270	0.2454		270	0.3408
	272	0.4234		272	0.2526		272	0.3405
	274	0.4206		274	0.2574		274	0.3408
	276	0.417		276	0.2657		276	0.3403
	278	0.413		278	0.2759		278	0.3399
	280	0.4089		280	0.2809		280	0.3404
	282	0.4045		282	0.2868		282	0.3387
	284	0.3999		284	0.2871		284	0.3363
	286	0.3944		286	0.2838		286	0.3323
	288	0.3879		288	0.2759		288	0.3258
	290	0.3851		290	0.2699		290	0.3199
	292	0.3812		292	0.2616		292	0.3145
	294	0.3742		294	0.26		294	0.307
	296	0.3713		296	0.2554		296	0.302
	298	0.367		298	0.251		298	0.2995
	300	0.36		300	0.2486		300	0.2937
	302	0.3553		302	0.2484		302	0.291
	304	0.3509		304	0.2477		304	0.285
	306	0.3465		306	0.2436		306	0.2801
	308	0.3421		308	0.245		308	0.276
	310	0.3363		310	0.2446		310	0.2703
	312	0.3318		312	0.2439		312	0.2651
	314	0.3309		314	0.2465		314	0.2646
	316	0.326		316	0.2455		316	0.2608
	318	0.3224		318	0.2475		318	0.2581
	320	0.3186		320	0.2492		320	0.2564
	322	0.3175		322	0.253		322	0.2571
	324	0.3159		324	0.2566		324	0.2568
	326	0.3088		326	0.2609		326	0.2541
	328	0.3077		328	0.2642		328	0.2549
	330	0.3056		330	0.2703		330	0.2561
	332	0.3026		332	0.278		332	0.2578
	334	0.3021		334	0.2849		334	0.2588
	336	0.2969		336	0.2915		336	0.2609
	338	0.2972		338	0.2972		338	0.2619
	340	0.2948		340	0.3063		340	0.2642
	342	0.2918		342	0.3131		342	0.2662
	344	0.2905		344	0.3207		344	0.2708
	346	0.2892		346	0.3269		346	0.2739
	348	0.2891		348	0.3326		348	0.2791
	350	0.2867		350	0.342		350	0.2813
	352	0.2862		352	0.3475		352	0.2849
	354	0.2839		354	0.3559		354	0.2904
	356	0.2841		356	0.3616		356	0.2937
	358	0.2845		358	0.3703		358	0.2989
	360	0.2819		360	0.38		360	0.3024
	362	0.2807		362	0.3872		362	0.305
	364	0.2786		364	0.3962		364	0.311
	366	0.2776		366	0.4085		366	0.3163
	368	0.2757		368	0.4217		368	0.3215
	370	0.2759		370	0.4367		370	0.332
	372	0.273		372	0.4512		372	0.3407
	374	0.2721		374	0.4684		374	0.3543
	376	0.2692		376	0.4926		376	0.3708
	378	0.2691		378	0.5193		378	0.3906
	380	0.268		380	0.5496		380	0.4087
	382	0.2662		382	0.5859		382	0.4292
	384	0.2665		384	0.6207		384	0.4526
	386	0.2644		386	0.656		386	0.4737
	388	0.2617		388	0.6988		388	0.4978
	390	0.2606		390	0.7412		390	0.5272
	392	0.2593		392	0.7784		392	0.5585
	394	0.2563		394	0.8194		394	0.5965
	396	0.2563		396	0.856		396	0.6325
	398	0.2533		398	0.8928		398	0.671
	400	0.2521		400	0.9286		400	0.7005
	402	0.2497		402	0.9576		402	0.7163
	404	0.2504		404	0.9661		404	0.7163
	406	0.2474		406	0.969		406	0.6942
	408	0.2455		408	0.9577		408	0.6504
	410	0.2449		410	0.942		410	0.596
	412	0.2433		412	0.9284		412	0.536
	414	0.241		414	0.9059		414	0.4755
	416	0.2401		416	0.8755		416	0.4248
	418	0.24		418	0.8258		418	0.3812
	420	0.2391		420	0.7555		420	0.3398
	422	0.2399		422	0.6793		422	0.3051
	424	0.2388		424	0.5962		424	0.2715
	426	0.2383		426	0.5284		426	0.2468
	428	0.2378		428	0.4738		428	0.2242
	430	0.24		430	0.4332		430	0.2121
	432	0.2374		432	0.4054		432	0.2019
	434	0.2384		434	0.3844		434	0.1933
	436	0.237		436	0.3662		436	0.1857
	438	0.2376		438	0.3554		438	0.1815
	440	0.2356		440	0.3466		440	0.1765
	442	0.2346		442	0.34		442	0.1745
	444	0.2349		444	0.3331		444	0.1713
	446	0.2336		446	0.3267		446	0.1686
	448	0.2337		448	0.3224		448	0.1656
	450	0.2328		450	0.3186		450	0.165
	452	0.2332		452	0.3121		452	0.1617
	454	0.232		454	0.3093		454	0.1606
	456	0.2324		456	0.3067		456	0.1601
	458	0.2323		458	0.3024		458	0.16
	460	0.2321		460	0.2981		460	0.1591
	462	0.2335		462	0.2953		462	0.159
	464	0.2333		464	0.292		464	0.1576
	466	0.2339		466	0.288		466	0.1584
	468	0.2332		468	0.2858		468	0.1578
	470	0.2348		470	0.2839		470	0.1595
	472	0.2356		472	0.2786		472	0.1603
	474	0.2394		474	0.2779		474	0.1626
	476	0.2416		476	0.2744		476	0.1636
	478	0.2429		478	0.2702		478	0.1656
	480	0.2451		480	0.2675		480	0.1668
	482	0.2455		482	0.2661		482	0.1676
	484	0.2468		484	0.2648		484	0.1699
	486	0.2502		486	0.2612		486	0.1726
	488	0.2544		488	0.261		488	0.1762
	490	0.2579		490	0.2588		490	0.1825
	492	0.2606		492	0.2576		492	0.187
	494	0.2664		494	0.2544		494	0.1944
	496	0.2705		496	0.256		496	0.2012
	498	0.2742		498	0.2551		498	0.2063
	500	0.2818		500	0.2539		500	0.2133
	502	0.287		502	0.2554		502	0.2155
	504	0.2926		504	0.2541		504	0.2205
	506	0.2976		506	0.2528		506	0.2232
	508	0.3044		508	0.2552		508	0.2266
	510	0.3089		510	0.2567		510	0.2259
	512	0.3138		512	0.2556		512	0.2253
	514	0.3188		514	0.2553		514	0.2283
	516	0.3252		516	0.2569		516	0.2296
	518	0.33		518	0.2575		518	0.2293
	520	0.3324		520	0.2583		520	0.2309
	522	0.3418		522	0.258		522	0.2328
	524	0.3461		524	0.2601		524	0.2346
	526	0.3463		526	0.2571		526	0.235
	528	0.3518		528	0.2567		528	0.2374
	530	0.3544		530	0.2554		530	0.2388
	532	0.3567		532	0.2532		532	0.2414
	534	0.3592		534	0.2517		534	0.2418
	536	0.3621		536	0.2486		536	0.2421
	538	0.3642		538	0.248		538	0.2418
	540	0.3642		540	0.2441		540	0.2404
	542	0.3641		542	0.2441		542	0.24
	544	0.3641		544	0.242		544	0.2385
	546	0.3636		546	0.2419		546	0.2384
	548	0.3641		548	0.2373		548	0.2363
	550	0.3632		550	0.2362		550	0.2327
	552	0.3619		552	0.2321		552	0.2322
	554	0.3577		554	0.2314		554	0.2271
	556	0.3589		556	0.2333		556	0.2271
	558	0.353		558	0.2297		558	0.221
	560	0.3504		560	0.226		560	0.2205
	562	0.3501		562	0.2235		562	0.2153
	564	0.3458		564	0.224		564	0.2106
	566	0.3399		566	0.2201		566	0.207
	568	0.336		568	0.2161		568	0.2009
	570	0.3316		570	0.2164		570	0.2007
	572	0.3261		572	0.2135		572	0.1965
	574	0.32		574	0.212		574	0.1902
	576	0.3141		576	0.2088		576	0.1845
	578	0.3096		578	0.2084		578	0.1835
	580	0.3034		580	0.207		580	0.1798
	582	0.2971		582	0.2066		582	0.1754
	584	0.2922		584	0.2067		584	0.171
	586	0.2862		586	0.2046		586	0.1674
	588	0.2809		588	0.2038		588	0.1665
	590	0.2733		590	0.2028		590	0.162
	592	0.2671		592	0.2011		592	0.1576
	594	0.2578		594	0.1983		594	0.1539
	596	0.2522		596	0.193		596	0.1498
	598	0.2456		598	0.1935		598	0.1478
	600	0.2393		600	0.1898		600	0.1448
	602	0.229		602	0.188		602	0.1403
	604	0.2253		604	0.1853		604	0.1359
	606	0.2192		606	0.1866		606	0.1312
	608	0.2114		608	0.1817		608	0.1277
	610	0.2048		610	0.1809		610	0.123
	612	0.2012		612	0.1833		612	0.1208
	614	0.1948		614	0.1828		614	0.1172
	616	0.1853		616	0.1833		616	0.11
	618	0.1796		618	0.18		618	0.1119
	620	0.1766		620	0.1851		620	0.1119
	622	0.168		622	0.1878		622	0.1073
	624	0.1626		624	0.1931		624	0.1033
	626	0.1599		626	0.1995		626	0.1043
	628	0.1556		628	0.2071		628	0.1056
	630	0.1468		630	0.2197		630	0.1044
	632	0.1428		632	0.2338		632	0.1032
	634	0.1411		634	0.2472		634	0.1084
	636	0.1356		636	0.2577		636	0.1091
	638	0.1324		638	0.2683		638	0.1141
	640	0.1252		640	0.2713		640	0.12
	642	0.1215		642	0.2744		642	0.1251
	644	0.1187		644	0.2713		644	0.136
	646	0.1117		646	0.2648		646	0.144
	648	0.1103		648	0.2576		648	0.1562
	650	0.1084		650	0.25		650	0.1659
	652	0.1059		652	0.2489		652	0.1688
	654	0.1012		654	0.2375		654	0.1722
	656	0.1006		656	0.2393		656	0.1757
	658	0.096		658	0.2344		658	0.1643
	660	0.0914		660	0.2341		660	0.1494
	662	0.0897		662	0.2338		662	0.1319
	664	0.088		664	0.235		664	0.1198
	666	0.0841		666	0.2314		666	0.1029
	668	0.0808		668	0.2341		668	0.086
	670	0.0803		670	0.2325		670	0.0772
	672	0.0753		672	0.2345		672	0.0681
	674	0.0717		674	0.2337		674	0.0604
	676	0.0715		676	0.2336		676	0.0546
	678	0.068		678	0.2339		678	0.0493
	680	0.0679		680	0.2346		680	0.0507
	682	0.0661		682	0.2334		682	0.0468
	684	0.0641		684	0.2317		684	0.0431
	686	0.0642		686	0.2325		686	0.0437
	688	0.0611		688	0.2397		688	0.0422
	690	0.0615		690	0.2345		690	0.0377
	692	0.0572		692	0.2362		692	0.0359
	694	0.0584		694	0.2367		694	0.0429
	696	0.0568		696	0.2273		696	0.0345
	698	0.0558		698	0.233		698	0.0365
	700	0.0523		700	0.229		700	0.0351
	702	0.0529		702	0.2318		702	0.0385
	704	0.0494		704	0.2292		704	0.0331
	706	0.0514		706	0.2253		706	0.0363
	708	0.0543		708	0.2273		708	0.0311
	710	0.0521		710	0.2253		710	0.0322
	712	0.0456		712	0.2288		712	0.0267
	714	0.0382		714	0.2195		714	0.028
	716	0.0424		716	0.2155		716	0.0277
	718	0.0408		718	0.2187		718	0.0239
	720	0.0433		720	0.2177		720	0.0241
	722	0.0378		722	0.2113		722	0.0225
	724	0.0417		724	0.2152		724	0.0282
	726	0.0377		726	0.21		726	0.0157
	728	0.0401		728	0.2092		728	0.0239
	730	0.0322		730	0.2085		730	0.0177
	732	0.0404		732	0.2084		732	0.0205
	734	0.0387		734	0.2043		734	0.0214
	736	0.037		736	0.2003		736	0.0213
	738	0.0356		738	0.1998		738	0.0177
	740	0.0329		740	0.2002		740	0.0179
	742	0.0328		742	0.1977		742	0.0216
	744	0.0304		744	0.196		744	0.016
	746	0.0323		746	0.1908		746	0.0183
	748	0.0326		748	0.1937		748	0.0153
	750	0.0308		750	0.1962		750	0.0185
	752	0.0312		752	0.191		752	0.0171
	754	0.0258		754	0.1882		754	0.0121
	756	0.0283		756	0.1911		756	0.0143
	758	0.0322		758	0.1863		758	0.0175
	760	0.0277		760	0.186		760	0.0168
	762	0.0299		762	0.1802		762	0.0145
	764	0.0283		764	0.1837		764	0.0158
	766	0.0289		766	0.1796		766	0.0146
	768	0.0305		768	0.1791		768	0.0129
	770	0.0216		770	0.178		770	0.0147
	772	0.0257		772	0.1794		772	0.0176
	774	0.0255		774	0.1745		774	0.0133
	776	0.0241		776	0.1779		776	0.0087
	778	0.0262		778	0.1677		778	0.0162
	780	0.0237		780	0.1679		780	0.012
	782	0.0263		782	0.1737		782	0.014
	784	0.029		784	0.1731		784	0.0129
	786	0.0208		786	0.1661		786	0.0099
	788	0.0286		788	0.1612		788	0.0132
	790	0.0196		790	0.165		790	0.0131
	792	0.024		792	0.1638		792	0.0105
	794	0.025		794	0.1631		794	0.0176
	796	0.0183		796	0.1607		796	0.0079
	798	0.0216		798	0.1645		798	0.0083
	800	0.022		800	0.1622		800	0.0101

## Sheet: Figure S1e
S 1e
		Wavelength(nm)	Absorbance		Wavelength(nm)	Absorbance		Wavelength(nm)	Absorbance
	GP	200	2.0382	GP-AuNPs	200	3.5699	GP-AuNPs+Phenl-sulfuric	200	3.6559
		201	1.9407		201	4.0538		201	3.9631
		202	1.8963		202	3.2928		202	9.9999
		203	1.8486		203	3.5264		203	9.9999
		204	1.788		204	9.9999		204	3.66
		205	1.7028		205	3.5175		205	9.9999
		206	1.6425		206	9.9999		206	9.9999
		207	1.5743		207	4.1065		207	9.9999
		208	1.4986		208	3.5318		208	4.219
		209	1.4265		209	9.9999		209	9.9999
		210	1.3693		210	4.3958		210	9.9999
		211	1.3008		211	3.4529		211	9.9999
		212	1.2393		212	4.0122		212	9.9999
		213	1.177		213	3.5283		213	4.009
		214	1.1256		214	3.2561		214	4.914
		215	1.0733		215	3.3461		215	9.9999
		216	1.0244		216	3.1358		216	4.5933
		217	0.9796		217	2.9777		217	9.9999
		218	0.9361		218	3.0733		218	9.9999
		219	0.8997		219	2.9561		219	9.9999
		220	0.8666		220	2.8396		220	9.9999
		221	0.831		221	2.8194		221	9.9999
		222	0.8025		222	2.7121		222	9.9999
		223	0.7749		223	2.6795		223	3.914
		224	0.7478		224	2.6126		224	9.9999
		225	0.7228		225	2.5982		225	4.0267
		226	0.702		226	2.5419		226	4.4033
		227	0.681		227	2.5102		227	9.9999
		228	0.6603		228	2.4702		228	7.3384
		229	0.6455		229	2.4472		229	9.9999
		230	0.631		230	2.4316		230	4.1067
		231	0.6151		231	2.4232		231	4.5757
		232	0.6007		232	2.4017		232	4.2532
		233	0.5844		233	2.3845		233	4.8591
		234	0.5693		234	2.366		234	4.3517
		235	0.5567		235	2.3501		235	4.1003
		236	0.5446		236	2.3414		236	9.9999
		237	0.5338		237	2.3285		237	9.9999
		238	0.5237		238	2.3335		238	4.3068
		239	0.515		239	2.3278		239	9.9999
		240	0.5063		240	2.3128		240	9.9999
		241	0.4989		241	2.3158		241	4.2209
		242	0.4927		242	2.3132		242	4.1377
		243	0.4867		243	2.3111		243	4.4425
		244	0.4815		244	2.3169		244	3.9791
		245	0.4763		245	2.3147		245	4.793
		246	0.4698		246	2.313		246	3.8421
		247	0.4633		247	2.3148		247	4.0989
		248	0.4588		248	2.3221		248	3.9624
		249	0.454		249	2.327		249	3.8028
		250	0.4483		250	2.3313		250	4.3401
		251	0.4442		251	2.3413		251	3.9889
		252	0.439		252	2.3303		252	3.8369
		253	0.4337		253	2.3437		253	3.7395
		254	0.4301		254	2.3439		254	4.3836
		255	0.4262		255	2.3233		255	3.956
		256	0.4211		256	2.3174		256	3.9232
		257	0.4179		257	2.3147		257	4.4687
		258	0.4141		258	2.2959		258	4.2357
		259	0.4095		259	2.2816		259	3.935
		260	0.4058		260	2.2758		260	3.8148
		261	0.4016		261	2.2646		261	3.6089
		262	0.3984		262	2.2588		262	3.7749
		263	0.3955		263	2.2602		263	3.7191
		264	0.3917		264	2.2527		264	3.6124
		265	0.3879		265	2.2579		265	3.7413
		266	0.3852		266	2.2548		266	3.8841
		267	0.3816		267	2.256		267	3.7627
		268	0.3785		268	2.27		268	3.5922
		269	0.3756		269	2.2696		269	3.7398
		270	0.3729		270	2.2645		270	3.4476
		271	0.3698		271	2.278		271	3.6112
		272	0.3665		272	2.2759		272	3.8208
		273	0.3641		273	2.2762		273	3.7779
		274	0.3609		274	2.2872		274	3.4964
		275	0.3583		275	2.2858		275	3.717
		276	0.3554		276	2.2905		276	3.4604
		277	0.3516		277	2.2861		277	3.7881
		278	0.3489		278	2.2771		278	3.7253
		279	0.3471		279	2.2709		279	3.5158
		280	0.3432		280	2.2539		280	3.4086
		281	0.3404		281	2.231		281	3.5552
		282	0.3373		282	2.2105		282	3.5978
		283	0.3335		283	2.1846		283	3.4771
		284	0.3305		284	2.155		284	3.5469
		285	0.3274		285	2.1337		285	3.4806
		286	0.3239		286	2.1001		286	3.4662
		287	0.3201		287	2.0797		287	3.4088
		288	0.3164		288	2.0516		288	3.3592
		289	0.3129		289	2.0202		289	3.473
		290	0.31		290	1.9911		290	3.3445
		291	0.3064		291	1.9666		291	3.4703
		292	0.3029		292	1.9416		292	3.3928
		293	0.2998		293	1.9096		293	3.3672
		294	0.2956		294	1.8793		294	3.4002
		295	0.292		295	1.8551		295	3.3996
		296	0.2881		296	1.827		296	3.4255
		297	0.2849		297	1.8017		297	3.3413
		298	0.2814		298	1.7832		298	3.4099
		299	0.2788		299	1.7547		299	3.2788
		300	0.2754		300	1.7299		300	3.3779
		301	0.2733		301	1.7089		301	3.271
		302	0.2705		302	1.6892		302	3.296
		303	0.2681		303	1.6705		303	3.3417
		304	0.2661		304	1.6514		304	3.2165
		305	0.2639		305	1.6269		305	3.2531
		306	0.2615		306	1.6102		306	3.1935
		307	0.2604		307	1.5964		307	3.1944
		308	0.2587		308	1.5738		308	3.0825
		309	0.2562		309	1.5604		309	2.9778
		310	0.2549		310	1.546		310	2.9038
		311	0.2532		311	1.5337		311	2.85
		312	0.2515		312	1.5167		312	2.7592
		313	0.2496		313	1.5057		313	2.7471
		314	0.2489		314	1.4902		314	2.6198
		315	0.247		315	1.481		315	2.5674
		316	0.2454		316	1.4723		316	2.4951
		317	0.2444		317	1.4601		317	2.443
		318	0.243		318	1.4479		318	2.3643
		319	0.2423		319	1.4383		319	2.3128
		320	0.2411		320	1.4291		320	2.2699
		321	0.2388		321	1.4182		321	2.2163
		322	0.2377		322	1.41		322	2.1644
		323	0.2381		323	1.4016		323	2.1277
		324	0.2356		324	1.3917		324	2.0857
		325	0.2346		325	1.3863		325	2.0516
		326	0.2338		326	1.3788		326	2.025
		327	0.2325		327	1.3732		327	1.9856
		328	0.2314		328	1.3687		328	1.9607
		329	0.2301		329	1.3569		329	1.9344
		330	0.2289		330	1.3502		330	1.9098
		331	0.2284		331	1.3467		331	1.8713
		332	0.2265		332	1.3416		332	1.8373
		333	0.2244		333	1.3335		333	1.8343
		334	0.2243		334	1.3262		334	1.8011
		335	0.2216		335	1.3223		335	1.7765
		336	0.2197		336	1.3182		336	1.7566
		337	0.2188		337	1.3143		337	1.7335
		338	0.2176		338	1.3093		338	1.7173
		339	0.2154		339	1.306		339	1.6948
		340	0.2177		340	1.2978		340	1.684
		341	0.2129		341	1.2966		341	1.668
		342	0.2143		342	1.2915		342	1.6413
		343	0.212		343	1.2914		343	1.6255
		344	0.2098		344	1.2835		344	1.6053
		345	0.2104		345	1.2833		345	1.5944
		346	0.209		346	1.28		346	1.5726
		347	0.206		347	1.2781		347	1.5535
		348	0.2048		348	1.2705		348	1.5385
		349	0.2049		349	1.2647		349	1.5223
		350	0.2024		350	1.2626		350	1.5043
		351	0.2015		351	1.2601		351	1.487
		352	0.1997		352	1.2555		352	1.4665
		353	0.1985		353	1.2497		353	1.4532
		354	0.1982		354	1.2431		354	1.4405
		355	0.1969		355	1.2383		355	1.4242
		356	0.1943		356	1.2284		356	1.4075
		357	0.1938		357	1.226		357	1.3945
		358	0.1928		358	1.2193		358	1.3793
		359	0.1914		359	1.213		359	1.3668
		360	0.1902		360	1.2047		360	1.3516
		361	0.19		361	1.1963		361	1.3412
		362	0.1876		362	1.1921		362	1.3264
		363	0.1869		363	1.1856		363	1.3167
		364	0.1871		364	1.179		364	1.3018
		365	0.184		365	1.1727		365	1.2873
		366	0.1844		366	1.1636		366	1.2735
		367	0.1821		367	1.1556		367	1.2583
		368	0.1807		368	1.149		368	1.2435
		369	0.1794		369	1.139		369	1.2321
		370	0.179		370	1.1324		370	1.2163
		371	0.177		371	1.1268		371	1.2049
		372	0.1761		372	1.1178		372	1.1882
		373	0.1757		373	1.1094		373	1.1754
		374	0.1749		374	1.1006		374	1.1608
		375	0.1736		375	1.0903		375	1.1473
		376	0.1729		376	1.0819		376	1.1329
		377	0.1717		377	1.0733		377	1.1202
		378	0.1704		378	1.0649		378	1.107
		379	0.1684		379	1.0547		379	1.0921
		380	0.171		380	1.0486		380	1.08
		381	0.1698		381	1.0355		381	1.0671
		382	0.1666		382	1.0271		382	1.051
		383	0.1674		383	1.0177		383	1.0387
		384	0.166		384	1.007		384	1.0268
		385	0.1644		385	0.9959		385	1.0138
		386	0.1633		386	0.989		386	1.002
		387	0.1633		387	0.9791		387	0.9887
		388	0.1623		388	0.9681		388	0.9763
		389	0.1621		389	0.9611		389	0.9657
		390	0.1617		390	0.9507		390	0.9543
		391	0.1607		391	0.9403		391	0.942
		392	0.1601		392	0.9327		392	0.9339
		393	0.1594		393	0.9244		393	0.9236
		394	0.1587		394	0.9154		394	0.9154
		395	0.157		395	0.9084		395	0.9069
		396	0.1576		396	0.9005		396	0.899
		397	0.156		397	0.8927		397	0.893
		398	0.1562		398	0.8849		398	0.8847
		399	0.1547		399	0.8768		399	0.8795
		400	0.1536		400	0.8707		400	0.8724
		401	0.1539		401	0.8622		401	0.8634
		402	0.1537		402	0.8544		402	0.8593
		403	0.1516		403	0.8475		403	0.8538
		404	0.1518		404	0.8414		404	0.848
		405	0.1511		405	0.8353		405	0.8451
		406	0.1498		406	0.8282		406	0.8403
		407	0.1494		407	0.8217		407	0.8366
		408	0.148		408	0.8151		408	0.8336
		409	0.1487		409	0.8089		409	0.8311
		410	0.1486		410	0.8026		410	0.8281
		411	0.1463		411	0.7955		411	0.8244
		412	0.1471		412	0.7903		412	0.8224
		413	0.147		413	0.7837		413	0.8199
		414	0.1453		414	0.7773		414	0.8176
		415	0.1447		415	0.771		415	0.8173
		416	0.1438		416	0.7657		416	0.8147
		417	0.1441		417	0.7596		417	0.8129
		418	0.1423		418	0.7532		418	0.8121
		419	0.1427		419	0.7478		419	0.8104
		420	0.1409		420	0.7421		420	0.8093
		421	0.14		421	0.737		421	0.808
		422	0.1395		422	0.7321		422	0.8066
		423	0.1388		423	0.7261		423	0.807
		424	0.1387		424	0.7217		424	0.8057
		425	0.1386		425	0.7162		425	0.805
		426	0.1371		426	0.7116		426	0.8045
		427	0.1367		427	0.7067		427	0.8047
		428	0.1363		428	0.7018		428	0.8038
		429	0.1349		429	0.6964		429	0.8019
		430	0.1365		430	0.6932		430	0.8028
		431	0.1359		431	0.6882		431	0.8015
		432	0.1349		432	0.6831		432	0.8018
		433	0.1341		433	0.6782		433	0.8023
		434	0.1336		434	0.6748		434	0.8014
		435	0.132		435	0.6695		435	0.8011
		436	0.1324		436	0.6643		436	0.8002
		437	0.1311		437	0.6616		437	0.8005
		438	0.1313		438	0.6578		438	0.7993
		439	0.131		439	0.6535		439	0.7981
		440	0.1296		440	0.6481		440	0.7976
		441	0.1287		441	0.6452		441	0.7979
		442	0.1294		442	0.642		442	0.7977
		443	0.1285		443	0.6382		443	0.798
		444	0.1284		444	0.6342		444	0.7972
		445	0.1282		445	0.6308		445	0.7967
		446	0.1274		446	0.6277		446	0.7968
		447	0.1263		447	0.6243		447	0.796
		448	0.1259		448	0.6218		448	0.7962
		449	0.124		449	0.6181		449	0.7941
		450	0.1242		450	0.6149		450	0.7953
		451	0.1239		451	0.6127		451	0.7963
		452	0.1239		452	0.6087		452	0.7964
		453	0.1235		453	0.6066		453	0.7959
		454	0.1228		454	0.605		454	0.797
		455	0.1219		455	0.6021		455	0.7966
		456	0.1223		456	0.5996		456	0.7972
		457	0.1217		457	0.5984		457	0.7985
		458	0.1219		458	0.5949		458	0.7987
		459	0.1212		459	0.5926		459	0.8005
		460	0.12		460	0.5903		460	0.8003
		461	0.1192		461	0.589		461	0.8014
		462	0.119		462	0.5866		462	0.8028
		463	0.1181		463	0.5853		463	0.8023
		464	0.1169		464	0.5834		464	0.8035
		465	0.1179		465	0.5812		465	0.8057
		466	0.1174		466	0.5807		466	0.8059
		467	0.1167		467	0.5787		467	0.8064
		468	0.117		468	0.5774		468	0.8067
		469	0.1149		469	0.5756		469	0.8099
		470	0.1154		470	0.5746		470	0.8109
		471	0.1143		471	0.5744		471	0.8112
		472	0.1142		472	0.5719		472	0.8154
		473	0.1134		473	0.573		473	0.8179
		474	0.1133		474	0.5726		474	0.8205
		475	0.1114		475	0.5694		475	0.8226
		476	0.1139		476	0.5704		476	0.8304
		477	0.1125		477	0.5703		477	0.8352
		478	0.1124		478	0.5695		478	0.839
		479	0.1118		479	0.5703		479	0.8462
		480	0.1096		480	0.5691		480	0.853
		481	0.1114		481	0.5681		481	0.8608
		482	0.1105		482	0.568		482	0.8688
		483	0.1096		483	0.5682		483	0.8789
		484	0.1078		484	0.5673		484	0.8849
		485	0.1094		485	0.5686		485	0.8944
		486	0.1085		486	0.569		486	0.904
		487	0.1077		487	0.5697		487	0.9117
		488	0.1081		488	0.5707		488	0.9178
		489	0.1064		489	0.5699		489	0.9241
		490	0.1076		490	0.5717		490	0.9308
		491	0.1058		491	0.5724		491	0.9342
		492	0.1053		492	0.5724		492	0.9373
		493	0.1063		493	0.5747		493	0.9412
		494	0.1056		494	0.576		494	0.9396
		495	0.1062		495	0.5767		495	0.9394
		496	0.1048		496	0.5793		496	0.9367
		497	0.1033		497	0.5794		497	0.9315
		498	0.1028		498	0.5803		498	0.9259
		499	0.1051		499	0.5829		499	0.9174
		500	0.1024		500	0.5836		500	0.9069
		501	0.1004		501	0.5872		501	0.8946
		502	0.1021		502	0.5882		502	0.8852
		503	0.1018		503	0.5897		503	0.8696
		504	0.1005		504	0.5918		504	0.8574
		505	0.0983		505	0.5952		505	0.8429
		506	0.0978		506	0.5955		506	0.8294
		507	0.0992		507	0.5979		507	0.8141
		508	0.0977		508	0.6006		508	0.7995
		509	0.0986		509	0.6012		509	0.7848
		510	0.0965		510	0.6031		510	0.7688
		511	0.0976		511	0.6061		511	0.754
		512	0.0972		512	0.6068		512	0.7367
		513	0.0961		513	0.6098		513	0.7234
		514	0.0967		514	0.612		514	0.71
		515	0.0949		515	0.6161		515	0.6949
		516	0.096		516	0.617		516	0.6807
		517	0.095		517	0.6198		517	0.6657
		518	0.0938		518	0.621		518	0.6523
		519	0.094		519	0.6226		519	0.6406
		520	0.0913		520	0.6228		520	0.6275
		521	0.0936		521	0.6273		521	0.6157
		522	0.0924		522	0.6291		522	0.6048
		523	0.0903		523	0.6302		523	0.5921
		524	0.0908		524	0.6308		524	0.5809
		525	0.0917		525	0.6326		525	0.5718
		526	0.0903		526	0.6339		526	0.5607
		527	0.09		527	0.6359		527	0.5524
		528	0.0898		528	0.6378		528	0.5433
		529	0.0876		529	0.6375		529	0.5344
		530	0.088		530	0.6388		530	0.5265
		531	0.0884		531	0.6412		531	0.5205
		532	0.0882		532	0.6418		532	0.5113
		533	0.0881		533	0.6437		533	0.5046
		534	0.0859		534	0.6428		534	0.4969
		535	0.0871		535	0.6442		535	0.4931
		536	0.085		536	0.6454		536	0.4849
		537	0.0841		537	0.6447		537	0.479
		538	0.0836		538	0.646		538	0.474
		539	0.0859		539	0.6468		539	0.4673
		540	0.0832		540	0.6458		540	0.461
		541	0.082		541	0.6462		541	0.4557
		542	0.0827		542	0.6467		542	0.4531
		543	0.0815		543	0.6454		543	0.4467
		544	0.0815		544	0.6464		544	0.442
		545	0.0818		545	0.6462		545	0.4388
		546	0.0816		546	0.6454		546	0.4328
		547	0.0789		547	0.6445		547	0.4296
		548	0.0789		548	0.6444		548	0.4236
		549	0.0781		549	0.643		549	0.4194
		550	0.0787		550	0.6435		550	0.417
		551	0.078		551	0.6418		551	0.4134
		552	0.0775		552	0.6404		552	0.4093
		553	0.077		553	0.6389		553	0.4052
		554	0.0783		554	0.6386		554	0.4007
		555	0.0759		555	0.6358		555	0.3984
		556	0.0774		556	0.6344		556	0.396
		557	0.0743		557	0.6317		557	0.3899
		558	0.0744		558	0.6309		558	0.387
		559	0.0748		559	0.6297		559	0.3867
		560	0.0742		560	0.6265		560	0.3834
		561	0.0755		561	0.6252		561	0.3833
		562	0.0745		562	0.6206		562	0.3779
		563	0.0718		563	0.6181		563	0.3745
		564	0.0754		564	0.6183		564	0.3721
		565	0.0726		565	0.6134		565	0.37
		566	0.071		566	0.6105		566	0.3684
		567	0.073		567	0.608		567	0.3673
		568	0.0704		568	0.6022		568	0.3644
		569	0.0724		569	0.6013		569	0.3625
		570	0.0716		570	0.5991		570	0.3613
		571	0.0689		571	0.5944		571	0.3573
		572	0.0698		572	0.5935		572	0.3577
		573	0.0698		573	0.5874		573	0.3555
		574	0.0692		574	0.585		574	0.3552
		575	0.0664		575	0.5807		575	0.3539
		576	0.068		576	0.5765		576	0.3518
		577	0.0669		577	0.5727		577	0.3518
		578	0.0677		578	0.5709		578	0.3524
		579	0.0662		579	0.565		579	0.3495
		580	0.0664		580	0.5626		580	0.3457
		581	0.0673		581	0.5584		581	0.3472
		582	0.0652		582	0.5511		582	0.3405
		583	0.0655		583	0.5454		583	0.3437
		584	0.0667		584	0.5456		584	0.3417
		585	0.0665		585	0.5385		585	0.3368
		586	0.0641		586	0.5379		586	0.3385
		587	0.0633		587	0.535		587	0.3399
		588	0.0649		588	0.5277		588	0.3309
		589	0.0636		589	0.5237		589	0.332
		590	0.0629		590	0.5188		590	0.3286
		591	0.0624		591	0.5145		591	0.3272
		592	0.0655		592	0.5117		592	0.3266
		593	0.0637		593	0.5075		593	0.3229
		594	0.063		594	0.501		594	0.3205
		595	0.0649		595	0.4991		595	0.3185
		596	0.0622		596	0.4917		596	0.3125
		597	0.0632		597	0.4882		597	0.312
		598	0.0619		598	0.4844		598	0.3097
		599	0.0586		599	0.4777		599	0.3054
		600	0.0631		600	0.4762		600	0.301
		601	0.0632		601	0.471		601	0.3023
		602	0.0617		602	0.4655		602	0.2948
		603	0.0628		603	0.4621		603	0.2942
		604	0.0606		604	0.4545		604	0.291
		605	0.06		605	0.4518		605	0.2874
		606	0.0606		606	0.4463		606	0.2861
		607	0.0595		607	0.4422		607	0.2812
		608	0.062		608	0.4382		608	0.2786
		609	0.0615		609	0.4356		609	0.278
		610	0.0596		610	0.4305		610	0.274
		611	0.0591		611	0.424		611	0.2718
		612	0.0607		612	0.4199		612	0.2701
		613	0.0585		613	0.4142		613	0.2636
		614	0.0579		614	0.4111		614	0.2641
		615	0.0594		615	0.4061		615	0.2618
		616	0.057		616	0.4012		616	0.2565
		617	0.0593		617	0.4027		617	0.2588
		618	0.0576		618	0.3968		618	0.2551
		619	0.0574		619	0.3932		619	0.2528
		620	0.0599		620	0.3871		620	0.2499
		621	0.0541		621	0.3806		621	0.2485
		622	0.0578		622	0.3796		622	0.2474
		623	0.0597		623	0.3757		623	0.2496
		624	0.0586		624	0.3713		624	0.2406
		625	0.0606		625	0.3683		625	0.2425
		626	0.0596		626	0.3646		626	0.2437
		627	0.0578		627	0.36		627	0.2391
		628	0.057		628	0.3552		628	0.2406
		629	0.0583		629	0.3521		629	0.236
		630	0.057		630	0.3481		630	0.2335
		631	0.0588		631	0.346		631	0.2381
		632	0.0539		632	0.3395		632	0.23
		633	0.0545		633	0.3355		633	0.2288
		634	0.059		634	0.3372		634	0.2314
		635	0.0548		635	0.332		635	0.226
		636	0.0559		636	0.3286		636	0.2242
		637	0.0583		637	0.3277		637	0.2272
		638	0.053		638	0.3217		638	0.223
		639	0.0571		639	0.3181		639	0.2219
		640	0.057		640	0.3126		640	0.2204
		641	0.0561		641	0.3101		641	0.2171
		642	0.0569		642	0.3132		642	0.2198
		643	0.0568		643	0.3044		643	0.2139
		644	0.0554		644	0.3017		644	0.2141
		645	0.0574		645	0.3012		645	0.2169
		646	0.0545		646	0.2964		646	0.2105
		647	0.0557		647	0.2921		647	0.212
		648	0.0555		648	0.2879		648	0.2081
		649	0.0544		649	0.2893		649	0.2102
		650	0.0556		650	0.2839		650	0.2053
		651	0.055		651	0.2823		651	0.2038
		652	0.0556		652	0.2778		652	0.2026
		653	0.0564		653	0.2767		653	0.2026
		654	0.0564		654	0.274		654	0.1995
		655	0.0545		655	0.2694		655	0.1992
		656	0.0548		656	0.2723		656	0.1963
		657	0.057		657	0.2687		657	0.1992
		658	0.0541		658	0.265		658	0.1938
		659	0.0561		659	0.2632		659	0.1942
		660	0.0534		660	0.2619		660	0.1897
		661	0.0551		661	0.2631		661	0.1897
		662	0.0541		662	0.256		662	0.188
		663	0.0561		663	0.2537		663	0.1888
		664	0.0536		664	0.2528		664	0.1884
		665	0.0533		665	0.2461		665	0.1854
		666	0.0532		666	0.2487		666	0.1838
		667	0.0547		667	0.2458		667	0.1801
		668	0.0547		668	0.241		668	0.1774
		669	0.0535		669	0.24		669	0.1789
		670	0.0536		670	0.2413		670	0.1779
		671	0.054		671	0.2369		671	0.1767
		672	0.0545		672	0.2354		672	0.1745
		673	0.0546		673	0.2328		673	0.1715
		674	0.0523		674	0.2303		674	0.1717
		675	0.0537		675	0.2297		675	0.1721
		676	0.0519		676	0.2292		676	0.1692
		677	0.0528		677	0.2253		677	0.1687
		678	0.0552		678	0.2261		678	0.1656
		679	0.0507		679	0.2206		679	0.1614
		680	0.0552		680	0.2221		680	0.1669
		681	0.0549		681	0.2199		681	0.1614
		682	0.0512		682	0.2157		682	0.1583
		683	0.0551		683	0.2163		683	0.1587
		684	0.0519		684	0.2129		684	0.1545
		685	0.0532		685	0.213		685	0.1562
		686	0.0576		686	0.2139		686	0.1542
		687	0.0489		687	0.21		687	0.1523
		688	0.0547		688	0.2102		688	0.1525
		689	0.0565		689	0.2079		689	0.1517
		690	0.0509		690	0.2068		690	0.1461
		691	0.0533		691	0.2059		691	0.1446
		692	0.0531		692	0.2028		692	0.1453
		693	0.0492		693	0.2038		693	0.1432
		694	0.0528		694	0.2046		694	0.146
		695	0.0528		695	0.2013		695	0.1411
		696	0.0535		696	0.1989		696	0.1449
		697	0.0548		697	0.2014		697	0.1411
		698	0.0525		698	0.195		698	0.1366
		699	0.0543		699	0.1961		699	0.1368
		700	0.0524		700	0.196		700	0.1355
		701	0.0517		701	0.1941		701	0.1391
		702	0.0538		702	0.1934		702	0.1341
		703	0.0522		703	0.1872		703	0.1293
		704	0.0555		704	0.1907		704	0.1303
		705	0.0533		705	0.1895		705	0.1299
		706	0.0489		706	0.1876		706	0.1281
		707	0.0515		707	0.1876		707	0.1328
		708	0.054		708	0.1872		708	0.1287
		709	0.0538		709	0.1822		709	0.1259
		710	0.0582		710	0.1871		710	0.1257
		711	0.0551		711	0.1874		711	0.1242
		712	0.0521		712	0.1831		712	0.123
		713	0.0504		713	0.1807		713	0.1205
		714	0.0516		714	0.1786		714	0.1203
		715	0.0535		715	0.1807		715	0.121
		716	0.0483		716	0.1774		716	0.1185
		717	0.054		717	0.1809		717	0.12
		718	0.0537		718	0.1805		718	0.1214
		719	0.0524		719	0.1764		719	0.1179
		720	0.0617		720	0.1762		720	0.1191
		721	0.0515		721	0.1771		721	0.1168
		722	0.0551		722	0.1741		722	0.1099
		723	0.052		723	0.1746		723	0.1137
		724	0.0559		724	0.174		724	0.116
		725	0.05		725	0.1687		725	0.1087
		726	0.0552		726	0.1705		726	0.1158
		727	0.0515		727	0.1656		727	0.1093
		728	0.0507		728	0.1703		728	0.1073
		729	0.0567		729	0.1726		729	0.1088
		730	0.0493		730	0.1664		730	0.1086
		731	0.0575		731	0.167		731	0.1027
		732	0.0507		732	0.1633		732	0.1028
		733	0.0528		733	0.1638		733	0.1016
		734	0.0519		734	0.1666		734	0.1055
		735	0.0514		735	0.1676		735	0.1038
		736	0.0547		736	0.1659		736	0.1039
		737	0.0554		737	0.1667		737	0.1023
		738	0.0509		738	0.1605		738	0.1002
		739	0.0508		739	0.1591		739	0.0938
		740	0.0524		740	0.1603		740	0.1009
		741	0.0541		741	0.1622		741	0.1012
		742	0.0528		742	0.1589		742	0.0993
		743	0.0493		743	0.1575		743	0.0959
		744	0.0553		744	0.1524		744	0.094
		745	0.0514		745	0.1543		745	0.0943
		746	0.0467		746	0.1594		746	0.0993
		747	0.0563		747	0.1537		747	0.0994
		748	0.0502		748	0.1527		748	0.0966
		749	0.048		749	0.1508		749	0.0899
		750	0.0515		750	0.1561		750	0.0914
		751	0.048		751	0.1495		751	0.091
		752	0.0505		752	0.151		752	0.0908
		753	0.0514		753	0.152		753	0.0907
		754	0.0489		754	0.1518		754	0.0895
		755	0.0517		755	0.1511		755	0.0883
		756	0.0467		756	0.1473		756	0.0882
		757	0.0507		757	0.1462		757	0.0838
		758	0.0516		758	0.1451		758	0.0845
		759	0.045		759	0.1426		759	0.0854
		760	0.0441		760	0.1473		760	0.0867
		761	0.0471		761	0.141		761	0.0854
		762	0.0514		762	0.1395		762	0.0849
		763	0.0464		763	0.1397		763	0.0842
		764	0.0471		764	0.141		764	0.083
		765	0.0481		765	0.1379		765	0.0855
		766	0.0497		766	0.138		766	0.0827
		767	0.0456		767	0.1357		767	0.0784
		768	0.0454		768	0.1411		768	0.0853
		769	0.0508		769	0.1409		769	0.0789
		770	0.0491		770	0.139		770	0.0767
		771	0.0488		771	0.1404		771	0.082
		772	0.0496		772	0.1376		772	0.0785
		773	0.047		773	0.14		773	0.0848
		774	0.046		774	0.1366		774	0.0775
		775	0.0475		775	0.1352		775	0.0808
		776	0.044		776	0.1361		776	0.0747
		777	0.0471		777	0.1378		777	0.0764
		778	0.046		778	0.1375		778	0.0783
		779	0.0488		779	0.1404		779	0.0791
		780	0.0524		780	0.1414		780	0.081
		781	0.0472		781	0.1345		781	0.0783
		782	0.0447		782	0.1402		782	0.0787
		783	0.0436		783	0.1353		783	0.0767
		784	0.0434		784	0.1367		784	0.0768
		785	0.0492		785	0.1358		785	0.0766
		786	0.0424		786	0.1355		786	0.0772
		787	0.0471		787	0.1343		787	0.0789
		788	0.0473		788	0.133		788	0.0758
		789	0.0487		789	0.1348		789	0.0818
		790	0.0461		790	0.133		790	0.0726
		791	0.0485		791	0.1351		791	0.0765
		792	0.042		792	0.1365		792	0.0724
		793	0.0435		793	0.1342		793	0.0742
		794	0.0462		794	0.1341		794	0.0766
		795	0.0484		795	0.1346		795	0.0746
		796	0.0423		796	0.134		796	0.07
		797	0.045		797	0.1306		797	0.074
		798	0.0489		798	0.1353		798	0.0755
		799	0.0435		799	0.1312		799	0.0694
		800	0.0457		800	0.1316		800	0.0749
		801	0.0445		801	0.1289		801	0.0699
		802	0.0436		802	0.1366		802	0.076
		803	0.0465		803	0.1333		803	0.076
		804	0.0419		804	0.1309		804	0.0683
		805	0.0476		805	0.1353		805	0.0737
		806	0.0442		806	0.1323		806	0.072
		807	0.0458		807	0.1306		807	0.0704
		808	0.052		808	0.1339		808	0.0752
		809	0.0436		809	0.1244		809	0.068
		810	0.0417		810	0.1256		810	0.0716
		811	0.045		811	0.1315		811	0.0721
		812	0.0417		812	0.1252		812	0.0651
		813	0.0478		813	0.1278		813	0.0678
		814	0.0407		814	0.1261		814	0.0626
		815	0.0451		815	0.1294		815	0.0617
		816	0.0461		816	0.1263		816	0.068
		817	0.0442		817	0.1206		817	0.0654
		818	0.0422		818	0.1215		818	0.0686
		819	0.0471		819	0.1214		819	0.0689
		820	0.0418		820	0.1239		820	0.0647
		821	0.0438		821	0.1195		821	0.065
		822	0.0425		822	0.1188		822	0.0649
		823	0.0419		823	0.1201		823	0.0626
		824	0.0408		824	0.1132		824	0.0632
		825	0.0398		825	0.1084		825	0.0644
		826	0.0406		826	0.1121		826	0.0618
		827	0.0404		827	0.112		827	0.061
		828	0.0426		828	0.1152		828	0.0632
		829	0.0392		829	0.1093		829	0.0611
		830	0.0401		830	0.1052		830	0.0603
		831	0.0424		831	0.1079		831	0.063
		832	0.0443		832	0.1066		832	0.0583
		833	0.0374		833	0.1069		833	0.057
		834	0.0421		834	0.1099		834	0.06
		835	0.0386		835	0.106		835	0.0573
		836	0.0394		836	0.1017		836	0.0578
		837	0.0384		837	0.1018		837	0.0581
		838	0.0414		838	0.104		838	0.0577
		839	0.0438		839	0.1079		839	0.0585
		840	0.041		840	0.1002		840	0.0577
		841	0.042		841	0.0976		841	0.0546
		842	0.0402		842	0.0952		842	0.0518
		843	0.0379		843	0.0946		843	0.0555
		844	0.0369		844	0.0942		844	0.0563
		845	0.0346		845	0.0884		845	0.0511
		846	0.0376		846	0.095		846	0.056
		847	0.0402		847	0.0952		847	0.052
		848	0.0421		848	0.0988		848	0.0535
		849	0.0411		849	0.0923		849	0.0521
		850	0.0366		850	0.0918		850	0.0484
		851	0.0392		851	0.0959		851	0.0504
		852	0.0369		852	0.0914		852	0.0537
		853	0.0382		853	0.0899		853	0.0514
		854	0.0397		854	0.0891		854	0.0554
		855	0.0389		855	0.09		855	0.0514
		856	0.0415		856	0.0856		856	0.0468
		857	0.0427		857	0.0907		857	0.0481
		858	0.0355		858	0.0827		858	0.0479
		859	0.04		859	0.0792		859	0.0476
		860	0.0384		860	0.0795		860	0.0412
		861	0.0347		861	0.0815		861	0.0454
		862	0.0377		862	0.0853		862	0.05
		863	0.0346		863	0.0831		863	0.0487
		864	0.0345		864	0.0782		864	0.0459
		865	0.0337		865	0.0752		865	0.0452
		866	0.0338		866	0.0765		866	0.0458
		867	0.0374		867	0.0779		867	0.0469
		868	0.0367		868	0.0779		868	0.0468
		869	0.0414		869	0.0803		869	0.0475
		870	0.0382		870	0.0757		870	0.0468
		871	0.0339		871	0.0729		871	0.0394
		872	0.042		872	0.0787		872	0.0421
		873	0.038		873	0.074		873	0.0403
		874	0.0373		874	0.0693		874	0.0412
		875	0.036		875	0.0697		875	0.0412
		876	0.0354		876	0.0711		876	0.0397
		877	0.037		877	0.0684		877	0.039
		878	0.0334		878	0.069		878	0.0396
		879	0.0336		879	0.067		879	0.0385
		880	0.0352		880	0.0666		880	0.0372
		881	0.0334		881	0.0708		881	0.0369
		882	0.0318		882	0.0658		882	0.0366
		883	0.0298		883	0.0576		883	0.0362
		884	0.0319		884	0.0585		884	0.0369
		885	0.034		885	0.0609		885	0.0364
		886	0.0339		886	0.0626		886	0.0373
		887	0.0293		887	0.0622		887	0.0353
		888	0.0327		888	0.0592		888	0.0356
		889	0.0311		889	0.0619		889	0.0367
		890	0.0307		890	0.0628		890	0.0338
		891	0.0338		891	0.0618		891	0.0369
		892	0.0323		892	0.0622		892	0.0351
		893	0.0344		893	0.0606		893	0.0361
		894	0.033		894	0.0614		894	0.0325
		895	0.0302		895	0.0624		895	0.0314
		896	0.0286		896	0.0555		896	0.0319
		897	0.0306		897	0.0544		897	0.0334
		898	0.031		898	0.0559		898	0.0315
		899	0.0314		899	0.0589		899	0.033
		900	0.0326		900	0.0586		900	0.0328
		901	0.0318		901	0.0555		901	0.0296
		902	0.0309		902	0.0599		902	0.0325
		903	0.0316		903	0.0553		903	0.0302
		904	0.0312		904	0.0621		904	0.0292
		905	0.0289		905	0.0548		905	0.031
		906	0.0284		906	0.0488		906	0.0294
		907	0.0308		907	0.0535		907	0.0309
		908	0.0318		908	0.0574		908	0.0313
		909	0.0311		909	0.0559		909	0.0316
		910	0.0294		910	0.0536		910	0.032
		911	0.0322		911	0.0547		911	0.0309
		912	0.028		912	0.0553		912	0.0299
		913	0.0344		913	0.054		913	0.0299
		914	0.0324		914	0.0562		914	0.0282
		915	0.0334		915	0.0582		915	0.0275
		916	0.0308		916	0.0574		916	0.0264
		917	0.0283		917	0.0481		917	0.0266
		918	0.0264		918	0.0447		918	0.0259
		919	0.0292		919	0.0499		919	0.0254
		920	0.031		920	0.0524		920	0.0286
		921	0.0306		921	0.053		921	0.0252
		922	0.0302		922	0.0516		922	0.0276
		923	0.0283		923	0.0507		923	0.0255
		924	0.0296		924	0.0522		924	0.0252
		925	0.0294		925	0.0529		925	0.0242
		926	0.0262		926	0.0491		926	0.0227
		927	0.0269		927	0.0485		927	0.0269
		928	0.0316		928	0.0537		928	0.0228
		929	0.0315		929	0.0527		929	0.0223
		930	0.0308		930	0.0539		930	0.0221
		931	0.0269		931	0.0496		931	0.022
		932	0.028		932	0.0474		932	0.0164
		933	0.0305		933	0.0485		933	0.0157
		934	0.0316		934	0.0517		934	0.0224
		935	0.0309		935	0.0494		935	0.017
		936	0.03		936	0.0508		936	0.016
		937	0.0303		937	0.0509		937	0.0137
		938	0.0286		938	0.0478		938	0.0132
		939	0.0278		939	0.0451		939	0.0101
		940	0.0269		940	0.0449		940	0.0125
		941	0.0298		941	0.0481		941	0.0101
		942	0.0295		942	0.0488		942	0.0089
		943	0.0291		943	0.048		943	0.007
		944	0.028		944	0.0474		944	0.0044
		945	0.0277		945	0.0482		945	0.0046
		946	0.0296		946	0.0473		946	0.0038
		947	0.0276		947	0.0445		947	-0.0029
		948	0.0267		948	0.0474		948	0
		949	0.0306		949	0.0483		949	-0.0033
		950	0.0266		950	0.0464		950	-0.0052
		951	0.0271		951	0.0446		951	-0.0086
		952	0.0269		952	0.0434		952	-0.012
		953	0.0277		953	0.0433		953	-0.0123
		954	0.0272		954	0.0443		954	-0.0145
		955	0.0286		955	0.0462		955	-0.018
		956	0.0278		956	0.0454		956	-0.0204
		957	0.0278		957	0.0461		957	-0.0194
		958	0.0308		958	0.0467		958	-0.0188
		959	0.0271		959	0.0462		959	-0.0212
		960	0.0261		960	0.0431		960	-0.0239
		961	0.0271		961	0.0458		961	-0.0202
		962	0.0251		962	0.0428		962	-0.0227
		963	0.0309		963	0.0482		963	-0.0176
		964	0.0276		964	0.0446		964	-0.0176
		965	0.0316		965	0.0483		965	-0.0161
		966	0.0271		966	0.0459		966	-0.0159
		967	0.0296		967	0.0468		967	-0.0162
		968	0.0286		968	0.0459		968	-0.0144
		969	0.0285		969	0.0433		969	-0.0149
		970	0.0266		970	0.0428		970	-0.017
		971	0.025		971	0.0427		971	-0.017
		972	0.0272		972	0.043		972	-0.0165
		973	0.0272		973	0.0437		973	-0.014
		974	0.0282		974	0.0417		974	-0.0148
		975	0.0297		975	0.0446		975	-0.0145
		976	0.0281		976	0.0413		976	-0.0138
		977	0.0293		977	0.0453		977	-0.013
		978	0.0269		978	0.044		978	-0.0161
		979	0.0299		979	0.0468		979	-0.0152
		980	0.0278		980	0.0443		980	-0.0147
		981	0.0233		981	0.0343		981	-0.0155
		982	0.0246		982	0.037		982	-0.0148
		983	0.0296		983	0.0427		983	-0.014
		984	0.0268		984	0.0426		984	-0.0153
		985	0.0286		985	0.0464		985	-0.0123
		986	0.0299		986	0.0437		986	-0.0142
		987	0.0291		987	0.0473		987	-0.0109
		988	0.0294		988	0.0446		988	-0.015
		989	0.0267		989	0.0434		989	-0.0152
		990	0.0304		990	0.0442		990	-0.0141
		991	0.031		991	0.0464		991	-0.014
		992	0.0298		992	0.0481		992	-0.0148
		993	0.0246		993	0.0371		993	-0.0157
		994	0.0244		994	0.0332		994	-0.0157
		995	0.0265		995	0.0385		995	-0.0144
		996	0.0263		996	0.038		996	-0.0162
		997	0.0281		997	0.04		997	-0.0144
		998	0.0286		998	0.0403		998	-0.0129
		999	0.0273		999	0.0422		999	-0.0128
		1000	0.0295		1000	0.044		1000	-0.0131
