# Supplementary material for: Pac-Man bacteria eat nanoprobes for aggregation-enhanced imaging and killing diverse microorganisms
Source: Research Square preprint supplement (doi:10.21203/rs.3.rs-272302/v1), 2021-04-09
Supplement: Supplementary file 2 [file 23ea508af25e549498ed4554.xlsx]

## Sheet: Figure 3f
Figure 3f
		SA	GP-AuNPs@Ce6(-)	Mean FL Intensity				GP-AuNPs@Ce6(+)	Mean FL Intensity
			Ce6	18.637	17.326	18.097		Ce6	9.876	9.327	10.239
			AuNPs	14.988	15.976	15.328		AuNPs	7.332	7.697	8.032
			GP-dAuNPs@Ce6(-)	Mean FL Intensity				GP-dAuNPs@Ce6(+)	Mean FL Intensity
			Ce6	10.032	10.786	10.937		Ce6	58.928	57.737	59.078
			AuNPs	8.327	8.696	7.876		AuNPs	53.876	54.997	54.098

## Sheet: Figure 3g
Figure 3g
	EC		GP-AuNPs@Ce6(-)	Mean FL Intensity			GP-AuNPs@Ce6(+)	Mean FL Intensity
		Ce6	18.027	17.596	18.327		Ce6	10.347	9.976	10.548
		AuNPs	20.078	18.863	20.352		AuNPs	8.627	8.076	8.928
			GP-dAuNPs@Ce6(-)	Mean FL Intensity			GP-dAuNPs@Ce6(+)	Mean FL Intensity
		Ce6	11.328	11.098	11.937		Ce6	53.097	53.586	54.896
		AuNPs	11.394	12.989	12.067		AuNPs	50.328	51.987	51.576

## Sheet: Figure 3h
Figure 3h
PA		GP-AuNPs@Ce6(-)	Mean FL Intensity				GP-AuNPs@Ce6(+)	Mean FL Intensity
		CE6	13.986	13.273	14.038		CE6	9.098	8.327	9.898
		AU	15.687	17.328	16.876		AU	6.986	5.049	6.739
		GP-dAuNPs@Ce6(-)	Mean FL Intensity				GP-dAuNPs@Ce6(+)	Mean FL Intensity
		CE6	11.328	11.097	10.376		CE6	51.078	52.329	53.663
		AU	6.997	8.526	8.979		AU	54.327	53.087	52.987

## Sheet: Figure 3i
Figure 3i
		GP-AuNPs@Ce6(-)	Mean FL Intensity				GP-AuNPs@Ce6(+)	Mean FL Intensity
	ML	Ce6	15.28	16.427	15.784		Ce6	8.997	7.367	7.19
		AuNPs	13.227	12.689	12.968		AuNPs	6.496	5.054	5.837
		GP-dAuNPs@Ce6(-)	Mean FL Intensity				GP-dAuNPs@Ce6(+)	Mean FL Intensity
		Ce6	9.032	8.763	9.578		Ce6	55.779	55.086	53.327
		AuNPs	6.987	7.48	7.896		AuNPs	52.863	52.045	51.576
