# Supplementary material for: Pac-Man bacteria eat nanoprobes for aggregation-enhanced imaging and killing diverse microorganisms
Source: Research Square preprint supplement (doi:10.21203/rs.3.rs-272302/v1), 2021-04-09
Supplement: Supplementary file 3 [file 42601b51f1fa35ee25d2790e.docx]

**Supporting Information**

Pac-Manbacteria eat nanoprobes for aggregation-enhanced imaging and killing diverse microorganisms

Yunmin Yang,‡ Binbin Chu,‡ Jiayi Cheng, Jiali Tang, Bin Song, Houyu Wang* & Yao He*

Laboratory of Nanoscale Biochemical Analysis, Institute of Functional Nano and Soft Materials (FUNSOM), and Collaborative Innovation Center of Suzhou Nano Science and Technology, Soochow University, Suzhou 215123, China

* Corresponding authors. Email: houyuwang@suda.edu.cn; yaohe@suda.edu.cn

‡ These authors contributed equally.


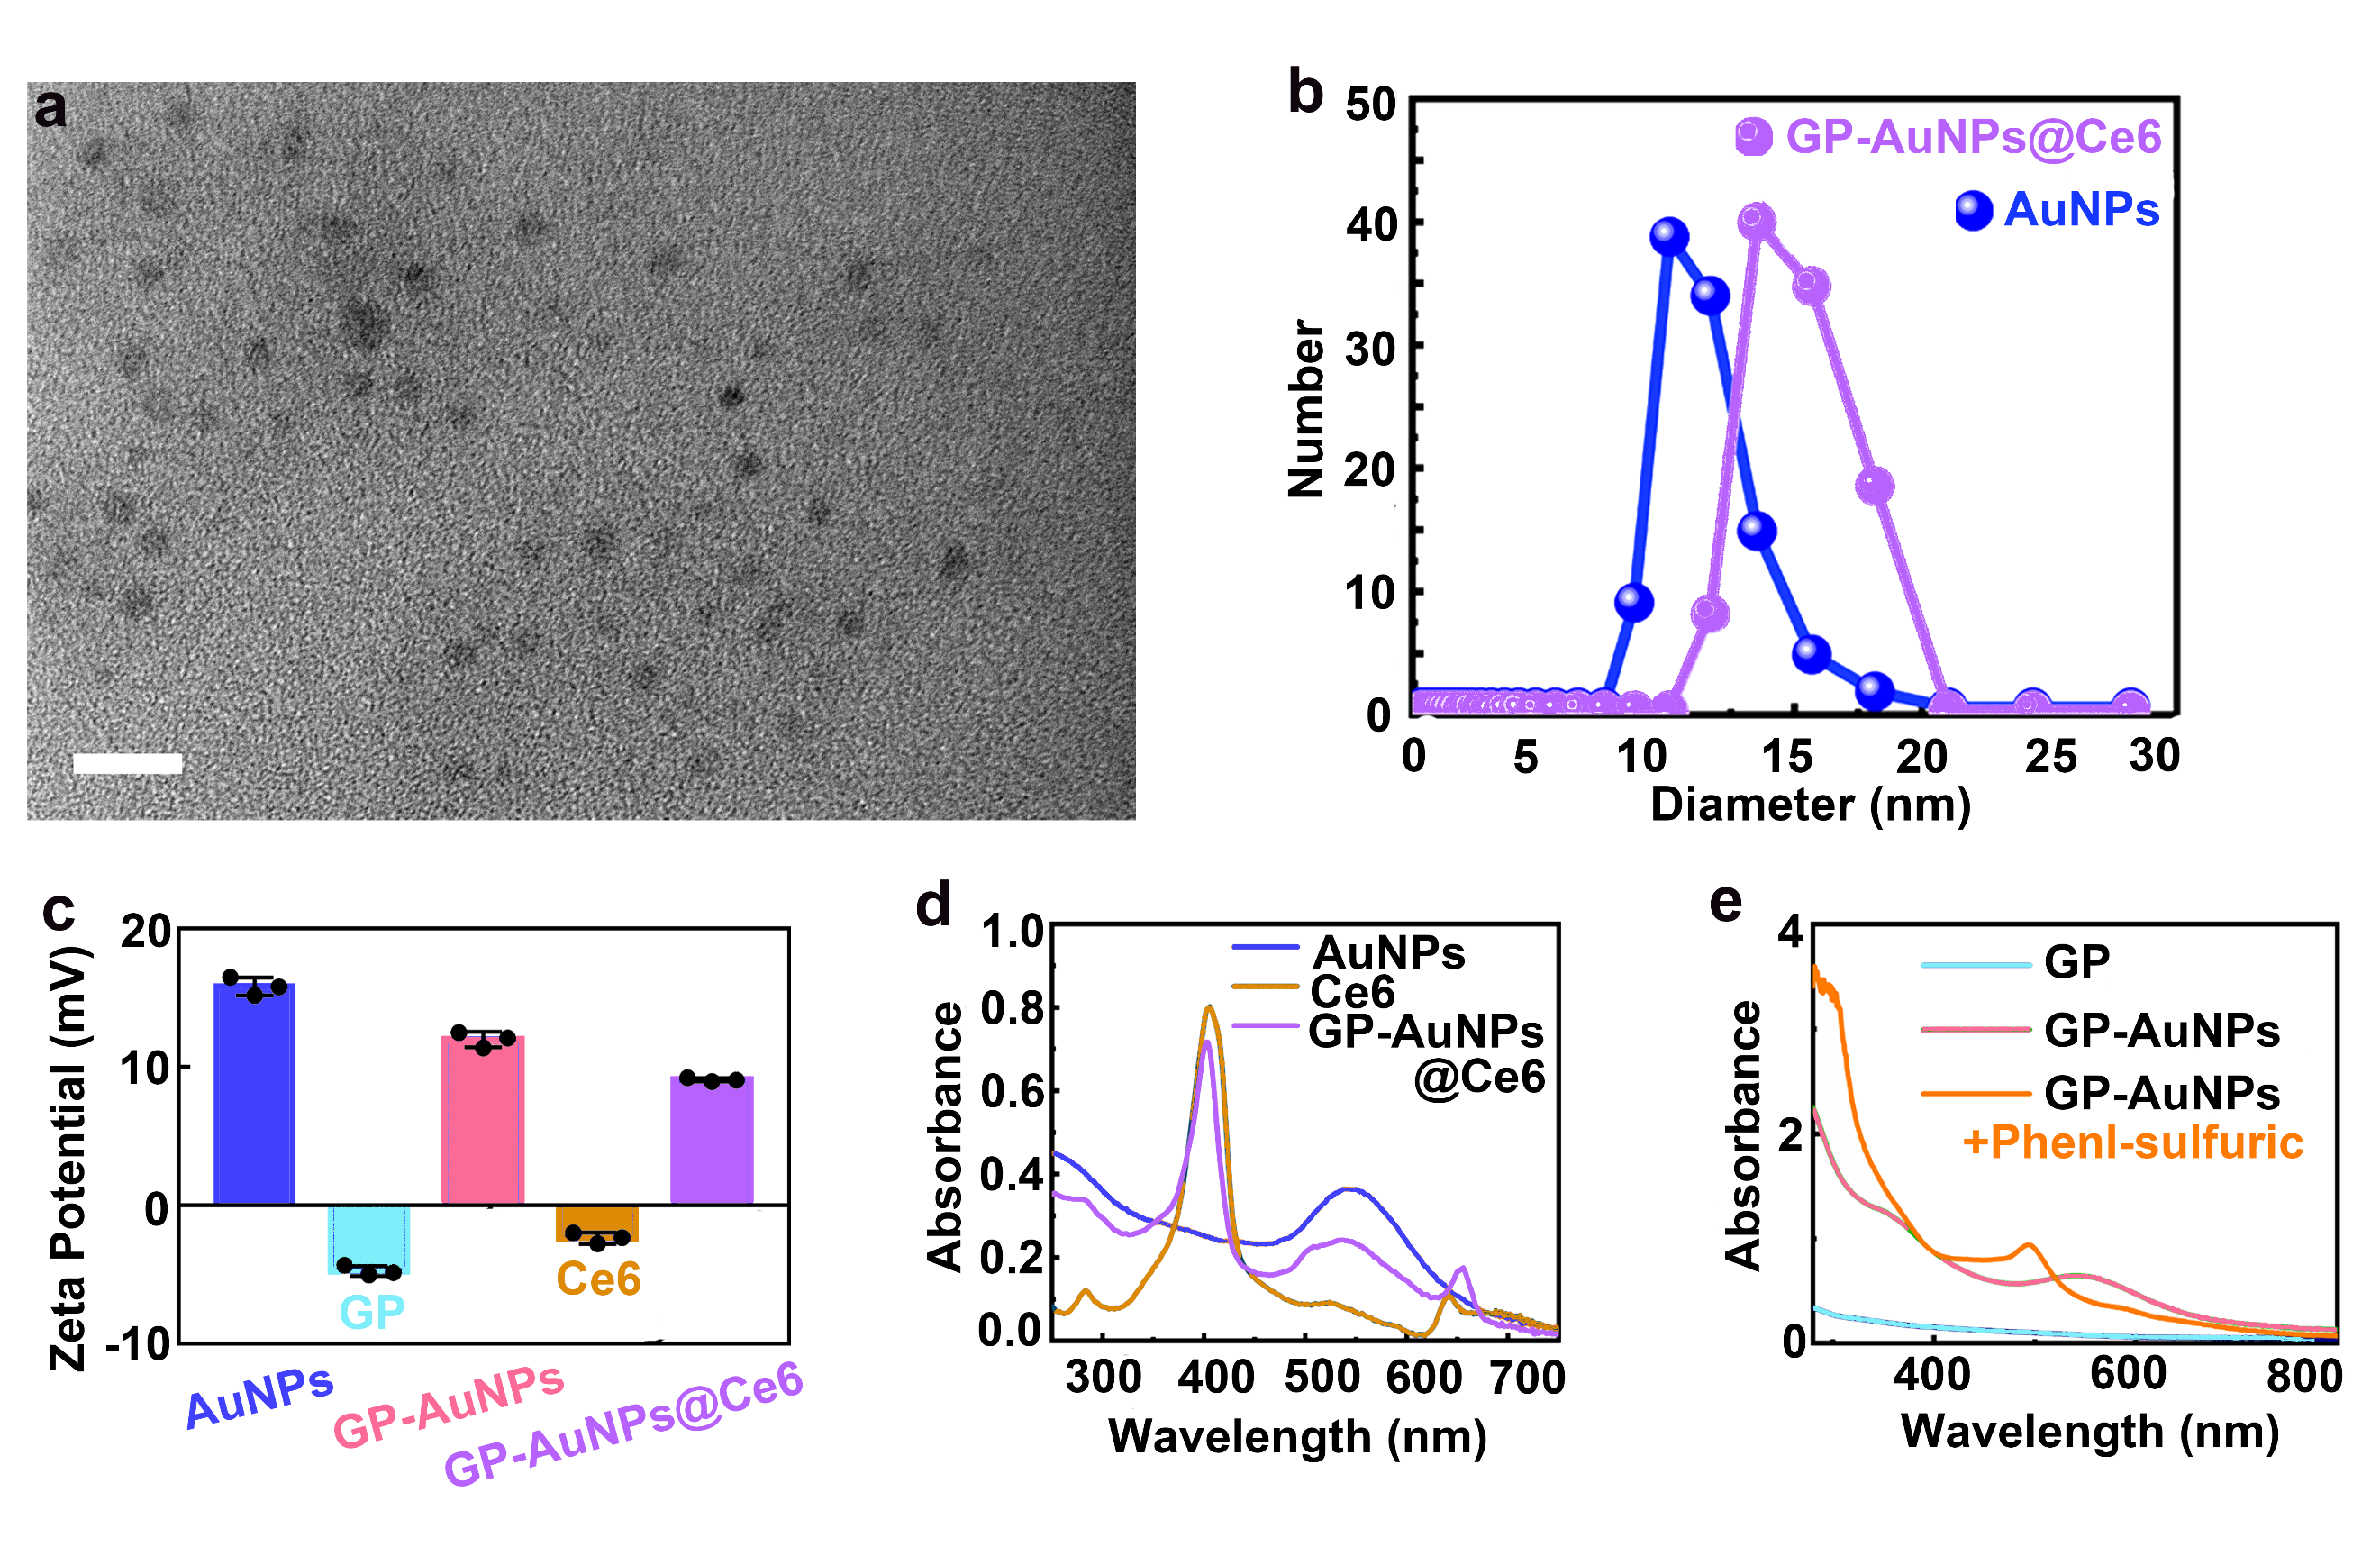


**Supplementary Fig. 1. Characterization of GP-AuNPs and GP-AuNPs@Ce6. a**, TEM images of GP-AuNPs@Ce6. Scale bar, 20 nm. **b**, The DLS analysis of GP-AuNPs@Ce6 and AuNPs. **c**, Zeta Potentials of pure GP, Ce6, AuNPs, GP-AuNPs, and GP-AuNPs@Ce6. **d**, Absorption spectra of Ce6, AuNPs, and GP-AuNPs@Ce6. **e**, Absorption spectra of GP, GP-AuNPs and GP-AuNPs reacted with phenl-sulfuric. Error bars represent the standard deviation obtained from three independent measurements. Source data are provided as a Source Data file.


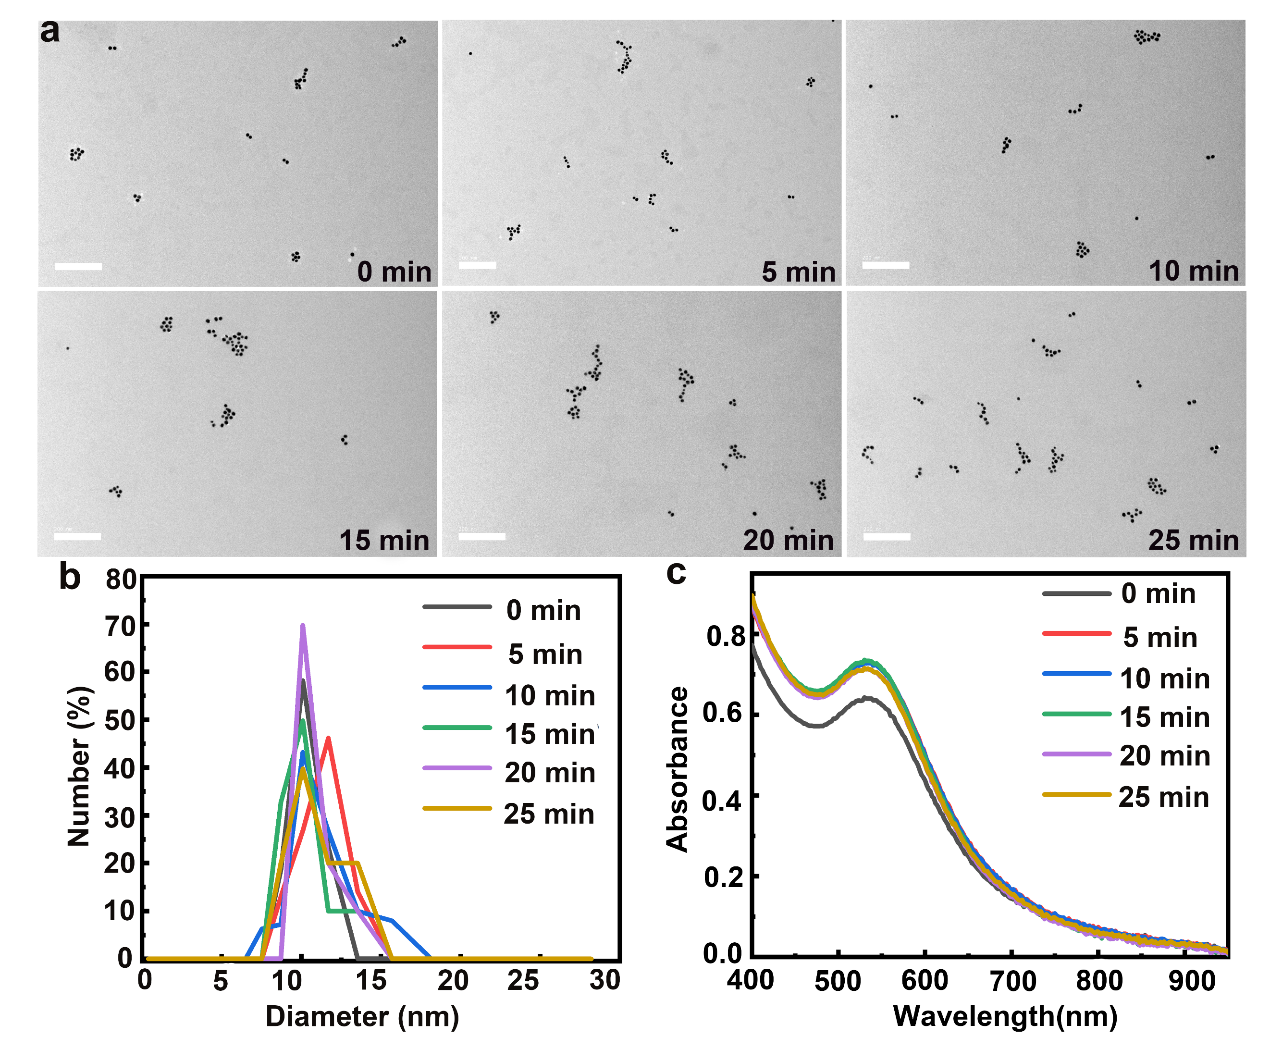


**Supplementary Fig. 2. Characterization of AuNPs treated with 405-nm laser irradiation.** **a,** Irradiation time-dependent TEM images of AuNPs. Scale bars, 200 nm. **b**, Corresponding irradiation time-dependent hydrodynamic size profiles of AuNPs. **c**, Corresponding irradiation time-dependent absorption spectra of AuNPs. Laser: 405 nm, 1.0 W cm-2. Source data are provided as a Source Data file.


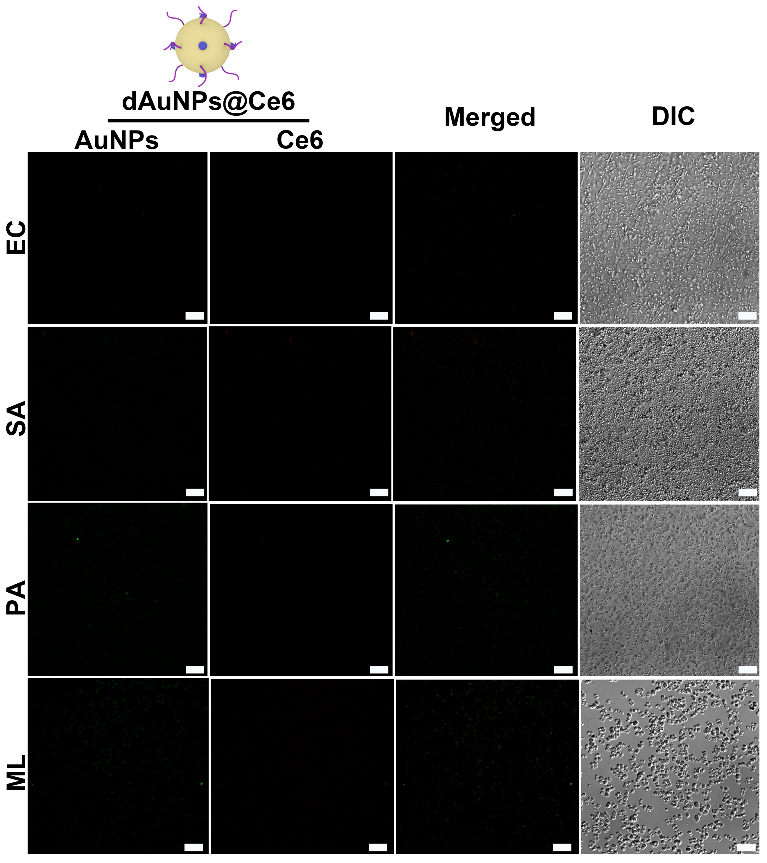


**Supplementary Fig. 3. CLSM images of dAuNPs@Ce6-treated bacteria.** Confocal images of four kinds of bacteria (e.g., *S. aureus* (SA), *E. coli* (EC), *M. luteus* (ML), *P. aeruginosa* (PA)) after the incubation with 1.0 mg mL-1 dAuNPs@Ce6. After incubation, the treated bacteria were rinsed with PBS buffer for several times. The bacterial cell concentration is ~107 CFU. Scale bars, 10 μm.


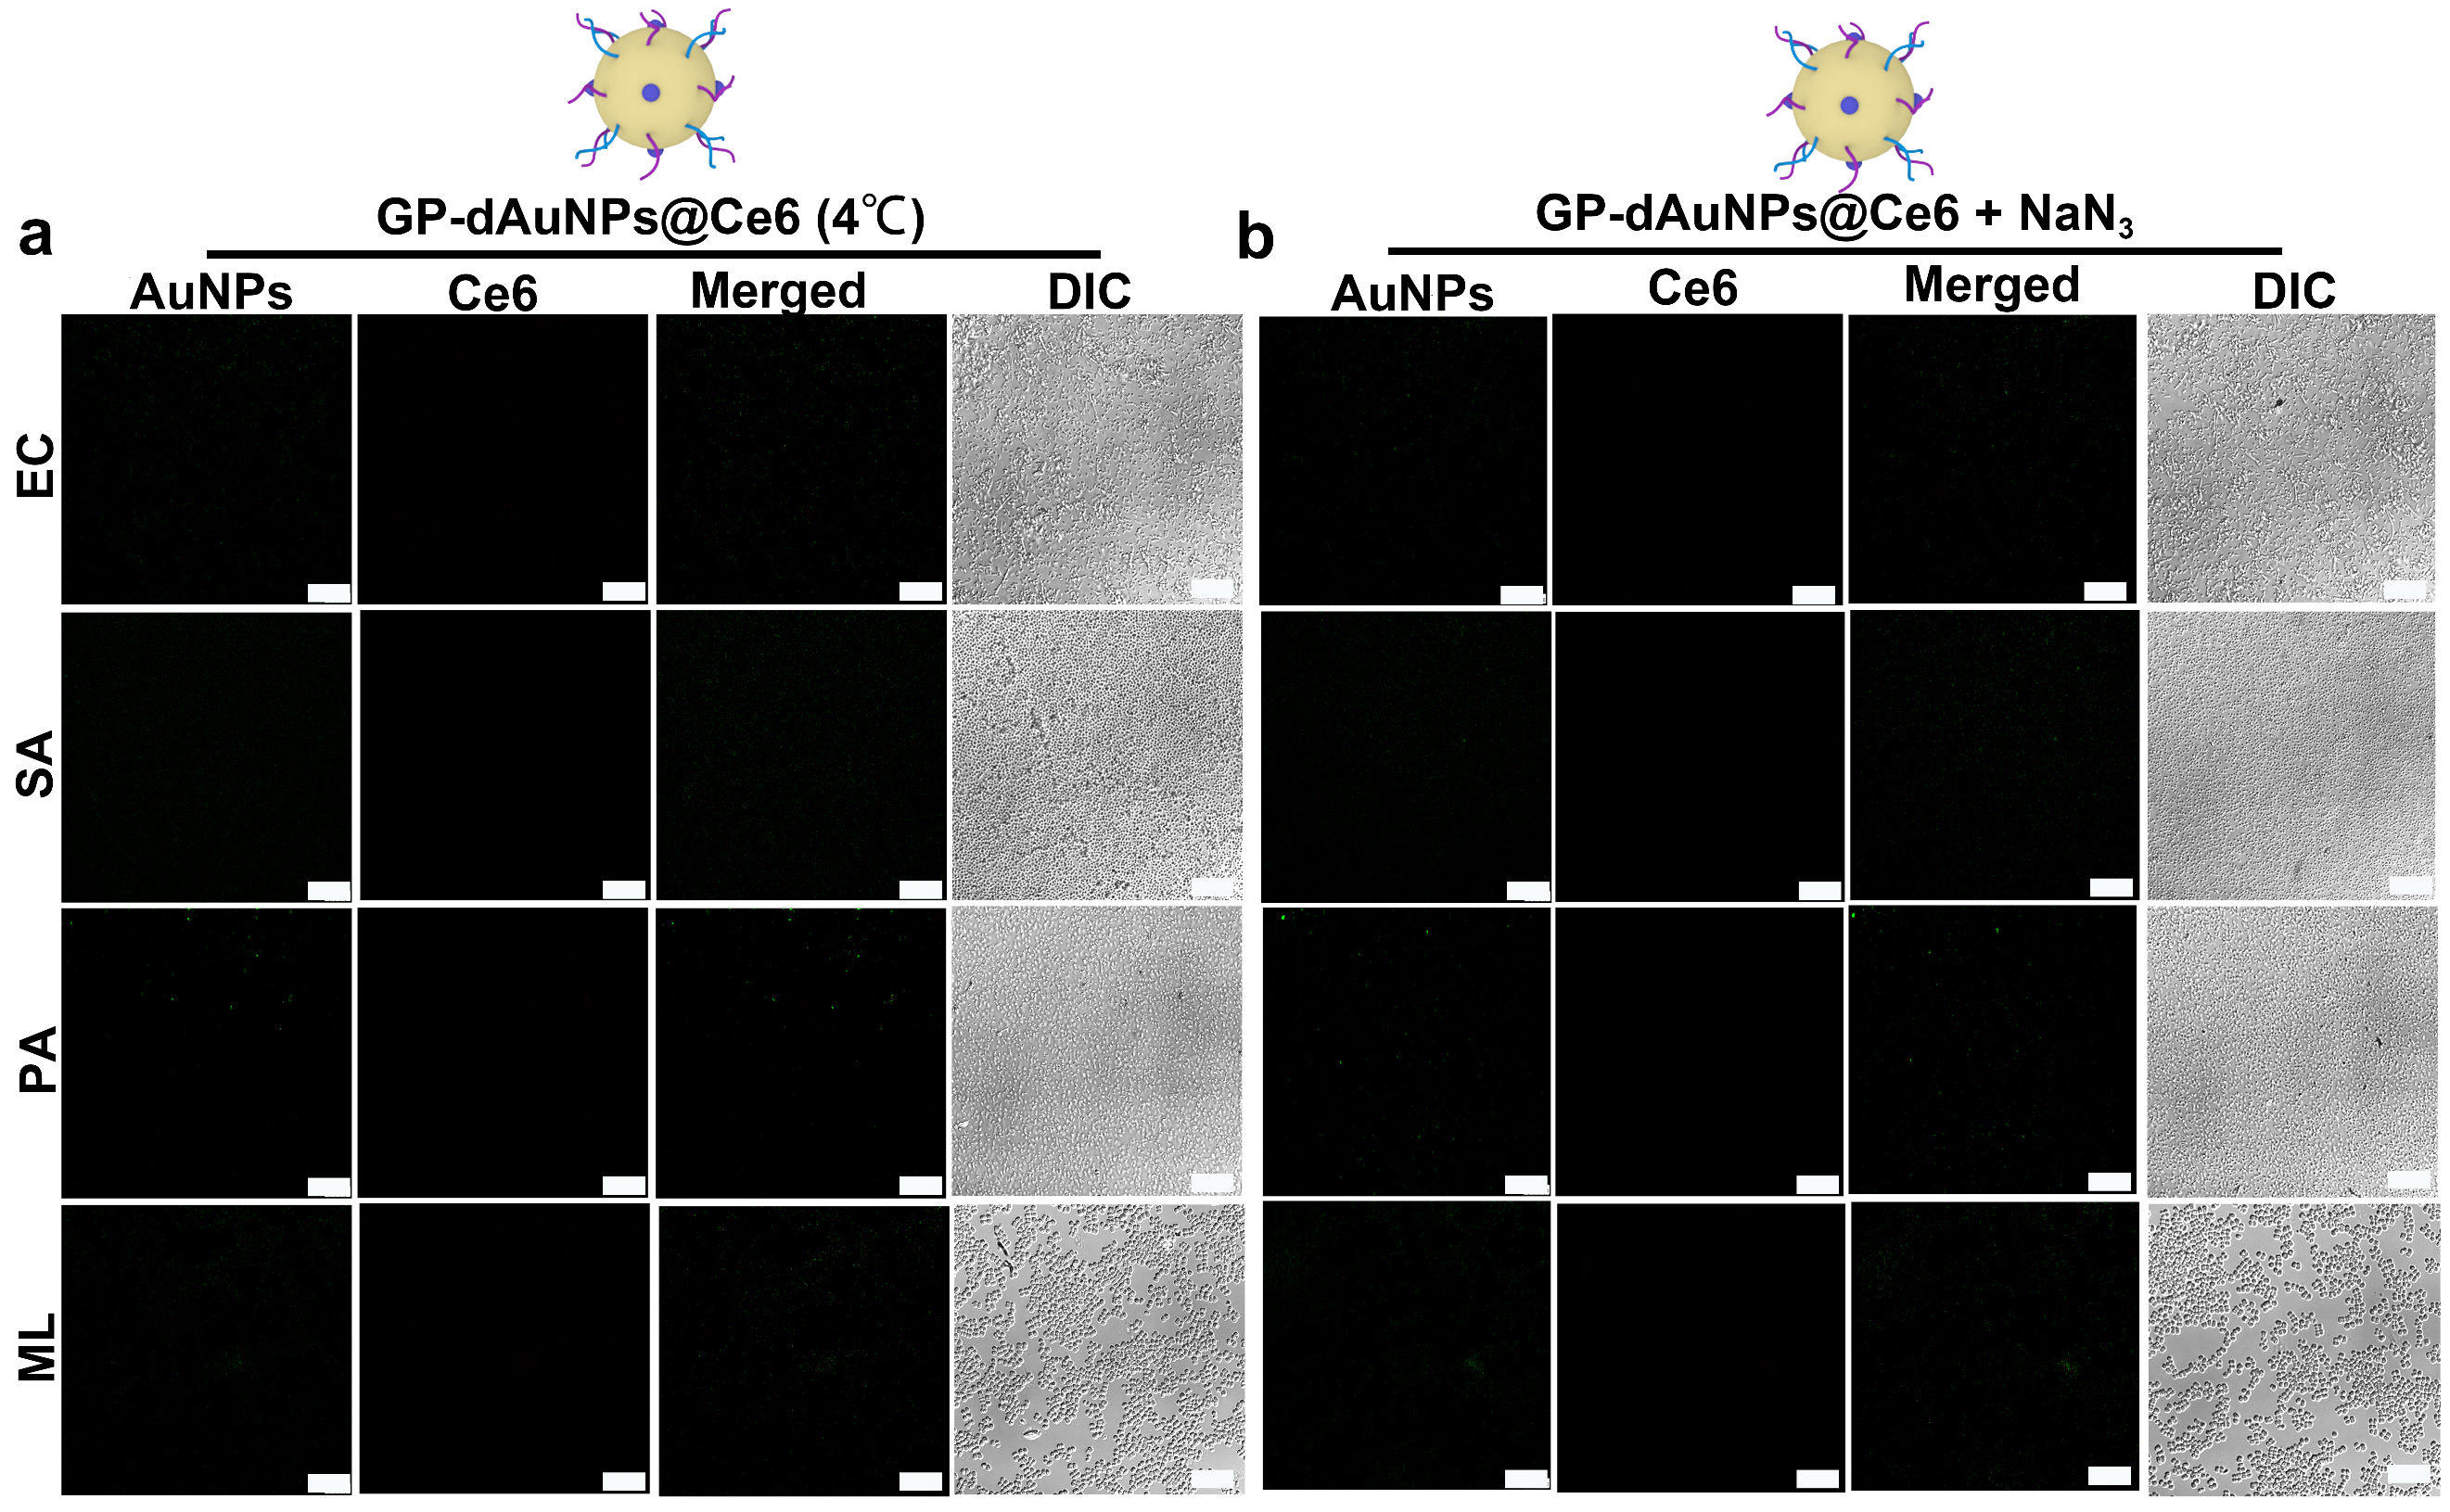


**Supplementary Fig. 4.** **CLSM images of GP-dAuNPs@Ce6-treated bacteria in different conditions. a**, Confocal images of four kinds of bacteria (*e.g.*, *S. aureus* (SA), *E. coli* (EC), *M. luteus* (ML), *P. aeruginosa* (PA)) treated by 1.0 mg mL-1 GP-dAuNPs@Ce6 at 4 oC. **b**,Confocal images of four kinds of bacteria (*e.g.*, *S. aureus* (SA), *E. coli* (EC), *M. luteus* (ML), *P. aeruginosa* (PA)) treated by 1.0 mg mL-1 GP-dAuNPs@Ce6 after the treatment of NaN3. After incubation, the treated bacteria were rinsed with PBS buffer for several times. The bacterial cell concentration is ~107 CFU. Scale bars, 10 μm.


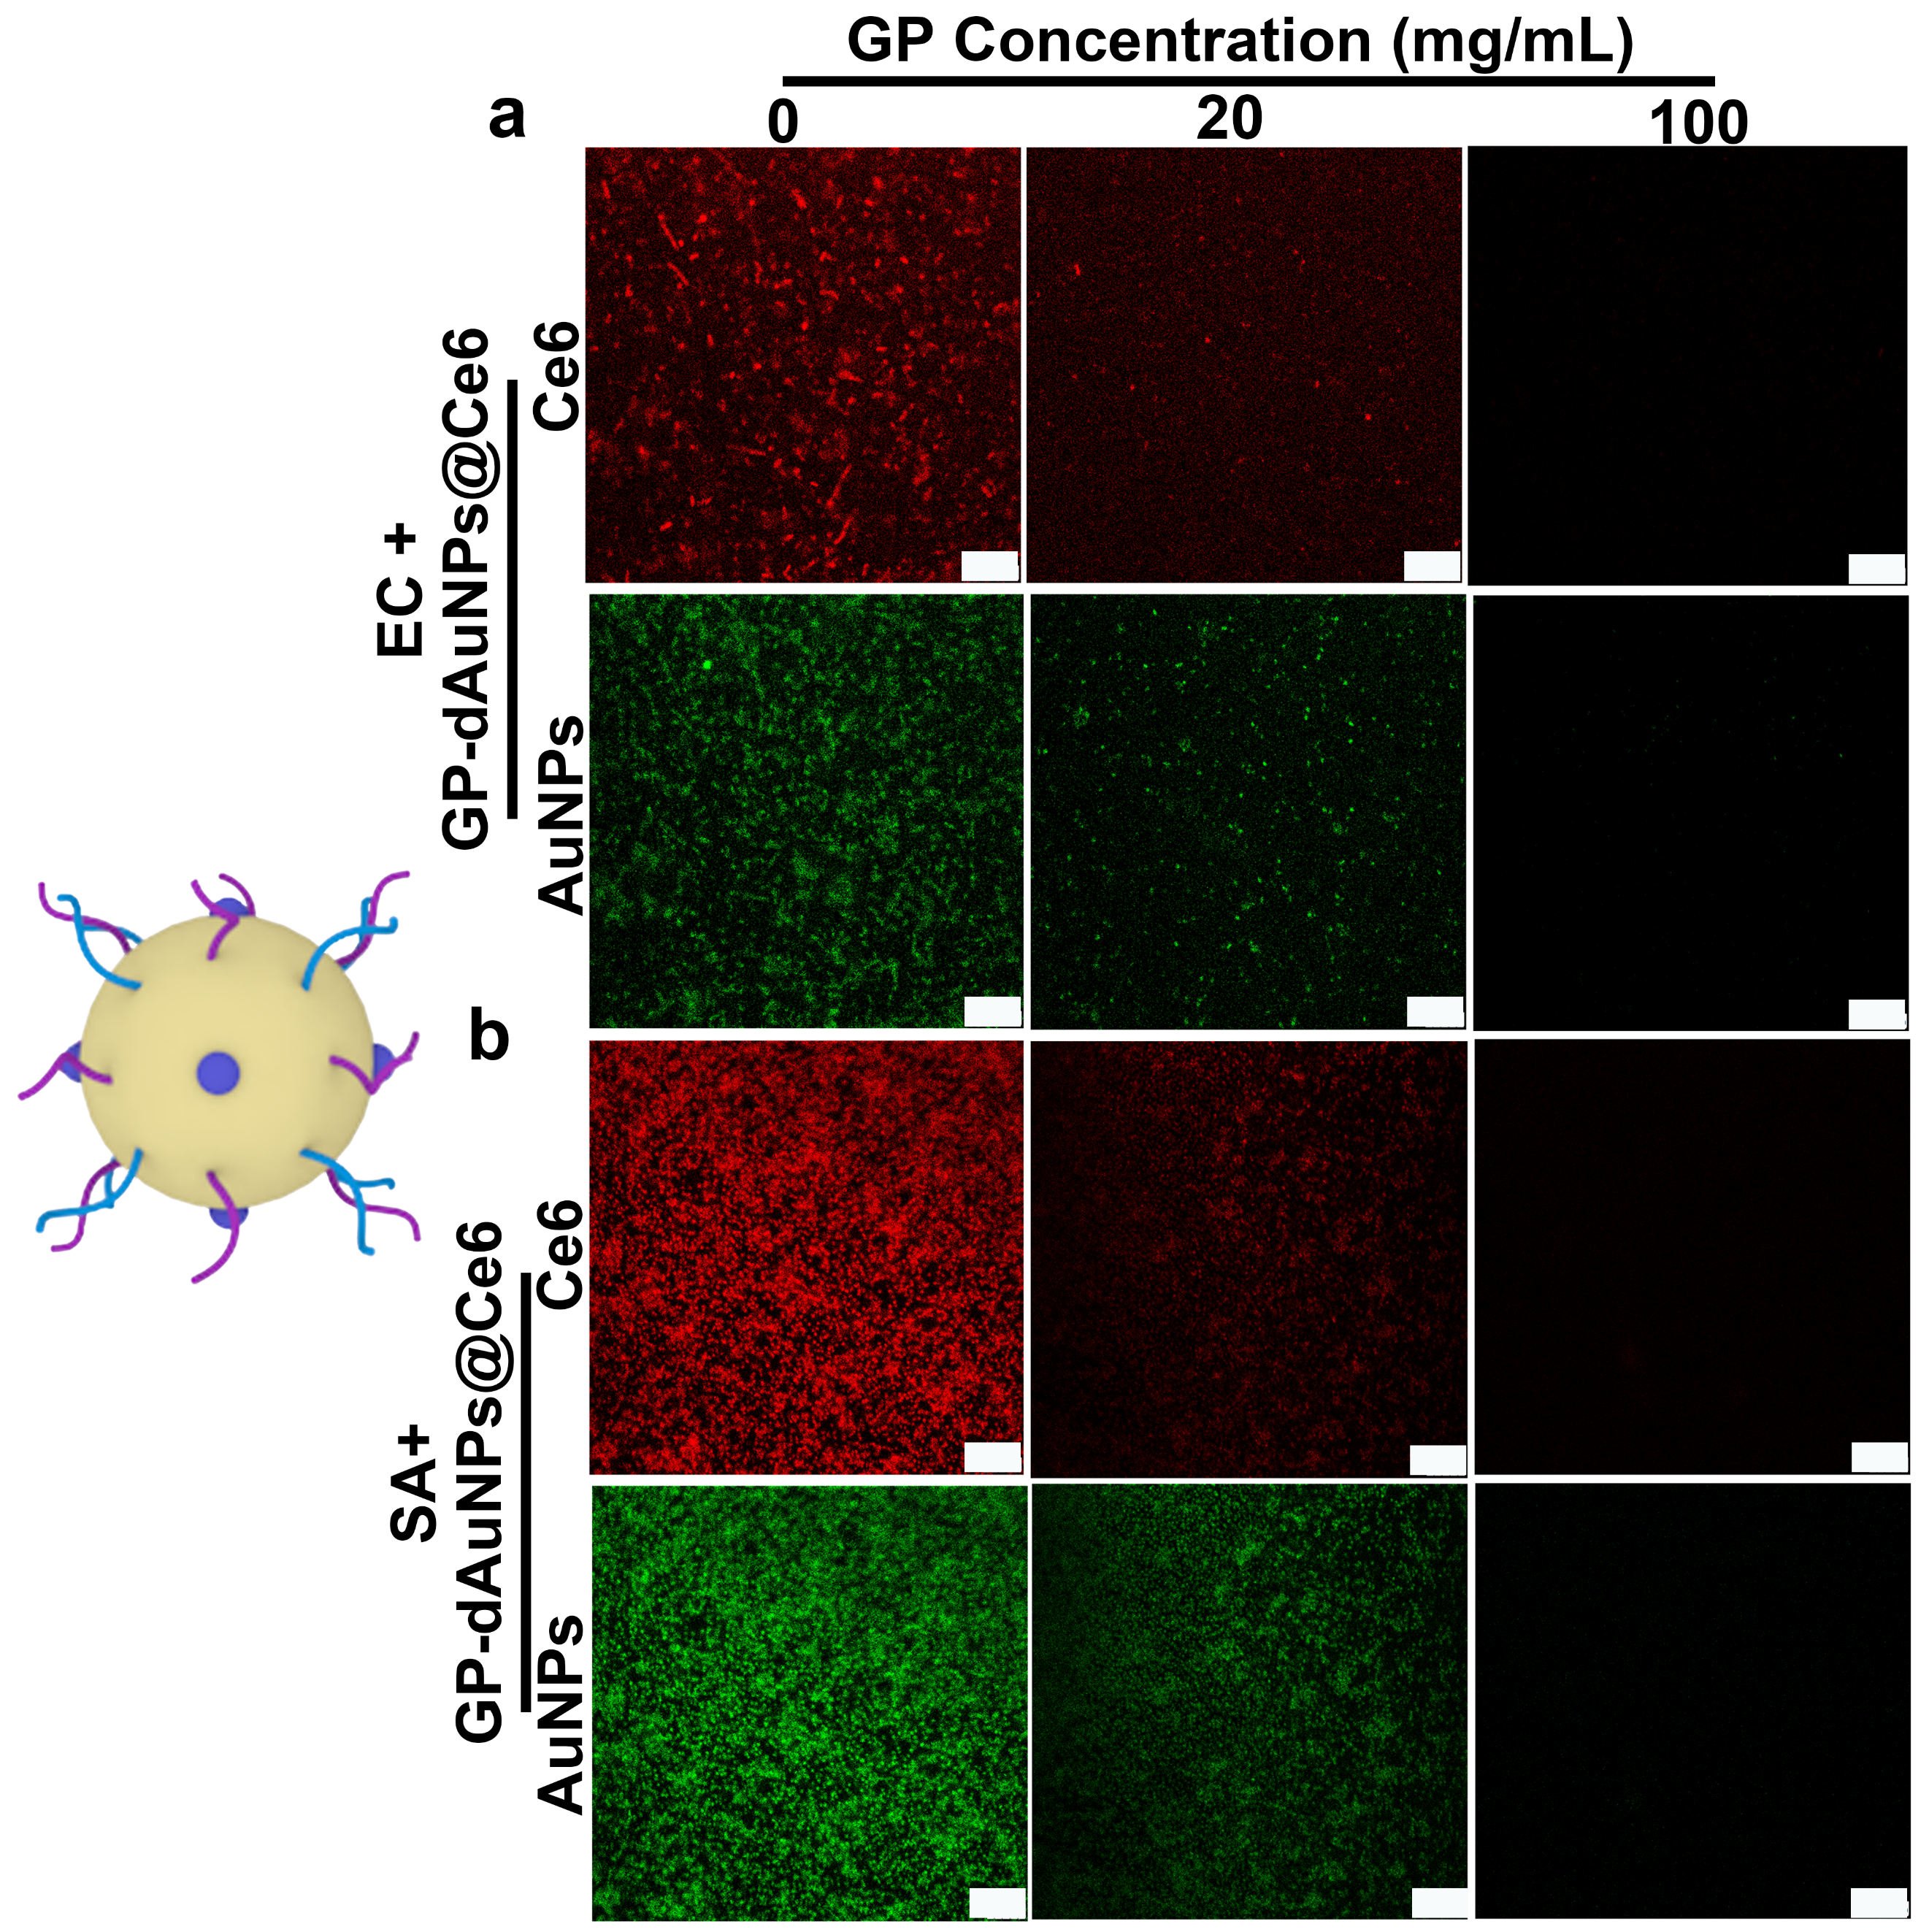


**Supplementary Fig. 5. CLSM images of the GP-dAuNPs@Ce6-treated bacteria after treatments of pure GP with different concentrations.** Confocal fluorescence images of EC and SA incubated with GP with different concentrations (*e.g.*, 0, 20, 100 mg mL-1) for 5 min and then incubated with 1.0 mg mL-1 GP-dAuNPs@Ce6 for another 2 h. After incubation, the treated bacteria were rinsed with PBS buffer for several times. The bacterial cell concentration is ~107 CFU. Scale bars, 10 μm.


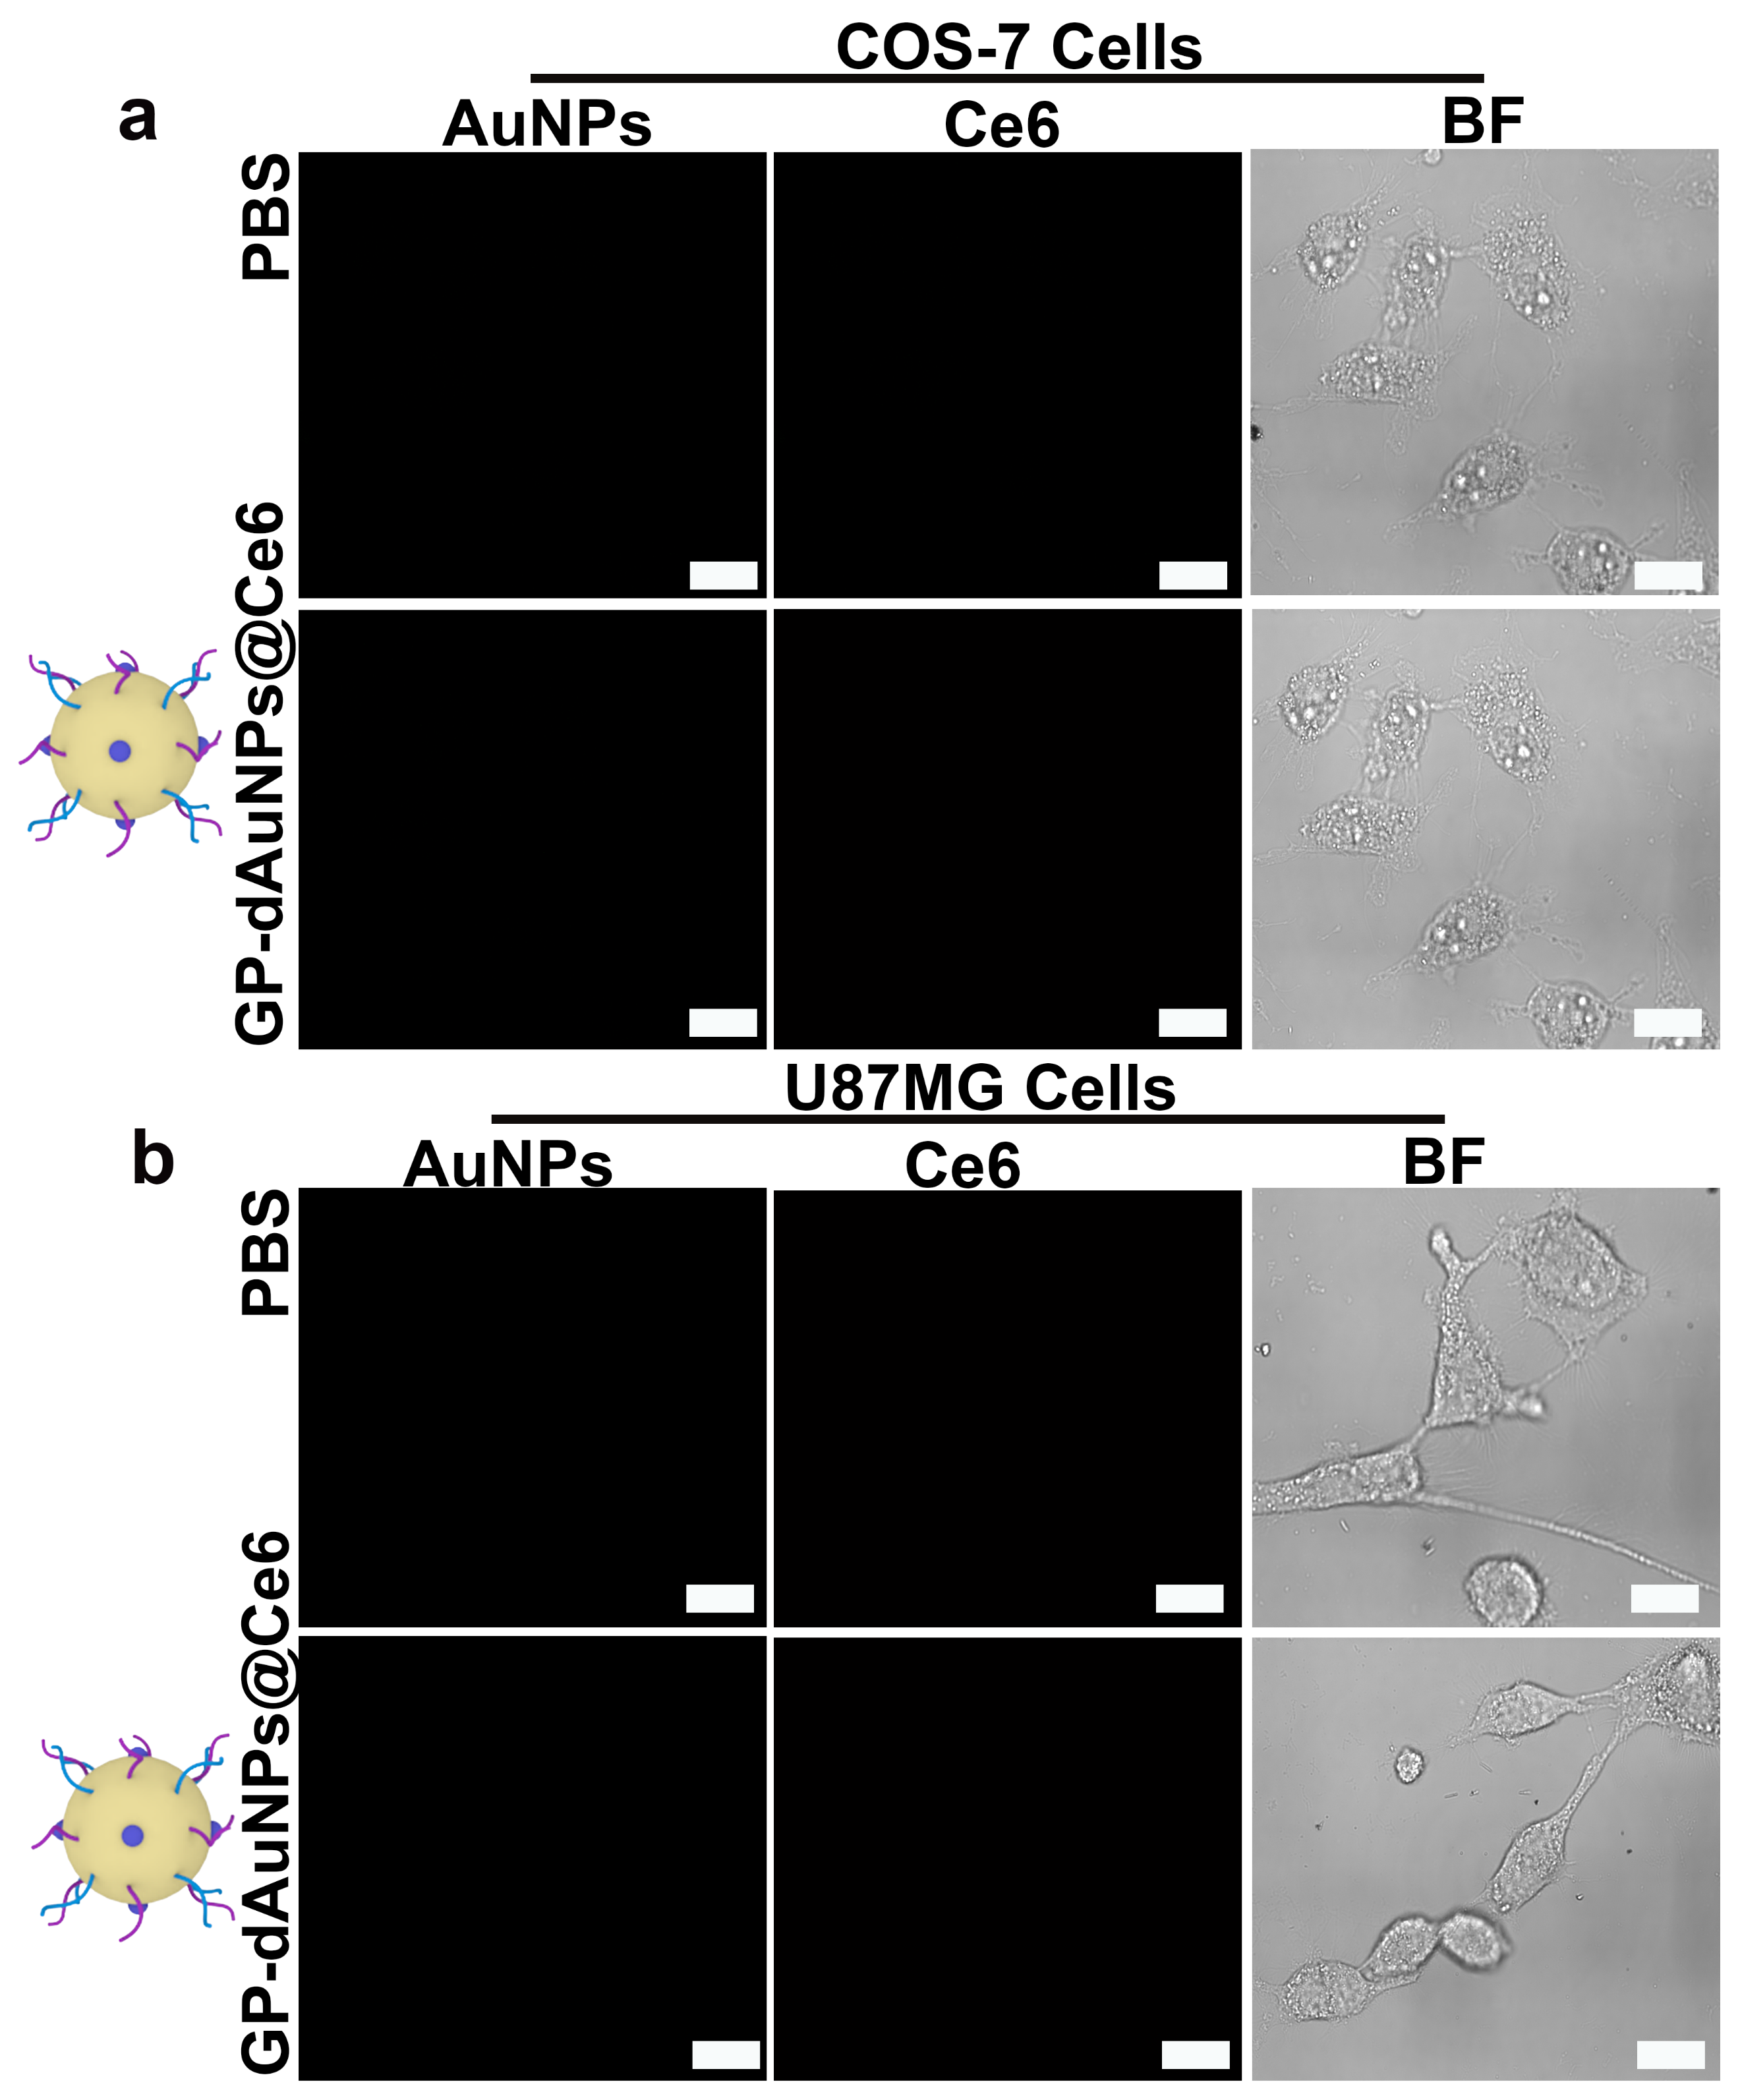


**Supplementary Fig. 6**. **CLSM images of GP-dAuNPs@Ce6-treated cells.** Confocal fluorescence images of (**a**) COS-7 cells and (**b**) U87MG cells after co-incubation with 1.0 mg mL-1 GP-dAuNPs@Ce6 for 2h. After incubation, the treated cells were rinsed with PBS buffer for several times. Scale bars, 25 μm.


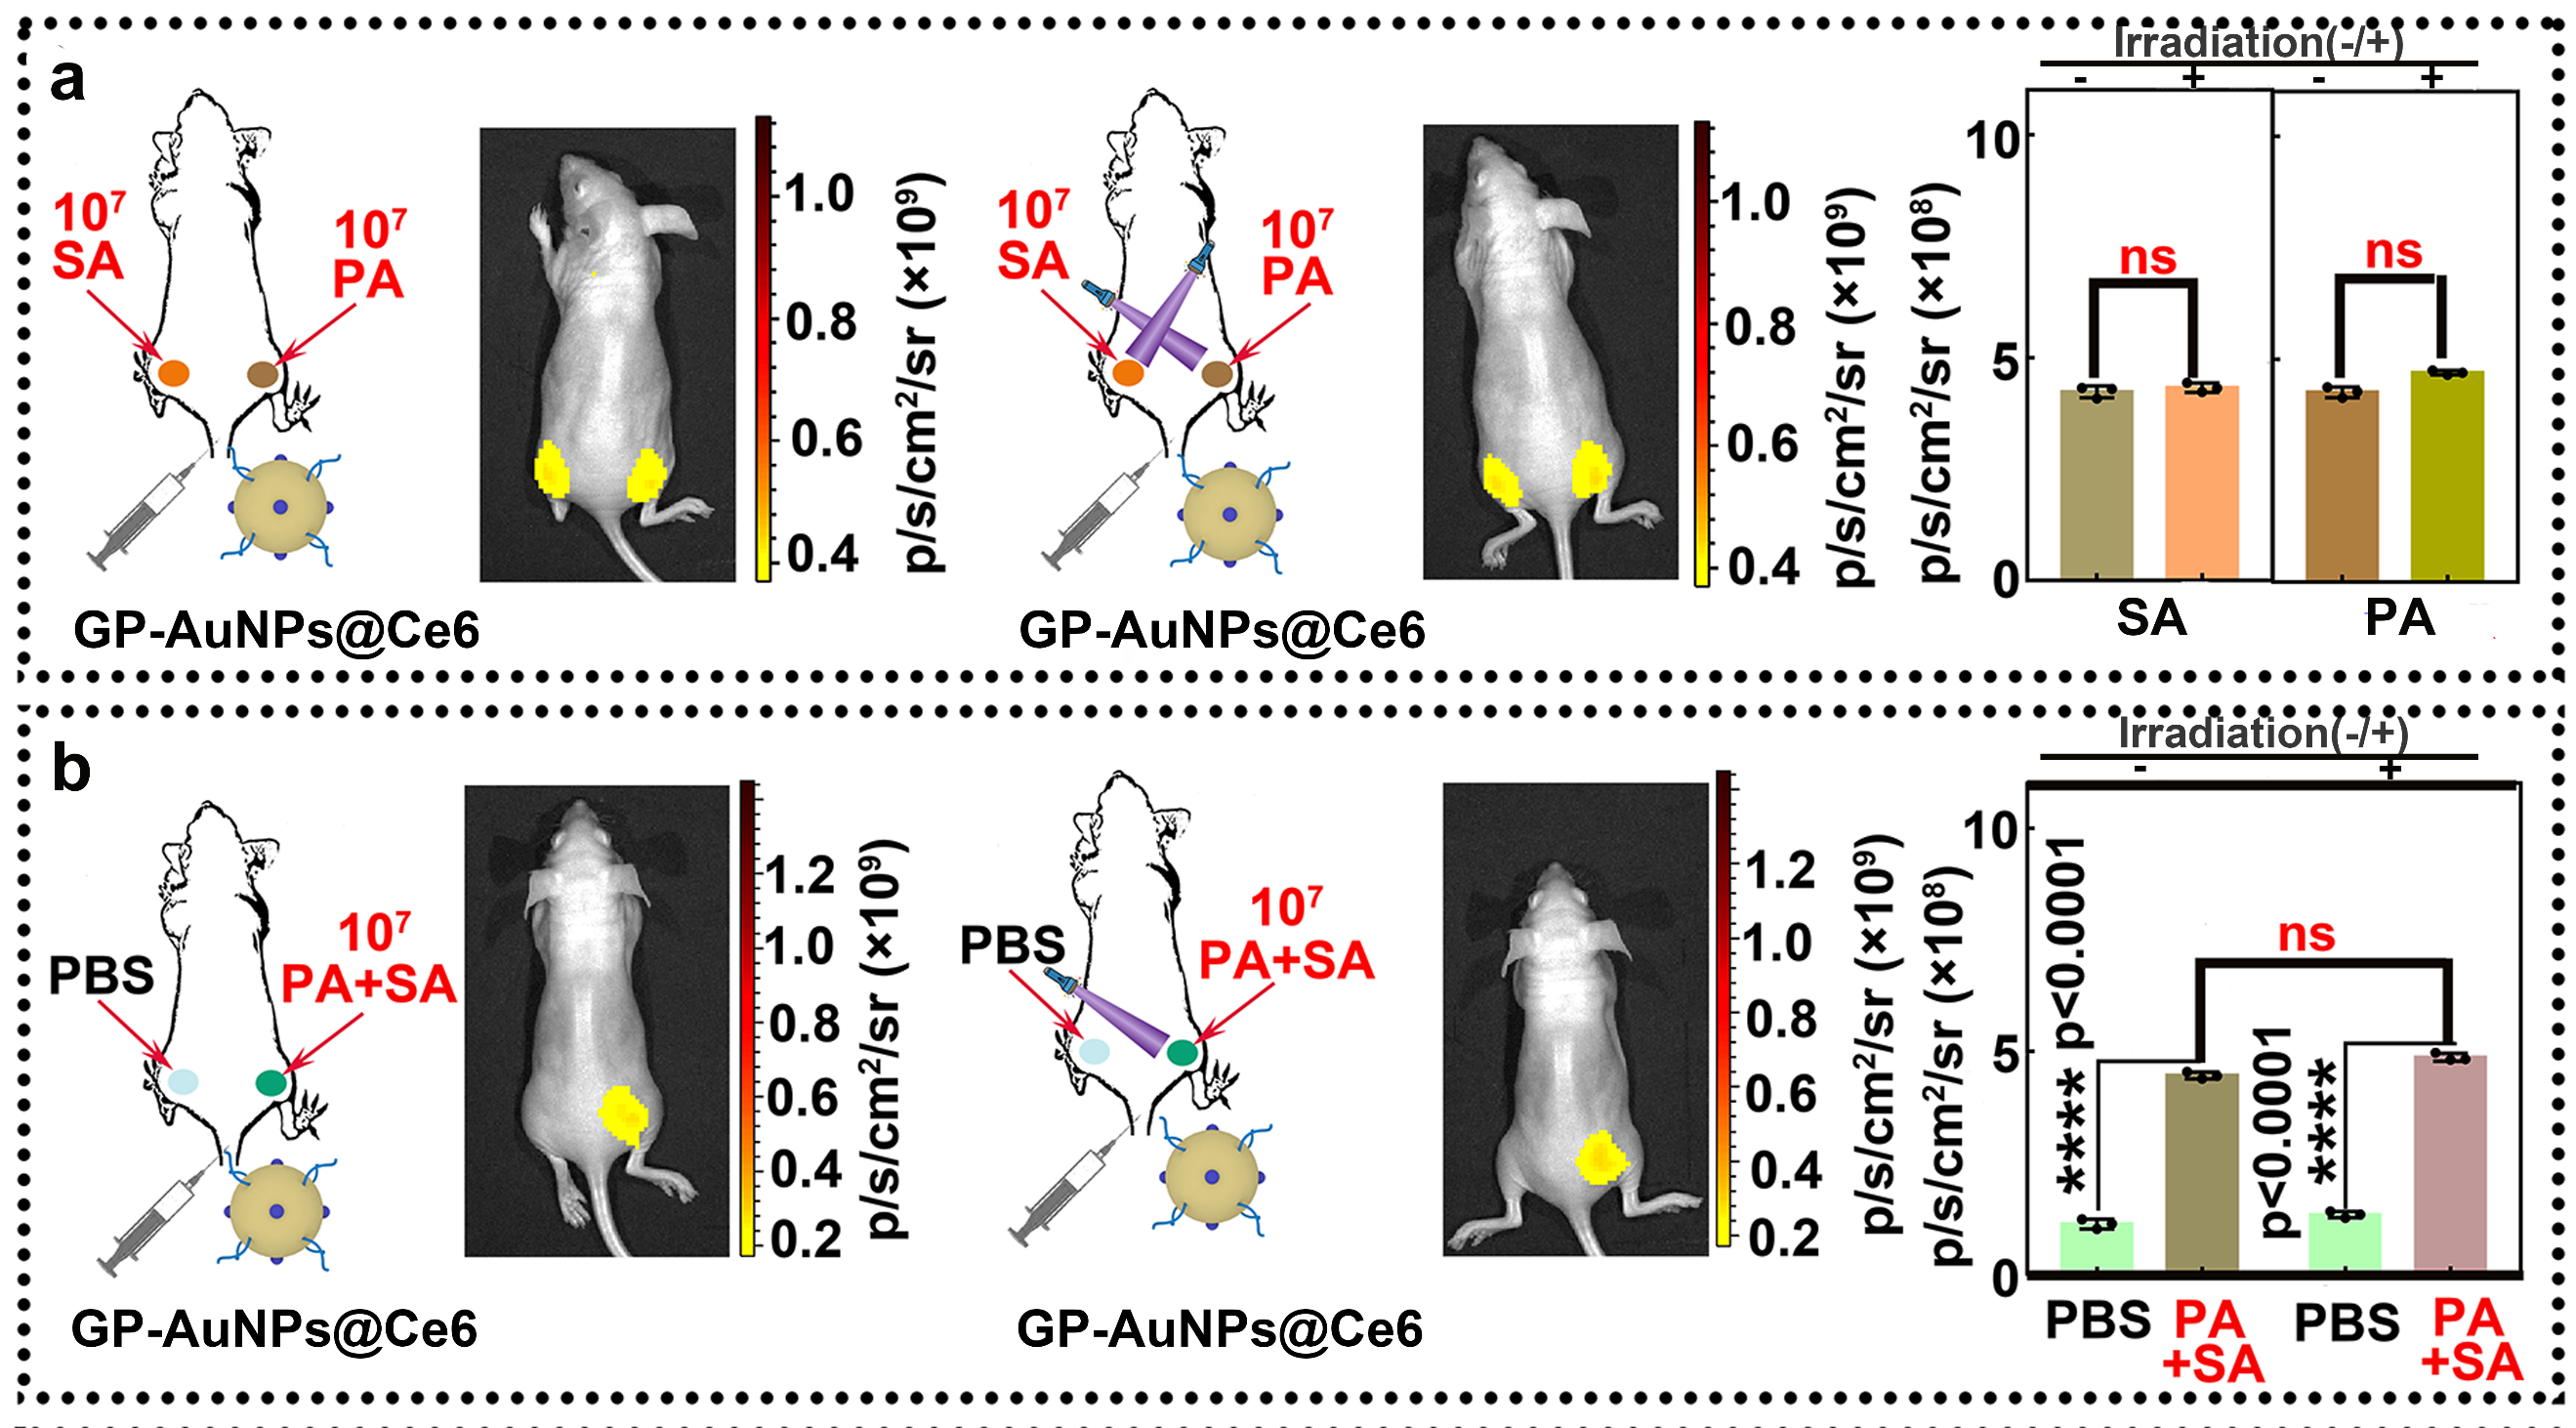


**Supplementary Fig. 7. *In vivo* imaging of bacteria in superficial tissues of mice treated with GP-AuNPs@Ce6. a**, *In vivo* imaging of PA (right side) and SA (left side)-infected sites of mice treated with 1.0 mg mL-1 GP-AuNPs@Ce6 with and without 405-nm laser irradiation and corresponding histograms of mean fluorescence intensity at two sites. The bacterial cell concentration during imaging is ~107 CFU. **b**,*In vivo* imaging of mixture of PA and SA (PA + SA, right side) and PBS (left side)-treated sites of mice injected with GP-AuNPs@Ce6 with and without 405-nm laser irradiation and corresponding histograms of mean fluorescence intensity at two sites. The bacterial cell concentration during imaging is ~107 CFU. Statistical analysis is performed using a one-way ANOVA analysis. Error bars represent the standard deviation obtained from three independent measurements (**** means p< 0.0001, ns means no significance, n = 3). The cartoons are created by Dr. Houyu Wang. Source data are provided as a Source Data file.


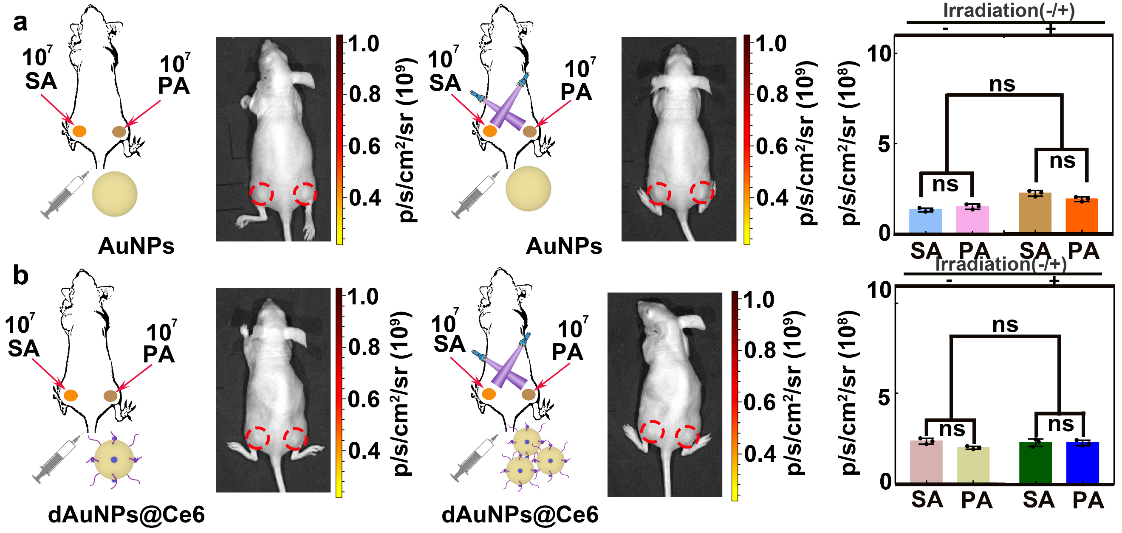


**Supplementary Fig. 8. *In vivo* imaging of bacteria in superficial tissues of mice treated by AuNPs or dAuNPs@Ce6. a**, *In vivo* imaging of PA (right side) and SA (left side)-infected sites of mice treated with 1.0 mg mL-1 AuNPs with and without 405-nm laser irradiation and corresponding histograms of mean fluorescence intensity at two sites. The bacterial cell concentration during imaging is ~107 CFU. **b**, *In vivo* imaging of PA (right side) and SA (left side)-infected sites of mice treated with 1.0 mg mL-1 dAuNPs@Ce6 with and without 405-nm laser irradiation and corresponding histograms of mean fluorescence intensity at two sites. The bacterial cell concentration during imaging is ~107 CFU.Statistical analysis is performed using a one-way ANOVA analysis. Error bars represent the standard deviation obtained from three independent measurements (ns means no significance, n = 3). Source data are provided as a Source Data file.

**Cytotoxicity of the GP-dAuNPs@Ce6.**


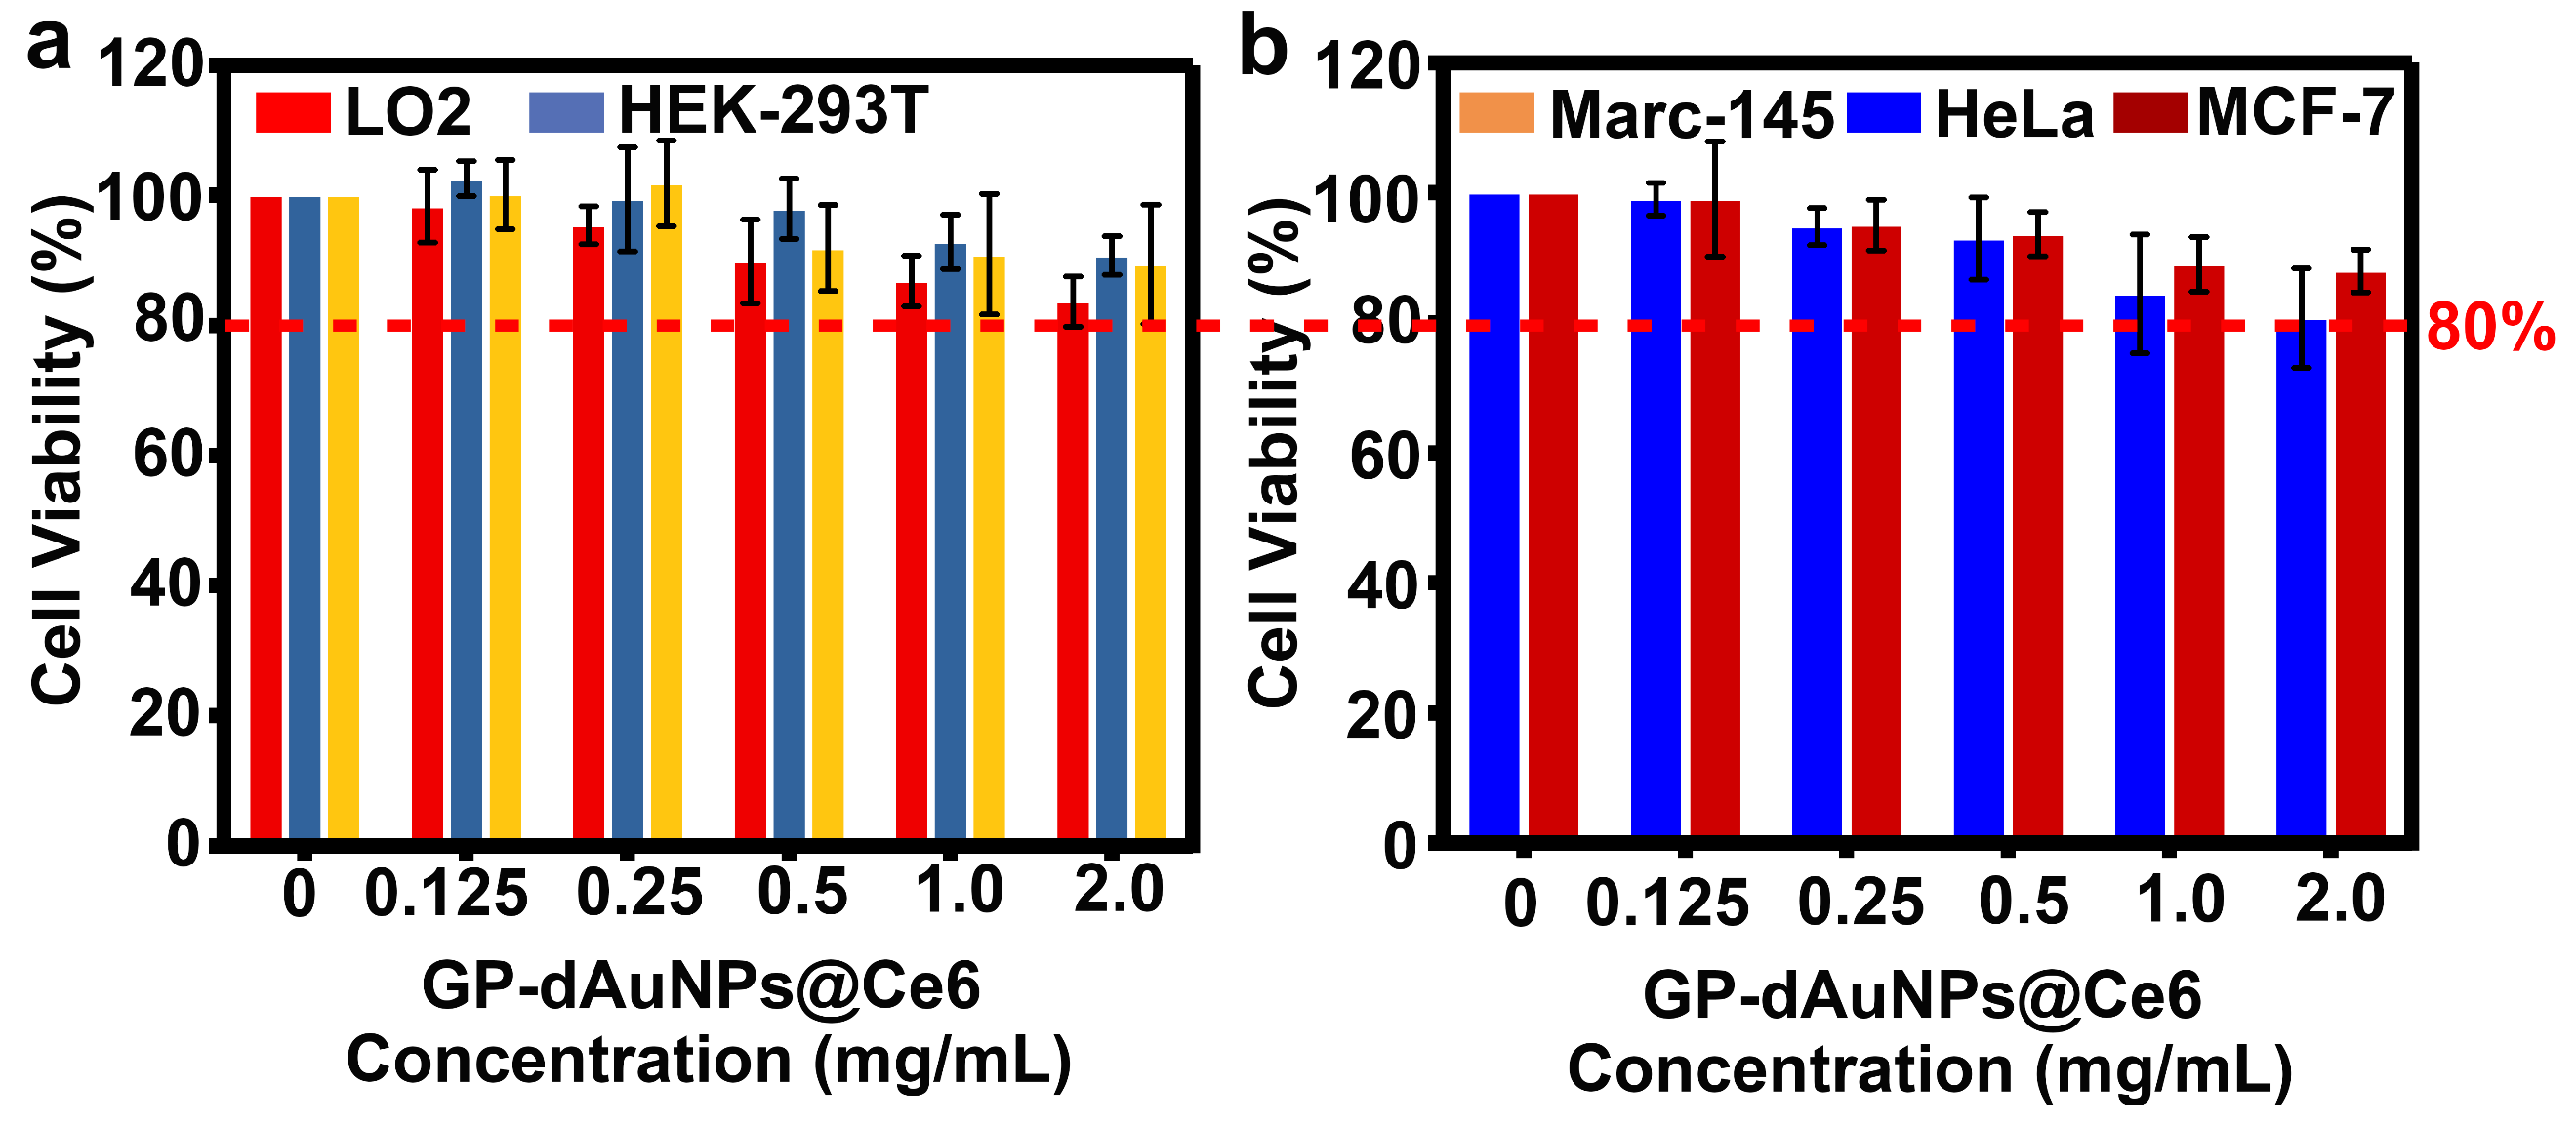


**Supplementary Fig. 9. Cytotoxicity of the prepared GP-dAuNPs@Ce6.** Cell viability of LO2, HEK-293T, Marc-145, HeLa and MCF-7 cells treated with different dosages of the resultant GP-dAuNPs@Ce6 for 24 h. Error bars represent the standard deviation obtained from three independent measurements. Source data are provided as a Source Data file.


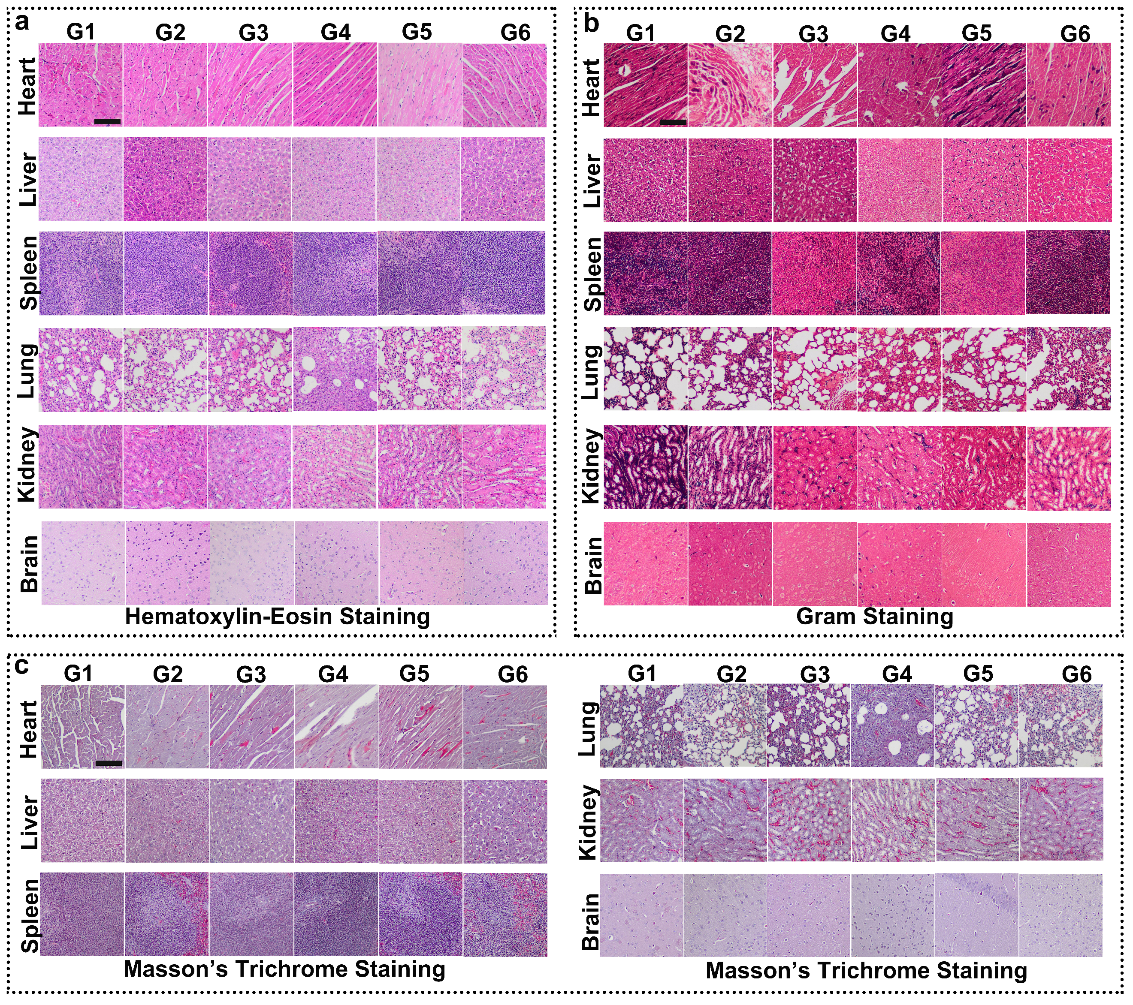


**Supplementary Fig. 10. *In vivo* toxicity assessments of GP-dAuNPs@Ce6. a**，H & E staining of histological evaluation of different organs (heart, liver, spleen, lung, kidney, and brain) harvested from treated mice for 30 days. Scale bars, 50 μm. **b**, Gram staining of different organs (heart, liver, spleen, lung, kidney, and brain) harvested from treated mice for 30 days. Scale bars, 50 μm. **c**, Masson’s trichrome staining of different organs (heart, liver, spleen, lung, kidney, and brain) harvested from treated mice for 30 days. The mice in group 1 (G1) are treated with GP-dAuNPs@Ce6+660-nm laser (12 mW cm-2, 5 min); The mice in group 2 (G2) are treated with GP-dAuNPs@Ce6+808-nm laser (1.0 W cm-2, 5 min); the mice in group 3 (G3) are treated by GP-dAuNPs@Ce6+660-nm laser (12 mW cm-2, 5 min)+ 808-nm laser (1.0 W cm-2, 5 min); the mice in group 4 (G4) are treated by GP-dAuNPs@Ce6+405-nm laser (1.0 W cm-2, 25 min)+ 660-nm laser (12 mW cm-2, 5 min); the mice in group 5 (G5) are treated by GP-dAuNPs@Ce6+405-nm laser (1.0 W cm-2, 25 min)+ 808-nm laser (1.0 W cm-2, 5 min); the mice in group 6 (G6) are treated by the GP-dAuNPs@Ce6+405-nm laser (1.0 W cm-2, 25 min)+ 660-nm laser (12 mW cm-2, 5 min)+ 808-nm laser (1.0 W cm-2, 5 min). Scale bars, 50 μm.
