# Supplementary material for: Pac-Man bacteria eat nanoprobes for aggregation-enhanced imaging and killing diverse microorganisms
Source: Research Square preprint supplement (doi:10.21203/rs.3.rs-272302/v1), 2021-04-09
Supplement: Supplementary file 4 [file 450347d341915bef4b662c0a.xlsx]

## Sheet: Sheet1
S 9
	LO2	Concentration(mg/mL)	Cell Viablity(%)				HEK-293T	Concentration(mg/mL)	Cell Viablity(%)					Marc-145	Concentration(mg/mL)	Cell Viablity(%)
		0	1	1	1			0	1	1	1				0	1	1	1
		2	0.806	0.879	0.903			2	1.00327	1.14094	1.01587				2	0.969585	0.970714	0.891073
		1	0.8407	0.835	0.931			1	1.07117	1.12752	0.981366				1	0.975964	1.05571	0.950801
		0.5	0.878	0.819	0.987			0.5	0.995092	1.0604	0.938723				0.5	0.939911	0.952857	0.870592
		0.25	0.9815	0.912	0.9028			0.25	1.03681	0.999605	0.878184				0.25	0.867953	0.942857	0.791615
		0.125	0.955	0.998	0.9128			0.125	0.991411	0.630083	0.877815				0.125	1.01706	0.883571	0.794081
	Hela	Concentration(mg/mL)	Cell Viablity(%)					Concentration(mg/mL)	Cell Viablity(%)
		0	1	1	1		MCF-7	0	1	1	1
		2	0.79198	0.87186	0.82449			2	0.879	1.089	0.8704
		1	0.8208	0.8967	0.937123			1	0.9085	0.9347	0.8856
		0.5	0.76944	0.83802	0.8729			0.5	0.92078	0.9795	0.9456
		0.25	0.96633	0.9809	0.861044			0.25	0.9299	1.123	0.985366
		0.125	0.971407	0.908365	0.866265			0.125	0.9385	0.9527	0.9737
