# Supplementary material for: Pac-Man bacteria eat nanoprobes for aggregation-enhanced imaging and killing diverse microorganisms
Source: Research Square preprint supplement (doi:10.21203/rs.3.rs-272302/v1), 2021-04-09
Supplement: Supplementary file 6 [file bd0c41f2e8783cc0406a49ef.xlsx]

## Sheet: Figure 6e
Figure 6e
	PBS	Bacteria CFU/mL(108)			AuNPs	Bacteria CFU/mL(108)			dAuNPs@Ce6	Bacteria CFU/mL(108)			GP-AuNPs@Ce6	Bacteria CFU/mL(108)			GP-dAuNPs@Ce6	Bacteria CFU/mL(108)
	G1	3.084	3.126	3.369	G1	2.805	2.798	2.564	G1	2.678	2.893	3.307	G1	1.228	1.527	1.439	G1	1.095	1.329	1.116
	G2	3.225	3.104	3.098	G2	2.967	2.996	2.852	G2	2.338	2.467	2.479	G2	3.153	3.096	2.989	G2	1.97	2.039	2.237
	G3	2.926	2.864	2.632	G3	2.645	2.369	2.582	G3	3.631	3.786	3.937	G3	1.511	1.679	1.832	G3	2.018	2.139	2.346
	G4	3.217	3.059	3.336	G4	3.063	2.889	3.125	G4	2.474	2.326	2.669	G4	1.532	1.679	1.986	G4	2.037	2.456	2.134
	G5	3.502	3.306	3.498	G5	3.39	3.126	3.029	G5	3.237	3.474	3.576	G5	2.091	2.327	2.167	G5	2.128	2.326	2.446
	G6	2.134	2.256	2.068	G6	2.192	2.327	2.013	G6	2.635	2.728	2.432	G6	1.796	1.832	1.996	G6	0.123	0.015	0.096

## Sheet: Figure 6f
Figure 6f
	PBS	Bacteria CFU/mL(108)			AuNPs	Bacteria CFU/mL(108)			dAuNPs@Ce6	Bacteria CFU/mL(108)			GP-AuNPs@Ce6	Bacteria CFU/mL(108)			GP-dAuNPs@Ce6	Bacteria CFU/mL(108)
	G1	3.266	3.478	2.987	G1	2.092	1.987	2.327	G1	3.335	3.042	3.279	G1	1.629	1.428	1.339	G1	1.864	1.632	1.579
	G2	2.715	2.428	2.669	G2	2.107	2.457	2.333	G2	2.532	2.498	2.689	G2	2.892	2.578	2.329	G2	2.148	2.347	2.405
	G3	2.606	2.873	2.501	G3	2.226	2.034	1.976	G3	2.458	2.578	2.632	G3	1.978	2.032	2.256	G3	1.618	1.862	1.548
	G4	4.522	4.027	3.986	G4	2.632	2.341	3.126	G4	3.862	4.251	4.039	G4	1.27	1.067	1.329	G4	1.526	1.636	1.329
	G5	2.927	2.432	2.867	G5	3.39	3.287	3.096	G5	2.573	2.869	2.579	G5	1.83	1.987	1.547	G5	1.732	1.457	1.229
	G6	3.838	3.659	3.333	G6	3.084	2.987	3.346	G6	3.861	3.579	3.696	G6	1.732	1.867	1.547	G6	0.031	0.059	0.176
