# Supplementary material for: Pac-Man bacteria eat nanoprobes for aggregation-enhanced imaging and killing diverse microorganisms
Source: Research Square preprint supplement (doi:10.21203/rs.3.rs-272302/v1), 2021-04-09
Supplement: Supplementary file 7 [file e0951681450b63bdbbebe149.xlsx]

## Sheet: Figure 4a
Figure 4a
			p/s/cm2/sr(108)					p/s/cm2/sr(108)
GP-dAuNPs@Ce6		PA	(-)	4.197	3.987	4.021		SA	(-)	4.401	4.341	4.236
			(+)	10.06	9.887	9.967			(+)	9.75	9.87	9.532

## Sheet: Figure 4b
Figure 4b
				p/s/cm2/sr(108)					p/s/cm2/sr(108)
GP-dAuNPs@Ce6		(-)	PBS	1.015	1.132	1.231		(+)	PBS	1.015	1.132	1.231
			PA+SA	3.906	3.669	3.793			PA+SA	9.906	9.932	9.75

## Sheet: Figure 4c
Figure 4c
			p/s/cm2/sr(108)					p/s/cm2/sr(108)
GP-dAuNPs@Ce6		(-)	PBS	1.387	1.485	1.186	(+)	PBS	1.387	1.485	1.186
			SA	3.062	3.277	3.015		SA	7.485	7.8	7.813

## Sheet: Sheet3
Figure 4d
			p/s/cm2/sr(108)					p/s/cm2/sr(108)
GP-dAuNPs@Ce6		(-)	PBS	1.432	1.231	1.578	(+)	PBS	1.432	1.231	1.578
			PA	2.798	2.998	2.876		PA	7.996	8.012	7.879

## Sheet: Figure 4e
Figure 4e
PA		(-)	PA Signals Intensity(a.u.)			(+)	PA Signals Intensity(a.u.)
		AuNPs	0.2147	0.3268	0.1864		0.3521	0.2928	0.3176
		dAuNPs@Ce6	0.3577	0.2204	0.1236		0.1896	0.2365	0.1987
		GP-AuNPs@Ce6	0.3698	0.1678	0.2183		0.2433	0.2524	0.3219
		GP-dAuNPs@Ce6	0.521	0.2237	0.2433		2.876	2.5967	3.0689
SA		(-)	PA Signals Intensity(a.u.)			(+)	PA Signals Intensity(a.u.)
		AuNPs	0.3577	0.3768	0.2204		0.3175	0.2204	0.1864
		dAuNPs@Ce6	0.2254	0.3165	0.2524		0.2117	0.2433	0.1987
		GP-AuNPs@Ce6	0.3986	0.3167	0.2689		0.3786	0.3194	0.2237
		GP-dAuNPs@Ce6	0.1864	0.253	0.2645		3.275	2.8969	3.1245
