# Supplementary material for: Pac-Man bacteria eat nanoprobes for aggregation-enhanced imaging and killing diverse microorganisms
Source: Research Square preprint supplement (doi:10.21203/rs.3.rs-272302/v1), 2021-04-09
Supplement: Supplementary file 9 [file f7d0a50bd1bfbec613e044f1.xlsx]

## Sheet: Figure S8a
S 8a
	（-）	SA	PA		（+）	SA	PA
		1.226	1.632			2.018	1.986
		1.296	1.529			2.327	1.732
		1.432	1.347			2.233	1.876

## Sheet: Figure S8b
S 8b
	(-)	SA	PA		(+)	SA	PA
		2.176	1.965			2.456	2.123
		2.497	1.893			2.047	2.426
		2.326	2.057			2.326	2.237
