# Supplementary material for: Pac-Man bacteria eat nanoprobes for aggregation-enhanced imaging and killing diverse microorganisms
Source: Research Square preprint supplement (doi:10.21203/rs.3.rs-272302/v1), 2021-04-09
Supplement: Supplementary file 11 [file 63b11d3905b8bf393ba3008d.xlsx]

## Sheet: Figure 7b
Figure 7b
	G1	Relative S/S0			G2	Relative S/S0			G3	Relative S/S0			G4	Relative S/S0			G5	Relative S/S0			G6	Relative S/S0
	Day-1	1	1	1	Day-1	1	1	1	Day-1	1	1	1	Day-1	1	1	1	Day-1	1	1	1	Day-1	1	1	1
	Day-3	1.38	1.27	1.19	Day-3	0.87	0.93	0.79	Day-3	1.46	1.328	1.207	Day-3	1.276	1.329	1.098	Day-3	0.873	0.767	0.789	Day-3	0.874	0.709	0.736
	Day-5	0.93	0.69	0.57	Day-5	0.76	0.66	0.603	Day-5	1.01	0.937	1.106	Day-5	0.876	0.939	0.776	Day-5	0.669	0.676	0.732	Day-5	0.695	0.727	0.605
	Day-7	0.76	0.69	0.57	Day-7	0.55	0.506	0.48	Day-7	0.837	0.927	0.779	Day-7	0.637	0.705	0.596	Day-7	0.598	0.607	0.567	Day-7	0.28	0.114	0.209
	Day-8	0.66	0.53	0.498	Day-8	0.476	0.507	0.43	Day-8	0.632	0.769	0.698	Day-8	0.532	0.498	0.476	Day-8	0.554	0.437	0.4	Day-8	0.0096	0	0.007

## Sheet: Figure 7c
Figure 7c
			CFU/mL(105)
		G1	1.327	1.506	1.237
		G2	1.839	1.736	1.906
		G3	1.217	1.328	1.413
		G4	1.596	1.428	1.627
		G5	0.827	0.798	1.003
		G6	0.0523	0.0657	0.079

## Sheet: Figure 7f
Figure 7f
	G1	Relative S/S0			G2	Relative S/S0			G3	Relative S/S0			G4	Relative S/S0			G5	Relative S/S0			G6	Relative S/S0
	Day-1	1	1	1	Day-1	1	1	1	Day-1	1	1	1	Day-1	1	1	1	Day-1	1	1	1	Day-1	1	1	1
	Day-2	0.926	0.937	0.987	Day-2	1.327	1.309	1.256	Day-2	1.208	1.332	1.297	Day-2	0.932	0.827	0.896	Day-2	0.832	0.809	0.897	Day-2	1.23	1.027	1.13
	Day-3	0.887	0.829	0.804	Day-3	0.963	1.117	1.01	Day-3	1.332	1.308	1.457	Day-3	0.976	0.899	0.903	Day-3	0.632	0.698	0.732	Day-3	0.837	0.769	0.932
	Day-4	0.769	0.732	0.807	Day-4	0.632	0.776	0.797	Day-4	1.508	1.432	1.597	Day-4	0.637	0.709	0.693	Day-4	0.507	0.476	0.432	Day-4	0.68	0.701	0.596
	Day-5	0.656	0.627	0.608	Day-5	0.596	0.709	0.632	Day-5	0.873	0.986	1.007	Day-5	0.827	0.756	0.703	Day-5	0.506	0.576	0.496	Day-5	0.106	0.237	0.155
	Day-7	0.683	0.657	0.609	Day-7	0.527	0.498	0.603	Day-7	0.832	0.797	0.867	Day-7	0.624	0.597	0.543	Day-7	0.428	0.397	0.507	Day-7	0.112	0.207	0.098
	Day-9	0.859	0.737	0.807	Day-9	0.496	0.589	0.532	Day-9	0.637	0.579	0.532	Day-9	0.467	0.501	0.432	Day-9	0.476	0.408	0.427	Day-9	0.056	0.037	0.062
	Day-11	0.501	0.432	0.532	Day-11	0.627	0.596	0.504	Day-11	0.729	0.632	0.596	Day-11	0.426	0.328	0.307	Day-11	0.398	0.457	0.509	Day-11	0	0	0

## Sheet: Figure 7g
Figure 7g
			CFU/mL(105)
		G1	3.235	3.527	3.128
		G2	4.023	4.169	3.869
		G3	3.829	3.598	3.617
		G4	3.589	3.164	3.339
		G5	1.441	1.827	1.696
		G6	0.089	0.123	0.063
