# Supplementary material for: Pac-Man bacteria eat nanoprobes for aggregation-enhanced imaging and killing diverse microorganisms
Source: Research Square preprint supplement (doi:10.21203/rs.3.rs-272302/v1), 2021-04-09
Supplement: Supplementary file 12 [file e0c05b6a94d7bac39db2bdb4.xlsx]

## Sheet: Figure 2c
Figure 2c
	Diameter (nm)	Number (%)		Diameter (nm)	Number %		Diameter (nm)	Number %		Diameter (nm)	Number %		Diameter (nm)	Number %		Diameter (nm)	Number %
AuNPs(0 min)	0.4	0	AuNPs(5 min)	0.4	0	AuNPs(10 min)	0.4	0	AuNPs(15 min)	0.4	0	AuNPs(20 min)	0.4	0	AuNPs(25 min)	0.4	0
	0.4632	0		0.4632	0		0.4632	0		0.4632	0		0.4632	0		0.4632	0
	0.5365	0		0.5365	0		0.5365	0		0.5365	0		0.5365	0		0.5365	0
	0.6213	0		0.6213	0		0.6213	0		0.6213	0		0.6213	0		0.6213	0
	0.7195	0		0.7195	0		0.7195	0		0.7195	0		0.7195	0		0.7195	0
	0.8332	0		0.8332	0		0.8332	0		0.8332	0		0.8332	0		0.8332	0
	0.9649	0		0.9649	0		0.9649	0		0.9649	0		0.9649	0		0.9649	0
	1.117	0		1.117	0		1.117	0		1.117	0		1.117	0		1.117	0
	1.294	0		1.294	0		1.294	0		1.294	0		1.294	0		1.294	0
	1.499	0		1.499	0		1.499	0		1.499	0		1.499	0		1.499	0
	1.736	0		1.736	0		1.736	0		1.736	0		1.736	0		1.736	0
	2.01	0		2.01	0		2.01	0		2.01	0		2.01	0		2.01	0
	2.328	0		2.328	0		2.328	0		2.328	0		2.328	0		2.328	0
	2.696	0		2.696	0		2.696	0		2.696	0		2.696	0		2.696	0
	3.122	0		3.122	0		3.122	0		3.122	0		3.122	0		3.122	0
	3.615	0		3.615	0		3.615	0		3.615	0		3.615	0		3.615	0
	4.187	0		4.187	0		4.187	0		4.187	0		4.187	0		4.187	0
	4.849	0		4.849	0		4.849	0		4.849	0		4.849	0		4.849	0
	5.615	0		5.615	0		5.615	0		5.615	0		5.615	0		5.615	0
	6.503	0		6.503	0		6.503	0		6.503	0		6.503	0		6.503	0
	7.531	0		7.531	0		7.531	0		7.531	0		7.531	0		7.531	0
	8.721	0		8.721	0		8.721	0		8.721	0		8.721	0		8.721	0
	10.1	21.7		10.1	0		10.1	0		10.1	0		10.1	0		10.1	0
	11.7	46.7		11.7	0		11.7	0		11.7	0		11.7	0		11.7	0
	13.54	28.3		13.54	0		13.54	0		13.54	0		13.54	0		13.54	0
	15.69	3.3		15.69	0		15.69	0		15.69	0		15.69	0		15.69	0
	18.17	0		18.17	0		18.17	0		18.17	0		18.17	0		18.17	0
	21.04	0		21.04	24.1		21.04	0		21.04	0		21.04	0		21.04	0
	24.36	0		24.36	49.1		24.36	0		24.36	0		24.36	0		24.36	0
	28.21	0		28.21	25.9		28.21	0		28.21	0		28.21	0		28.21	0
	32.67	0		32.67	0.9		32.67	0		32.67	0		32.67	0		32.67	0
	37.84	0		37.84	0		37.84	14.7		37.84	0		37.84	0		37.84	0
	43.82	0		43.82	0		43.82	39.7		43.82	0		43.82	0		43.82	0
	50.75	0		50.75	0		50.75	35.3		50.75	0		50.75	0		50.75	0
	58.77	0		58.77	0		58.77	10.3		58.77	15.5		58.77	0		58.77	0
	68.06	0		68.06	0		68.06	0		68.06	39		68.06	0		68.06	0
	78.82	0		78.82	0		78.82	0		78.82	33.1		78.82	0		78.82	0
	91.28	0		91.28	0		91.28	0		91.28	11		91.28	11.4		91.28	0
	105.7	0		105.7	0		105.7	0		105.7	1.4		105.7	34.7		105.7	0
	122.4	0		122.4	0		122.4	0		122.4	0		122.4	36.9		122.4	0
	141.8	0		141.8	0		141.8	0		141.8	0		141.8	15.1		141.8	66.2
	164.2	0		164.2	0		164.2	0		164.2	0		164.2	1.6		164.2	18.3
	190.1	0		190.1	0		190.1	0		190.1	0		190.1	0		190.1	5.7
	220.2	0		220.2	0		220.2	0		220.2	0		220.2	0		220.2	0.8
	255	0		255	0		255	0		255	0		255	0		255	0
	295.3	0		295.3	0		295.3	0		295.3	0		295.3	0		295.3	0
	342	0		342	0		342	0		342	0		342	0		342	0
	396.1	0		396.1	0		396.1	0		396.1	0		396.1	0		396.1	0
	458.7	0		458.7	0		458.7	0		458.7	0		458.7	0		458.7	0
	531.2	0		531.2	0		531.2	0		531.2	0		531.2	0		531.2	0
	615.1	0		615.1	0		615.1	0		615.1	0		615.1	0		615.1	0
	712.4	0		712.4	0		712.4	0		712.4	0		712.4	0		712.4	0
	825	0		825	0		825	0		825	0		825	0		825	0
	955.4	0		955.4	0		955.4	0		955.4	0		955.4	0		955.4	0
	1106	0		1106	0		1106	0		1106	0		1106	0		1106	0
	1281	0		1281	0		1281	0		1281	0		1281	0.1		1281	0
	1484	0		1484	0		1484	0		1484	0		1484	0.1		1484	0
	1718	0		1718	0		1718	0		1718	0		1718	0.1		1718	0
	1990	0		1990	0		1990	0		1990	0		1990	0		1990	0
	2305	0		2305	0		2305	0		2305	0		2305	0		2305	0
	2669	0		2669	0		2669	0		2669	0		2669	0		2669	0
	3091	0		3091	0		3091	0		3091	0		3091	0		3091	0
	3580	0		3580	0		3580	0		3580	0		3580	0		3580	0
	4145	0		4145	0		4145	0		4145	0		4145	0		4145	0
	4801	0		4801	0		4801	0		4801	0		4801	0		4801	0
	5560	0		5560	0		5560	0		5560	0		5560	0		5560	0
	6439	0		6439	0		6439	0		6439	0		6439	0		6439	0
	7456	0		7456	0		7456	0		7456	0		7456	0		7456	0
	8635	0		8635	0		8635	0		8635	0		8635	0		8635	0
	10000	0		10000	0		10000	0		10000	0		10000	0		10000	0

## Sheet: Figure 2d
Figure 2d
	Wavelength (nm)	Absorbance		Wavelength (nm)	Absorbance		Wavelength (nm)	Absorbance		Wavelength (nm)	Absorbance		Wavelength (nm)	Absorbance		Wavelength (nm)	Absorbance
0 min	400	1.3817	5 min	400	0.9337	10 min	400	0.7855	15 min	400	0.3257	20 min	400	0.6702	25 min	400	0.6288
	402	1.3636		402	0.9334		402	0.7802		402	0.3206		402	0.6655		402	0.626
	404	1.3461		404	0.9286		404	0.775		404	0.3155		404	0.6609		404	0.6233
	406	1.3291		406	0.92		406	0.7715		406	0.3121		406	0.6565		406	0.6206
	408	1.3128		408	0.9113		408	0.7715		408	0.3111		408	0.6522		408	0.6181
	410	1.2971		410	0.9015		410	0.7669		410	0.3097		410	0.6481		410	0.6155
	412	1.282		412	0.8931		412	0.7684		412	0.3106		412	0.6441		412	0.6131
	414	1.2675		414	0.882		414	0.7657		414	0.3076		414	0.6402		414	0.6107
	416	1.2536		416	0.8737		416	0.7652		416	0.3081		416	0.6365		416	0.6084
	418	1.2403		418	0.8686		418	0.7664		418	0.3085		418	0.633		418	0.6062
	420	1.2276		420	0.864		420	0.767		420	0.311		420	0.6296		420	0.6041
	422	1.2155		422	0.8617		422	0.7715		422	0.3163		422	0.6263		422	0.602
	424	1.204		424	0.861		424	0.7752		424	0.32		424	0.6232		424	0.6
	426	1.1931		426	0.8604		426	0.7782		426	0.322		426	0.6202		426	0.598
	428	1.1828		428	0.8591		428	0.78		428	0.3253		428	0.6173		428	0.5962
	430	1.1731		430	0.8628		430	0.7827		430	0.3273		430	0.6146		430	0.5944
	432	1.164		432	0.8603		432	0.782		432	0.3261		432	0.6121		432	0.5927
	434	1.1555		434	0.8592		434	0.7813		434	0.3259		434	0.6097		434	0.591
	436	1.1476		436	0.8591		436	0.782		436	0.327		436	0.6074		436	0.5894
	438	1.1404		438	0.8565		438	0.7807		438	0.3246		438	0.6053		438	0.5879
	440	1.1337		440	0.8563		440	0.7807		440	0.3239		440	0.6033		440	0.5865
	442	1.1276		442	0.8562		442	0.7812		442	0.3237		442	0.6015		442	0.5851
	444	1.1221		444	0.8568		444	0.7809		444	0.3223		444	0.5998		444	0.5838
	446	1.1172		446	0.8558		446	0.7813		446	0.321		446	0.5983		446	0.5826
	448	1.113		448	0.857		448	0.7813		448	0.3207		448	0.5969		448	0.5815
	450	1.1093		450	0.8573		450	0.7815		450	0.3202		450	0.5957		450	0.5804
	452	1.1055		452	0.8586		452	0.7805		452	0.3193		452	0.5937		452	0.5787
	454	1.1019		454	0.8592		454	0.7831		454	0.3184		454	0.5921		454	0.5774
	456	1.0996		456	0.8603		456	0.7825		456	0.3168		456	0.5915		456	0.5769
	458	1.0976		458	0.8632		458	0.7827		458	0.3164		458	0.5907		458	0.5756
	460	1.0955		460	0.8644		460	0.785		460	0.3167		460	0.5893		460	0.5745
	462	1.095		462	0.8675		462	0.7868		462	0.3173		462	0.589		462	0.5748
	464	1.0954		464	0.8714		464	0.7885		464	0.3154		464	0.5883		464	0.5745
	466	1.0967		466	0.8764		466	0.7903		466	0.3161		466	0.5871		466	0.5737
	468	1.0987		468	0.8789		468	0.7945		468	0.3182		468	0.5872		468	0.5737
	470	1.1013		470	0.8839		470	0.7959		470	0.3173		470	0.5879		470	0.5732
	472	1.1045		472	0.892		472	0.8017		472	0.3174		472	0.5878		472	0.5734
	474	1.1091		474	0.8966		474	0.8061		474	0.3194		474	0.5884		474	0.5727
	476	1.115		476	0.9047		476	0.8122		476	0.3204		476	0.5893		476	0.5732
	478	1.1219		478	0.9087		478	0.8139		478	0.3208		478	0.591		478	0.5731
	480	1.1287		480	0.9173		480	0.819		480	0.3225		480	0.5926		480	0.573
	482	1.1371		482	0.9283		482	0.8248		482	0.3249		482	0.5953		482	0.5729
	484	1.1461		484	0.9316		484	0.8298		484	0.3275		484	0.5972		484	0.5737
	486	1.1561		486	0.9436		486	0.8374		486	0.329		486	0.5996		486	0.574
	488	1.1666		488	0.9514		488	0.8448		488	0.3325		488	0.6025		488	0.5749
	490	1.1788		490	0.9621		490	0.8517		490	0.3345		490	0.6054		490	0.5769
	492	1.1907		492	0.9679		492	0.8594		492	0.3391		492	0.6088		492	0.5781
	494	1.2033		494	0.9812		494	0.8696		494	0.341		494	0.6123		494	0.5792
	496	1.2167		496	0.9918		496	0.8743		496	0.3472		496	0.6161		496	0.5812
	498	1.2305		498	0.9985		498	0.884		498	0.349		498	0.6201		498	0.5828
	500	1.2438		500	1.0087		500	0.8921		500	0.3531		500	0.6244		500	0.5852
	502	1.2576		502	1.0206		502	0.903		502	0.3594		502	0.6294		502	0.5875
	504	1.2713		504	1.0298		504	0.9059		504	0.3657		504	0.6343		504	0.5904
	506	1.2849		506	1.036		506	0.9155		506	0.3691		506	0.6381		506	0.5927
	508	1.2972		508	1.0387		508	0.9185		508	0.3738		508	0.6429		508	0.5951
	510	1.3102		510	1.0458		510	0.9246		510	0.3795		510	0.6485		510	0.598
	512	1.3231		512	1.0498		512	0.9301		512	0.3819		512	0.6536		512	0.5999
	514	1.3341		514	1.0542		514	0.9374		514	0.3878		514	0.6587		514	0.6018
	516	1.3456		516	1.0564		516	0.9362		516	0.3933		516	0.6642		516	0.6048
	518	1.3555		518	1.0557		518	0.9382		518	0.3964		518	0.669		518	0.6076
	520	1.364		520	1.0562		520	0.9428		520	0.3995		520	0.6743		520	0.6096
	522	1.3723		522	1.0547		522	0.9414		522	0.4047		522	0.6786		522	0.6109
	524	1.3793		524	1.0529		524	0.9416		524	0.4107		524	0.6841		524	0.6139
	526	1.3836		526	1.05		526	0.9397		526	0.4122		526	0.6897		526	0.6157
	528	1.3868		528	1.0431		528	0.9339		528	0.4157		528	0.6934		528	0.6182
	530	1.3883		530	1.0347		530	0.9444		530	0.4192		530	0.6976		530	0.6202
	532	1.3893		532	1.029		532	0.9362		532	0.4205		532	0.7029		532	0.6227
	534	1.388		534	1.0221		534	0.933		534	0.4228		534	0.7069		534	0.6247
	536	1.384		536	1.0125		536	0.9295		536	0.4275		536	0.7109		536	0.6265
	538	1.38		538	1.0009		538	0.9293		538	0.4275		538	0.7148		538	0.6287
	540	1.3742		540	0.9903		540	0.9199		540	0.4303		540	0.7179		540	0.6311
	542	1.3659		542	0.9729		542	0.9182		542	0.4307		542	0.7202		542	0.6327
	544	1.3557		544	0.9615		544	0.9151		544	0.4333		544	0.7229		544	0.6336
	546	1.3454		546	0.9435		546	0.9071		546	0.4335		546	0.7257		546	0.6356
	548	1.3333		548	0.9259		548	0.907		548	0.437		548	0.7286		548	0.6371
	550	1.3192		550	0.908		550	0.9001		550	0.4387		550	0.7305		550	0.6389
	552	1.3054		552	0.8858		552	0.8926		552	0.4386		552	0.7321		552	0.6402
	554	1.29		554	0.8659		554	0.8892		554	0.4394		554	0.7336		554	0.6414
	556	1.2727		556	0.847		556	0.8855		556	0.4401		556	0.7343		556	0.6423
	558	1.2532		558	0.8265		558	0.8775		558	0.4428		558	0.7358		558	0.6435
	560	1.2344		560	0.8005		560	0.871		560	0.4412		560	0.7368		560	0.6458
	562	1.214		562	0.7783		562	0.8636		562	0.4425		562	0.7377		562	0.6472
	564	1.1934		564	0.7534		564	0.8575		564	0.4417		564	0.7378		564	0.6476
	566	1.1728		566	0.733		566	0.8538		566	0.4444		566	0.7378		566	0.649
	568	1.1511		568	0.7086		568	0.8507		568	0.4439		568	0.7391		568	0.6512
	570	1.1284		570	0.6899		570	0.8407		570	0.4481		570	0.7381		570	0.6518
	572	1.1055		572	0.666		572	0.8365		572	0.4463		572	0.7382		572	0.6517
	574	1.0831		574	0.646		574	0.8321		574	0.4454		574	0.739		574	0.6527
	576	1.0604		576	0.6282		576	0.8315		576	0.4443		576	0.7387		576	0.6532
	578	1.0364		578	0.6102		578	0.8261		578	0.4462		578	0.7381		578	0.6532
	580	1.0128		580	0.5865		580	0.8183		580	0.4443		580	0.738		580	0.6536
	582	0.9911		582	0.5673		582	0.8179		582	0.4448		582	0.7384		582	0.6543
	584	0.9683		584	0.5512		584	0.8078		584	0.4445		584	0.7373		584	0.6549
	586	0.9457		586	0.5338		586	0.8012		586	0.4414		586	0.7365		586	0.6551
	588	0.9242		588	0.5171		588	0.7967		588	0.4404		588	0.7359		588	0.6562
	590	0.904		590	0.4984		590	0.7922		590	0.4413		590	0.7355		590	0.6563
	592	0.881		592	0.487		592	0.7891		592	0.4386		592	0.7345		592	0.6564
	594	0.8597		594	0.4688		594	0.7755		594	0.4331		594	0.7333		594	0.6572
	596	0.84		596	0.4502		596	0.7694		596	0.4322		596	0.7338		596	0.6588
	598	0.8204		598	0.4393		598	0.7713		598	0.4297		598	0.7326		598	0.6598
	600	0.8008		600	0.424		600	0.7588		600	0.4273		600	0.7321		600	0.6593
	602	0.7827		602	0.4112		602	0.7531		602	0.4229		602	0.7322		602	0.6584
	604	0.7648		604	0.3958		604	0.7422		604	0.4151		604	0.7316		604	0.6588
	606	0.7474		606	0.3833		606	0.7373		606	0.4146		606	0.7304		606	0.6571
	608	0.7307		608	0.3721		608	0.729		608	0.4093		608	0.7306		608	0.6555
	610	0.7156		610	0.3588		610	0.7179		610	0.4037		610	0.7307		610	0.6552
	612	0.7		612	0.3507		612	0.7106		612	0.3981		612	0.7297		612	0.6552
	614	0.6833		614	0.3384		614	0.7		614	0.391		614	0.7288		614	0.6539
	616	0.6699		616	0.3251		616	0.686		616	0.3801		616	0.7278		616	0.6536
	618	0.6548		618	0.3166		618	0.6785		618	0.3795		618	0.7275		618	0.6531
	620	0.6409		620	0.3071		620	0.66		620	0.3716		620	0.7265		620	0.6518
	622	0.6281		622	0.2955		622	0.6499		622	0.3642		622	0.7254		622	0.6517
	624	0.6145		624	0.2872		624	0.6349		624	0.3554		624	0.7256		624	0.6524
	626	0.6009		626	0.2795		626	0.6217		626	0.3457		626	0.7244		626	0.6516
	628	0.5884		628	0.2687		628	0.6052		628	0.3373		628	0.7224		628	0.6524
	630	0.576		630	0.2607		630	0.5911		630	0.3298		630	0.722		630	0.6514
	632	0.5649		632	0.2547		632	0.5758		632	0.3198		632	0.7204		632	0.6512
	634	0.5526		634	0.2488		634	0.5602		634	0.3131		634	0.7178		634	0.6503
	636	0.5397		636	0.2409		636	0.5448		636	0.3063		636	0.7155		636	0.6502
	638	0.5295		638	0.2299		638	0.5254		638	0.2944		638	0.713		638	0.6501
	640	0.5176		640	0.229		640	0.5113		640	0.2892		640	0.7103		640	0.6495
	642	0.5076		642	0.2221		642	0.4945		642	0.2776		642	0.7081		642	0.6479
	644	0.4972		644	0.2186		644	0.4793		644	0.2717		644	0.705		644	0.6458
	646	0.4891		646	0.215		646	0.4627		646	0.2636		646	0.7025		646	0.6448
	648	0.4786		648	0.2095		648	0.4467		648	0.2552		648	0.6993		648	0.6443
	650	0.4693		650	0.2054		650	0.4314		650	0.2493		650	0.6962		650	0.6431
	652	0.4592		652	0.2025		652	0.415		652	0.2402		652	0.693		652	0.6418
	654	0.4498		654	0.1989		654	0.3967		654	0.2326		654	0.6886		654	0.6416
	656	0.4398		656	0.1923		656	0.3892		656	0.2296		656	0.6862		656	0.6411
	658	0.4319		658	0.1879		658	0.3749		658	0.222		658	0.6843		658	0.6408
	660	0.4239		660	0.1814		660	0.3597		660	0.2171		660	0.6793		660	0.6392
	662	0.4153		662	0.1729		662	0.3465		662	0.208		662	0.675		662	0.6382
	664	0.4086		664	0.169		664	0.3378		664	0.207		664	0.672		664	0.6375
	666	0.3989		666	0.1596		666	0.3245		666	0.1989		666	0.6686		666	0.6364
	668	0.3901		668	0.1533		668	0.3126		668	0.1913		668	0.664		668	0.6341
	670	0.3821		670	0.1485		670	0.304		670	0.1886		670	0.6586		670	0.633
	672	0.3744		672	0.1413		672	0.2898		672	0.1809		672	0.6558		672	0.6322
	674	0.3656		674	0.1386		674	0.2791		674	0.1755		674	0.6517		674	0.6305
	676	0.3577		676	0.135		676	0.2722		676	0.1734		676	0.6475		676	0.6279
	678	0.3505		678	0.1325		678	0.2662		678	0.1684		678	0.6452		678	0.6272
	680	0.3458		680	0.1274		680	0.2526		680	0.1634		680	0.6413		680	0.626
	682	0.3393		682	0.1247		682	0.2422		682	0.158		682	0.6374		682	0.6234
	684	0.3329		684	0.1183		684	0.2337		684	0.151		684	0.6312		684	0.6214
	686	0.3272		686	0.1209		686	0.2265		686	0.1504		686	0.6265		686	0.6206
	688	0.3219		688	0.1178		688	0.2208		688	0.1484		688	0.6233		688	0.6202
	690	0.3153		690	0.1083		690	0.2159		690	0.1394		690	0.617		690	0.6179
	692	0.3072		692	0.1073		692	0.2021		692	0.1372		692	0.6107		692	0.6159
	694	0.3029		694	0.1084		694	0.2022		694	0.1373		694	0.6064		694	0.6139
	696	0.3004		696	0.1038		696	0.1948		696	0.1315		696	0.6025		696	0.6121
	698	0.2965		698	0.1018		698	0.1895		698	0.1255		698	0.5966		698	0.6077
	700	0.2927		700	0.1004		700	0.1854		700	0.1208		700	0.5921		700	0.6032
	702	0.2896		702	0.1033		702	0.1817		702	0.1264		702	0.5859		702	0.6012
	704	0.2857		704	0.1007		704	0.1776		704	0.1201		704	0.5807		704	0.5992
	706	0.2816		706	0.093		706	0.1671		706	0.1143		706	0.575		706	0.5962
	708	0.2782		708	0.0952		708	0.1694		708	0.1087		708	0.5704		708	0.5939
	710	0.2753		710	0.0929		710	0.1591		710	0.1144		710	0.5646		710	0.592
	712	0.2736		712	0.0895		712	0.1579		712	0.1101		712	0.558		712	0.5891
	714	0.2709		714	0.0856		714	0.1536		714	0.1063		714	0.5528		714	0.5852
	716	0.2697		716	0.0916		716	0.1534		716	0.1014		716	0.547		716	0.5832
	718	0.2674		718	0.0883		718	0.1501		718	0.1037		718	0.543		718	0.5803
	720	0.2656		720	0.0823		720	0.1397		720	0.0987		720	0.5374		720	0.5777
	722	0.262		722	0.0839		722	0.1418		722	0.0966		722	0.5323		722	0.5737
	724	0.2596		724	0.0836		724	0.1442		724	0.0869		724	0.5267		724	0.571
	726	0.2573		726	0.0824		726	0.1336		726	0.0941		726	0.5209		726	0.5681
	728	0.2554		728	0.0802		728	0.1336		728	0.0915		728	0.5145		728	0.5657
	730	0.2534		730	0.0761		730	0.1268		730	0.0827		730	0.5086		730	0.5625
	732	0.2513		732	0.0753		732	0.1279		732	0.0785		732	0.502		732	0.5602
	734	0.2479		734	0.0747		734	0.1269		734	0.084		734	0.4965		734	0.5578
	736	0.2452		736	0.0769		736	0.123		736	0.0847		736	0.4926		736	0.5539
	738	0.2432		738	0.0676		738	0.1156		738	0.0768		738	0.488		738	0.5508
	740	0.2403		740	0.0682		740	0.1133		740	0.0813		740	0.4822		740	0.5469
	742	0.2393		742	0.0701		742	0.1147		742	0.0802		742	0.4766		742	0.5422
	744	0.2363		744	0.0665		744	0.1073		744	0.0772		744	0.47		744	0.5399
	746	0.2344		746	0.0658		746	0.1054		746	0.071		746	0.4666		746	0.5384
	748	0.2301		748	0.0662		748	0.1056		748	0.0691		748	0.4608		748	0.537
	750	0.2261		750	0.0637		750	0.103		750	0.0694		750	0.455		750	0.5332
	752	0.2233		752	0.0643		752	0.1065		752	0.0694		752	0.4506		752	0.5303
	754	0.2232		754	0.0638		754	0.0992		754	0.0689		754	0.4462		754	0.5285
	756	0.2213		756	0.0639		756	0.1012		756	0.0667		756	0.4408		756	0.5245
	758	0.2195		758	0.0622		758	0.0958		758	0.0628		758	0.4345		758	0.522
	760	0.2154		760	0.0623		760	0.0947		760	0.0586		760	0.4274		760	0.5191
	762	0.2127		762	0.0571		762	0.0975		762	0.0613		762	0.423		762	0.5164
	764	0.2094		764	0.0621		764	0.0933		764	0.0611		764	0.4191		764	0.5145
	766	0.2045		766	0.0567		766	0.0908		766	0.0575		766	0.4145		766	0.5104
	768	0.2025		768	0.0551		768	0.0925		768	0.0583		768	0.4093		768	0.5076
	770	0.1993		770	0.0556		770	0.0898		770	0.0572		770	0.4052		770	0.5065
	772	0.1955		772	0.0548		772	0.0887		772	0.0545		772	0.402		772	0.5033
	774	0.1926		774	0.0519		774	0.0859		774	0.0529		774	0.3972		774	0.4994
	776	0.1915		776	0.0571		776	0.0897		776	0.0536		776	0.393		776	0.4979
	778	0.1898		778	0.0522		778	0.0865		778	0.0537		778	0.3885		778	0.4954
	780	0.1876		780	0.0519		780	0.0865		780	0.0534		780	0.3823		780	0.4927
	782	0.1841		782	0.0513		782	0.0877		782	0.05		782	0.3779		782	0.4908
	784	0.182		784	0.0506		784	0.081		784	0.0475		784	0.3722		784	0.4885
	786	0.1784		786	0.0483		786	0.0806		786	0.048		786	0.3685		786	0.4859
	788	0.1757		788	0.0499		788	0.082		788	0.0485		788	0.3658		788	0.4821
	790	0.1728		790	0.0529		790	0.0777		790	0.0462		790	0.3598		790	0.4769
	792	0.1718		792	0.0457		792	0.0759		792	0.0453		792	0.3569		792	0.4739
	794	0.1709		794	0.0514		794	0.0753		794	0.0422		794	0.353		794	0.471
	796	0.1718		796	0.0455		796	0.0753		796	0.0404		796	0.3496		796	0.4682
	798	0.1685		798	0.0492		798	0.076		798	0.0438		798	0.3461		798	0.4635
	800	0.1657		800	0.0486		800	0.0767		800	0.0432		800	0.3432		800	0.4607
	802	0.1642		802	0.0525		802	0.0794		802	0.0457		802	0.3392		802	0.4594
	804	0.1616		804	0.0463		804	0.0707		804	0.0436		804	0.3351		804	0.4577
	806	0.1616		806	0.0501		806	0.0752		806	0.0451		806	0.3313		806	0.4542
	808	0.1619		808	0.0476		808	0.0714		808	0.0415		808	0.3299		808	0.4499
	810	0.1617		810	0.0443		810	0.0732		810	0.0388		810	0.3263		810	0.4472
	812	0.16		812	0.0455		812	0.0669		812	0.0369		812	0.3222		812	0.4447
	814	0.1576		814	0.0456		814	0.0667		814	0.0388		814	0.3206		814	0.4422
	816	0.1558		816	0.0454		816	0.0671		816	0.0405		816	0.3177		816	0.441
	818	0.1533		818	0.0462		818	0.0668		818	0.0377		818	0.3167		818	0.4384
	820	0.1507		820	0.0482		820	0.0647		820	0.0357		820	0.314		820	0.4355
	822	0.1479		822	0.0454		822	0.0627		822	0.0358		822	0.311		822	0.4335
	824	0.1475		824	0.0497		824	0.0569		824	0.0373		824	0.3086		824	0.4325
	826	0.1469		826	0.0447		826	0.0549		826	0.0374		826	0.306		826	0.4317
	828	0.1462		828	0.0532		828	0.0603		828	0.0361		828	0.303		828	0.4304
	830	0.1455		830	0.0428		830	0.0515		830	0.0349		830	0.3003		830	0.4286
	832	0.1445		832	0.0426		832	0.0567		832	0.0344		832	0.2973		832	0.4259
	834	0.1436		834	0.0486		834	0.0616		834	0.0344		834	0.2956		834	0.4241
	836	0.1423		836	0.0416		836	0.0513		836	0.0354		836	0.2929		836	0.4213
	838	0.1409		838	0.0417		838	0.0582		838	0.0346		838	0.2888		838	0.421
	840	0.1405		840	0.0352		840	0.056		840	0.0282		840	0.286		840	0.4189
	842	0.141		842	0.0415		842	0.0549		842	0.0357		842	0.2834		842	0.4177
	844	0.1394		844	0.0411		844	0.0576		844	0.0329		844	0.2809		844	0.4159
	846	0.1383		846	0.0371		846	0.0592		846	0.0328		846	0.278		846	0.4137
	848	0.1373		848	0.032		848	0.0523		848	0.0278		848	0.2739		848	0.4118
	850	0.1366		850	0.0355		850	0.0556		850	0.0284		850	0.2705		850	0.4099
	852	0.1364		852	0.0306		852	0.0546		852	0.0263		852	0.268		852	0.4078
	854	0.1364		854	0.0381		854	0.0533		854	0.0304		854	0.2635		854	0.4061
	856	0.1349		856	0.0363		856	0.0514		856	0.0283		856	0.2593		856	0.4042
	858	0.1335		858	0.0308		858	0.0539		858	0.0262		858	0.2579		858	0.403
	860	0.1316		860	0.0326		860	0.0537		860	0.0292		860	0.2553		860	0.4
	862	0.1317		862	0.0373		862	0.0542		862	0.0281		862	0.2543		862	0.3983
	864	0.1285		864	0.0366		864	0.0545		864	0.0248		864	0.2521		864	0.3969
	866	0.128		866	0.0353		866	0.0526		866	0.0243		866	0.2494		866	0.3934
	868	0.1282		868	0.0326		868	0.0465		868	0.0224		868	0.2462		868	0.393
	870	0.1276		870	0.0339		870	0.0486		870	0.0215		870	0.2436		870	0.3919
	872	0.1275		872	0.0402		872	0.0531		872	0.0282		872	0.2424		872	0.3894
	874	0.1277		874	0.0398		874	0.0477		874	0.0234		874	0.2394		874	0.3875
	876	0.1261		876	0.0378		876	0.0492		876	0.0233		876	0.2375		876	0.3857
	878	0.1256		878	0.041		878	0.0478		878	0.0201		878	0.2355		878	0.3825
	880	0.1244		880	0.0405		880	0.0448		880	0.0213		880	0.2343		880	0.3806
	882	0.1235		882	0.0468		882	0.0448		882	0.0238		882	0.2338		882	0.3776
	884	0.1245		884	0.0381		884	0.0365		884	0.0261		884	0.2322		884	0.3738
	886	0.1243		886	0.0383		886	0.044		886	0.0226		886	0.2309		886	0.3719
	888	0.1249		888	0.0356		888	0.0405		888	0.0218		888	0.2302		888	0.3692
	890	0.125		890	0.0362		890	0.0423		890	0.0209		890	0.2279		890	0.368
	892	0.125		892	0.0351		892	0.0441		892	0.0233		892	0.228		892	0.3666
	894	0.1241		894	0.0387		894	0.0451		894	0.0207		894	0.2269		894	0.3646
	896	0.124		896	0.038		896	0.0389		896	0.0222		896	0.2271		896	0.363
	898	0.1203		898	0.0349		898	0.0379		898	0.0202		898	0.2262		898	0.3602
	900	0.1204		900	0.0335		900	0.0413		900	0.0235		900	0.2243		900	0.3598
	902	0.1202		902	0.0361		902	0.0426		902	0.0244		902	0.2222		902	0.3586
	904	0.1187		904	0.0441		904	0.0436		904	0.0217		904	0.2217		904	0.3567
	906	0.1184		906	0.0334		906	0.0325		906	0.0223		906	0.2223		906	0.3539
	908	0.1161		908	0.0343		908	0.0399		908	0.0188		908	0.2214		908	0.3519
	910	0.1131		910	0.0345		910	0.0387		910	0.0171		910	0.2193		910	0.3514
	912	0.1098		912	0.0354		912	0.0388		912	0.0196		912	0.2183		912	0.349
	914	0.1083		914	0.0361		914	0.041		914	0.0199		914	0.219		914	0.348
	916	0.1058		916	0.0446		916	0.0414		916	0.0185		916	0.2174		916	0.3471
	918	0.103		918	0.033		918	0.0298		918	0.0202		918	0.2168		918	0.345
	920	0.1009		920	0.0326		920	0.0354		920	0.0174		920	0.2149		920	0.3437
	922	0.0985		922	0.0312		922	0.0348		922	0.0174		922	0.2134		922	0.343
	924	0.0963		924	0.031		924	0.0394		924	0.019		924	0.2117		924	0.3411
	926	0.0936		926	0.0351		926	0.0402		926	0.0198		926	0.2102		926	0.3405
	928	0.0903		928	0.0317		928	0.0416		928	0.0167		928	0.2091		928	0.3389
	930	0.0865		930	0.0315		930	0.0385		930	0.0181		930	0.2078		930	0.3369
	932	0.0822		932	0.032		932	0.0354		932	0.0151		932	0.2067		932	0.3357
	934	0.0776		934	0.0342		934	0.036		934	0.0189		934	0.2067		934	0.3341
	936	0.0724		936	0.0302		936	0.0355		936	0.0123		936	0.2062		936	0.3324
	938	0.0684		938	0.0367		938	0.0364		938	0.0187		938	0.2057		938	0.3315
	940	0.0647		940	0.0323		940	0.0339		940	0.0181		940	0.2053		940	0.3287
	942	0.0611		942	0.0311		942	0.0322		942	0.0169		942	0.2033		942	0.3264
	944	0.056		944	0.0305		944	0.0348		944	0.0155		944	0.202		944	0.3245
	946	0.0521		946	0.0307		946	0.0319		946	0.0178		946	0.1994		946	0.3236
	948	0.0479		948	0.0312		948	0.0352		948	0.0156		948	0.1993		948	0.3219
	950	0.0421		950	0.0318		950	0.033		950	0.0158		950	0.1982		950	0.3198
	952	0.0392		952	0.0315		952	0.0295		952	0.0169		952	0.1965		952	0.3178
	954	0.0364		954	0.028		954	0.0293		954	0.0164		954	0.1947		954	0.3158
	956	0.0337		956	0.03		956	0.0334		956	0.016		956	0.1929		956	0.3137
	958	0.0311		958	0.0298		958	0.0328		958	0.0142		958	0.191		958	0.3117
	960	0.0286		960	0.0294		960	0.0339		960	0.017		960	0.1891		960	0.3095
	962	0.0262		962	0.027		962	0.0288		962	0.0146		962	0.1871		962	0.3074
	964	0.0239		964	0.029		964	0.0321		964	0.0158		964	0.185		964	0.3051
	966	0.0217		966	0.027		966	0.0287		966	0.0108		966	0.1829		966	0.3029
	968	0.0196		968	0.0293		968	0.03		968	0.0139		968	0.1807		968	0.3006
	970	0.0176		970	0.0281		970	0.0286		970	0.0152		970	0.1785		970	0.2983
	972	0.0156		972	0.0288		972	0.0269		972	0.0134		972	0.1762		972	0.2959
	974	0.0138		974	0.0293		974	0.027		974	0.0135		974	0.1738		974	0.2935
	976	0.0121		976	0.0284		976	0.0273		976	0.0135		976	0.1714		976	0.2911
	978	0.0105		978	0.0287		978	0.0273		978	0.011		978	0.1689		978	0.2886
	980	0.00895		980	0.037		980	0.0261		980	0.0126		980	0.1664		980	0.2861
	982	0.00753		982	0.0257		982	0.0211		982	0.0142		982	0.1638		982	0.2836
	984	0.0062		984	0.0265		984	0.025		984	0.0118		984	0.1612		984	0.281
	986	0.00496		986	0.0241		986	0.0242		986	0.0105		986	0.1585		986	0.2783
	988	0.00383		988	0.0247		988	0.024		988	0.0105		988	0.1557		988	0.2757
	990	0.0028		990	0.0278		990	0.0257		990	0.0111		990	0.1529		990	0.273
	992	0.00186		992	0.0398		992	0.0278		992	0.0102		992	0.15		992	0.2702
	994	0.00102		994	0.0254		994	0.0188		994	0.0127		994	0.1471		994	0.2674
	996	0.000278		996	0.025		996	0.0204		996	0.0096		996	0.1441		996	0.2646
	998	-0.000365		998	0.0227		998	0.0223		998	0.0077		998	0.1411		998	0.2617
	1000	-0.000911		1000	0.0247		1000	0.0257		1000	0.0097		1000	0.138		1000	0.2588

## Sheet: Figure 2e
Figure 2e
	Wavelength (nm)	Intensity		Wavelength (nm)	Intensity
GP-dAuNPs@Ce6(-)	600	15480	GP-dAuNPs@Ce6(+)	600	55190
	601	16670		601	57470
	602	15960		602	60040
	603	17200		603	60650
	604	18000		604	64740
	605	18050		605	69500
	606	18930		606	69800
	607	20630		607	75200
	608	21230		608	76340
	609	21860		609	81520
	610	24260		610	86900
	611	24910		611	92020
	612	25540		612	96770
	613	27830		613	103270
	614	28470		614	107760
	615	30500		615	114400
	616	32670		616	119780
	617	32240		617	126080
	618	35740		618	136530
	619	36640		619	144440
	620	39710		620	152510
	621	40650		621	166050
	622	43720		622	181140
	623	47880		623	194030
	624	52850		624	210720
	625	57110		625	230520
	626	65630		626	257110
	627	70990		627	286700
	628	81510		628	323650
	629	91690		629	368130
	630	107140		630	424000
	631	123020		631	489380
	632	143560		632	559880
	633	170580		633	663840
	634	200200		634	774300
	635	241250		635	901040
	636	283090		636	1075740
	637	341370		637	1278290
	638	407180		638	1501780
	639	476930		639	1740420
	640	572400		640	2067050
	641	670370		641	2369910
	642	794160		642	2736700
	643	946870		643	3201070
	644	1100890		644	3623800
	645	1265070		645	4092510
	646	1460630		646	4573390
	647	1691490		647	5169070
	648	1919350		648	5712290
	649	2149480		649	6263440
	650	2424290		650	6880470
	651	2660230		651	7425460
	652	2896050		652	7957540
	653	3111460		653	8490970
	654	3328670		654	9063920
	655	3515150		655	9577380
	656	3674570		656	10031400
	657	3786370		657	10478400
	658	3862050		658	10826500
	659	3869790		659	11090300
	660	3849970		660	11313600
	661	3786480		661	11457100
	662	3678370		662	11507700
	663	3534610		663	11463700
	664	3351740		664	11330100
	665	3160460		665	11102100
	666	2963260		666	10811600
	667	2748090		667	10461600
	668	2523740		668	9982290
	669	2307300		669	9490250
	670	2107290		670	8987690
	671	1911080		671	8383340
	672	1724850		672	7815610
	673	1565670		673	7267740
	674	1397410		674	6671500
	675	1254800		675	6104000
	676	1140420		676	5615050
	677	1039960		677	5150610
	678	940550		678	4743780
	679	853620		679	4317350
	680	781650		680	3997240
	681	723640		681	3676610
	682	666690		682	3387310
	683	613410		683	3136250
	684	576320		684	2947070
	685	537910		685	2769840
	686	507680		686	2600360
	687	483250		687	2472190
	688	461590		688	2349940
	689	440430		689	2243550
	690	416600		690	2146230
	691	400980		691	2082810
	692	384160		692	2010640
	693	374240		693	1932600
	694	363160		694	1878910
	695	349500		695	1820040
	696	335370		696	1756060
	697	328710		697	1692340
	698	317680		698	1660720
	699	310280		699	1607530
	700	295770		700	1548740
	701	289770		701	1521510
	702	278300		702	1472410
	703	275510		703	1441850
	704	268760		704	1398640
	705	262410		705	1366180
	706	255020		706	1337520
	707	248920		707	1300970
	708	240860		708	1276080
	709	238880		709	1245500
	710	228780		710	1227280
	711	226010		711	1206950
	712	220140		712	1176720
	713	216140		713	1156420
	714	212900		714	1133590
	715	208120		715	1117190
	716	200810		716	1088790
	717	198890		717	1069540
	718	194020		718	1052170
	719	186610		719	1028860
	720	180700		720	1005560
	721	180400		721	980280
	722	172270		722	965960
	723	167440		723	934260
	724	162210		724	921300
	725	158040		725	890580
	726	153370		726	868320
	727	148290		727	836590
	728	144440		728	821410
	729	138620		729	794170
	730	135580		730	769010
	731	129170		731	737010
	732	127170		732	712360
	733	117010		733	687450
	734	114830		734	659150
	735	108820		735	626520
	736	103650		736	601660
	737	96930		737	570960
	738	93480		738	542380
	739	88270		739	507460
	740	82810		740	480200
	741	77320		741	451930
	742	70610		742	424780
	743	69790		743	397940
	744	63650		744	370450
	745	60690		745	344770
	746	54830		746	321960
	747	52170		747	295810
	748	48850		748	276180
	749	45800		749	259740
	750	42380		750	242390

## Sheet: Figure 2f
Figure 2f
	Time(s)	Temperature(℃）		Time(s)	Temperature(℃）		Time(s)	Temperature(℃）
PBS	0	28.291	GP-AuNPs@Ce6(-)	0	28.7741	GP-AuNPs@Ce6(+)	0	28.71
	10	28.4008		10	28.8338		10	29.5598
	20	28.5154		20	28.804		20	30.3136
	30	28.8139		30	28.8487		30	31.131
	40	28.943		40	28.8785		40	31.954
	50	29.1464		50	28.8089		50	32.7829
	60	29.2801		60	28.8338		60	33.513
	70	29.3592		70	28.794		70	34.5552
	80	29.5273		80	28.8685		80	35.3809
	90	29.6211		90	28.8884		90	36.1039
	100	29.7248		100	28.8834		100	36.9911
	110	29.9367		110	28.9132		110	37.7673
	120	30.1334		120	28.8437		120	38.5983
	130	30.3348		130	28.8387		130	39.3263
	140	30.4574		140	28.8586		140	39.1414
	150	30.531		150	28.8636		150	40.0139
	160	30.7366		160	29.1414		160	40.9125
	170	30.9174		170	29.3048		170	41.7313
	180	31.0102		180	29.5125		180	42.5098
	190	31.1761		190	29.5965		190	43.3034
	200	31.3027		200	29.5965		200	44.1333
	210	31.4487		210	29.5965		210	44.951
	220	31.5848		220	29.5965		220	45.6752
	230	31.7354		230	30.2121		230	45.9994
	240	31.8712		240	30.3299		240	46.8986
	250	31.9632		250	30.4721		250	47.6809
	260	32.1133		260	30.6436		260	48.6044
	270	32.2197		270	30.7904		270	49.352
	280	32.2632		280	30.9077		280	50.033
	290	32.268		290	30.8833		290	50.5134
	300	32.2777		300	30.8979		300	50.7525

## Sheet: Sheet5
Figure 2g
	PBS	Relative SOSG intensity			Ce6	Relative SOSG intensity			GP-dAuNPs@Ce6(-)	Relative SOSG intensity			GP-dAuNPs@Ce6(+)	Relative SOSG intensity
	0min	1.1	1.22	1.37		0.343	0.767	1.202		2.747	3.26	2.976		2.423	3.389	2.4788
	5min	1.19	1.34	1.19		39.413	37.48	36.674		30.169	29.225	29.321		29.444	27.397	28.188
	10min	0.87	1.2	1		39.963	41.706	39.856		39.517	39.58	42.893		36.095	37.985	35.039
	15min	1.07	1.22	1.13		46.622	47.076	49.472		39.35	40.813	40.906		35.741	38.544	36.547
	20min	1.18	1.26	1.12		43.996	44.297	43.885		39.647	39.269	41.063		39.477	38.82	38.829

## Sheet: Sheet6
Figure 2i
	Depth(mm)					Depth(mm)					Depth(mm)					Depth(mm)					Depth(mm)
PBS	0	1.0933	1.3243	1.2092	GP-AuNPs@Ce6(-)	0	1.065	1.3209	1.2312	GP-AuNPs@Ce6(+)	0	1.1763	1.0923	0.9875	GP-dAuNPs@Ce6(-)	0	0.7275	1.2345	0.9823	GP-dAuNPs@Ce6(+)	0	4.6041	4.7526	4.8972
	1	1.0918	0.9871	0.8762		1	0.8721	1.2098	1.0921		1	1.3046	1.2314	1.1098		1	1.1468	1.0934	1.276		1	4.0773	4.0092	4.1135
	2	1.015	0.9978	1.0023		2	0.7139	0.9324	1.0235		2	1.3219	1.2098	1.2134		2	0.8366	0.9076	1.1076		2	3.1669	3.2564	3.0983
	3	0.772	0.998	1.2354		3	0.9343	1.2781	1.3923		3	1.0593	0.879	0.7324		3	0.7331	0.8907	0.9345		3	2.6931	2.5677	2.8979
	4	0.9855	1.2543	1.0045		4	1.3601	0.9012	0.8321		4	1.0341	1.298	0.9876		4	1.0608	1.0356	1.3478		4	2.0819	2.1342	2.3391
	5	0.8177	0.6734	1.1109		5	1.1586	1.3247	0.879		5	1.1526	1.2209	0.879		5	1.1789	1.0923	1.2098		5	1.0265	0.8973	0.7613
