# Supplementary material for: Pac-Man bacteria eat nanoprobes for aggregation-enhanced imaging and killing diverse microorganisms
Source: Research Square preprint supplement (doi:10.21203/rs.3.rs-272302/v1), 2021-04-09
Supplement: Supplementary file 13 [file fb2e3a06ad5f95171053cef5.xlsx]

## Sheet: Figure 5a
Figure 5a
Flu	(-)	p/s/cm2/sr(108)			(+)	p/s/cm2/sr(108)					PA	(-)	PA Signals Intensity(a.u.)			(+)	PA Signals Intensity(a.u.)
	SA	5.1	5.37	5.3	SA	7.8	8.39	7.98				SA	1.26	1.37	1.09	SA	3.26	3.49	3.09
	Tumor	2.2	2.39	1.98	Tumor	1.8	1.69	1.96				Tumor	1.06	1.27	0.76	Tumor	1.22	1.37	1.19

## Sheet: Figure 5b
Figure 5b
Flu	(-)	p/s/cm2/sr(109)			(+)	p/s/cm2/sr(109)					PA	(-)	PA Signals Intensity(a.u.)			(+)	PA Signals Intensity(a.u.)
	PA	0.5	0.52	0.47	PA	1.5	1.45	1.32				PA	1.14	1.27	1.38	PA	3.67	3.36	3.58
	Tumor	0.1	0.087	0.13	Tumor	0.07	0.096	0.057				Tumor	0.62	0.97	1.04	Tumor	0.8	0.99	1.32

## Sheet: Figure 5c
Figure 5c
Flu	(-)	p/s/cm2/sr(109)			(+)	p/s/cm2/sr(109)					PA	(-)	PA Signals Intensity(a.u.)			(+)	PA Signals Intensity(a.u.)
	SA	0.55	0.47	0.39	SA	1.4	1.52	1.59				SA	1.34	1.27	1.4	SA	4.14	4.39	3.86
	Tumor+SA	0.38	0.29	0.3	Tumor+SA	1.32	1.39	1.42				Tumor+SA	1.54	1.32	1.48	Tumor+SA	4.33	4.09	3.56

## Sheet: Figure 5d
Figure 5d
Flu	(-)	p/s/cm2/sr(109)			(+)	p/s/cm2/sr(109)					PA	(-)	PA Signals Intensity(a.u.)			(+)	PA Signals Intensity(a.u.)
	PA	0.71	0.72	0.63	PA	1.57	1.68	1.72				PA	0.98	1.32	1.07	PA	3.74	3.96	3.54
	Tumor+PA	0.63	0.57	0.49	Tumor+PA	1.56	1.63	1.78				Tumor+PA	0.73	0.94	0.85	Tumor+PA	3.69	3.76	3.88

## Sheet: Figure 5e
Figure 5e
	Flu	(-)	p/s/cm2/sr(108)			(+)	p/s/cm2/sr(108)					PA	(-)	PA Signals Intensity(a.u.)			(+)	PA Signals Intensity(a.u.)
		Gut	0.232	0.217	0.253	Gut	0.247	0.133	0.222				Gut	0.97	0.89	1.12	Gut	1.32	0.96	1.23
		Gut+EC	0.449	0.439	0.406	Gut+EC	0.639	0.638	0.658				Gut+EC	0.86	0.73	0.66	Gut+EC	3.99	4.13	4.36
